# Supplementary material for: Catalyst-free direct regiospecific multicomponent synthesis of C3-functionalized pyrroles
Source: Royal Society of Chemistry journal article supplement (doi:10.1039/d2ob00961g), 2022-01-01
Supplement: d2ob00961g1.pdf [file d2ob00961g1.pdf]

## **Supporting Information**

### **Catalyst-Free Direct Regiospecific Multicomponent Synthesis of C3- Functionalized Pyrroles**

Amol Prakash Pawar,<sup>a</sup> Jyothi Yadav,<sup>a</sup> Atul Jamkaran Dolas,<sup>a</sup> Eldhose Iype,<sup>b</sup> Krishnan Rangan,<sup>c</sup>  
Indresh Kumar\*<sup>a</sup>

<sup>a</sup>*Department of Chemistry, Birla Institute of Technology & Science, Pilani, Rajasthan, India*

*E-mail: [indresh.kumar@pilani.bits-pilani.ac.in](mailto:indresh.kumar@pilani.bits-pilani.ac.in), [indresh.chemistry@gmail.com](mailto:indresh.chemistry@gmail.com)*

<sup>b</sup>*College of Engineering and Technology, American University of the Middle East, Kuwait*

<sup>c</sup>*Department of Chemistry, BITS Pilani, Hyderabad Campus, Secunderabad, India*

#### **Table of Contents**

---

|                                                                                    |                |
|------------------------------------------------------------------------------------|----------------|
| <b>1. The general procedure, pH study, and controlled experiment</b>               | <b>S2</b>      |
| <b>2. Spectral copies of <sup>1</sup>H and <sup>13</sup>C NMR of new compounds</b> | <b>S3-S48</b>  |
| <b>3. Single Crystal X-ray and data for compound 7ah</b>                           | <b>S49-S51</b> |
| <b>4. Supporting files for the DFT-calculations</b>                                | <b>S52-S67</b> |

**General procedure for the preparation of C3-substituted pyrrole (4/7):** An over dried Schlenk tube (25 mL) was charged with succinaldehyde **1** (3.0 M sol, 0.6 mmol, 2.0 equiv.), amine **2** (0.3 mmol, 1.0 equiv.) and reactive carbonyls **3** (0.6 mmol, 2.0 equiv.) in CH<sub>2</sub>Cl<sub>2</sub>:EtOH (1:1) (3.0 mL) at 5 °C. The combined reaction mixture was stirred at the same temperature and monitored the reaction progress by TLC. Upon completion, solvents were removed under reduced pressure and the reaction was stirred between CH<sub>2</sub>Cl<sub>2</sub> (5.0 mL) and water (5.0 mL) for five minutes. The organic layer was separated, dried over anhydrous Na<sub>2</sub>SO<sub>4</sub>, and concentrated under reduced pressure. The product **4/7** (up to 81% yield) was obtained by passing through the silica-gel column by eluting with petroleum ether/EtOAc.

**pH-study during the progress of the reaction**

|                                                                                                                               |                                                                                                                                 |
|-------------------------------------------------------------------------------------------------------------------------------|---------------------------------------------------------------------------------------------------------------------------------|
| (a) Standard buffer solution at 25 °C using digital pH-meter electrode (pH = 4.05)                                            | (b) Succinaldehyde (3.0 M aqueous sol) at 25 °C using digital pH-meter electrode (pH = 2.41)                                    |
| (c) Zero hour reaction in CH <sub>2</sub> Cl <sub>2</sub> :EtOH (1.:1) at 25 °C using digital pH-meter electrode (pH = 10.45) | (d) Reaction while completed CH <sub>2</sub> Cl <sub>2</sub> :EtOH (1.:1) at 25 °C using digital pH-meter electrode (pH = 7.88) |

**Controlled experiments: The model reaction between methyl pyruvate **3a** and preformed *N*-ethyl pyrrole **5b**/ pyrrole **5q**:** An over dried schlenk tube (25 mL) was charged with methyl pyruvate **3a** (0.3 mmol, 1.0 equiv.) and *N*-ethyl pyrrole **5b** (0.6 mmol, 2.0 equiv.)/pyrrole **5q** (0.6 mmol, 2.0 equiv.) in CH<sub>2</sub>Cl<sub>2</sub>:EtOH (1:1) (3.0 mL) and stirred initially at 5 °C and later at room temperature. However, no reactions were observed between them even after 24 h.

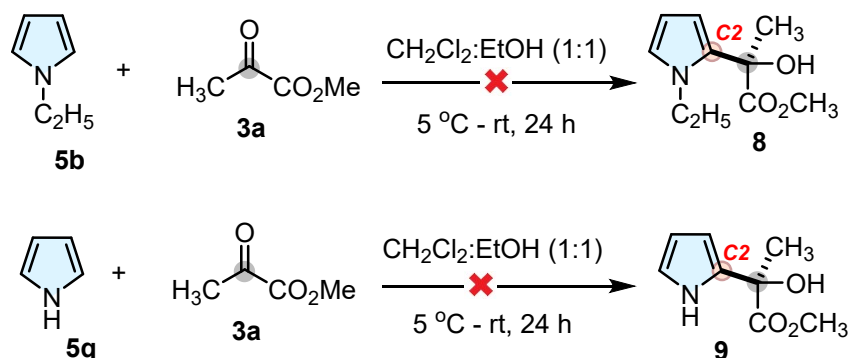

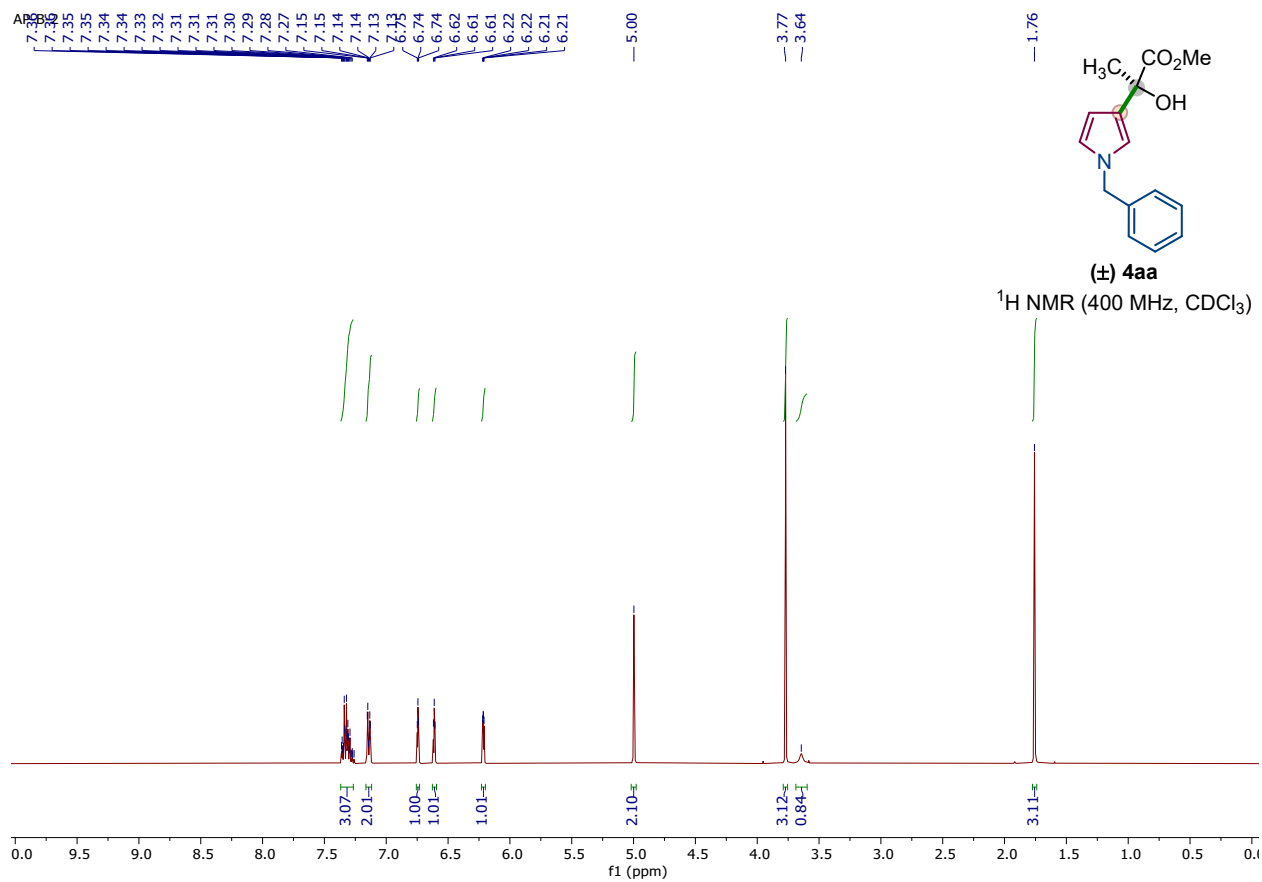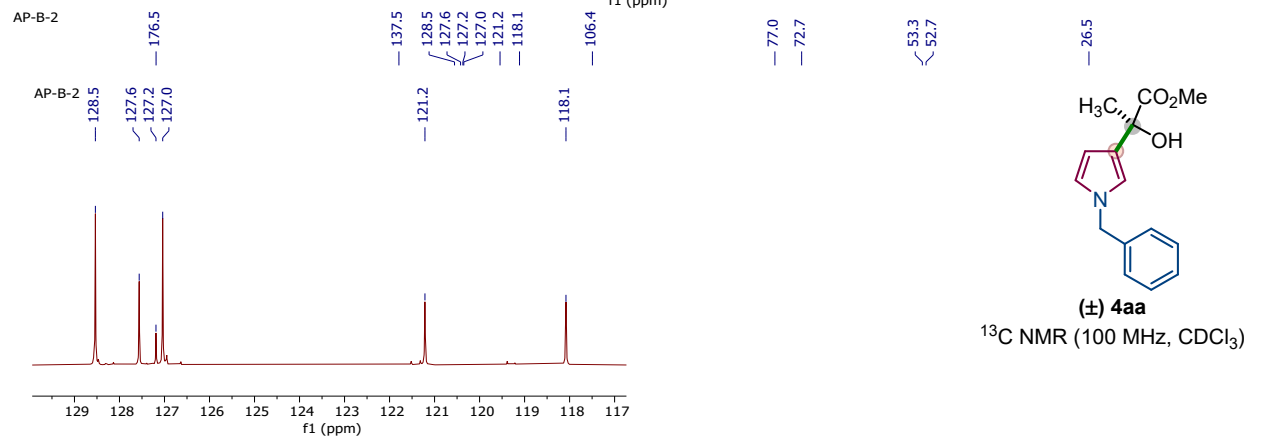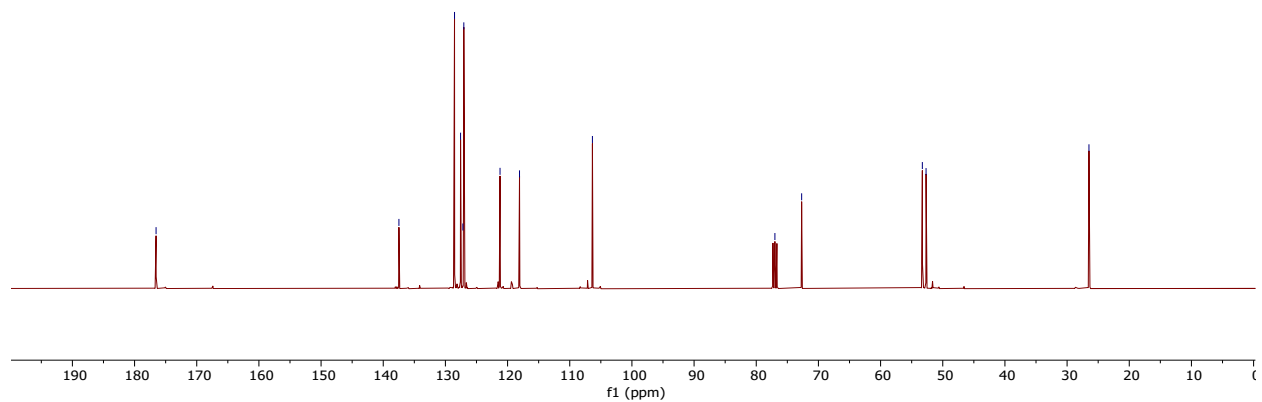

AP-ET-2

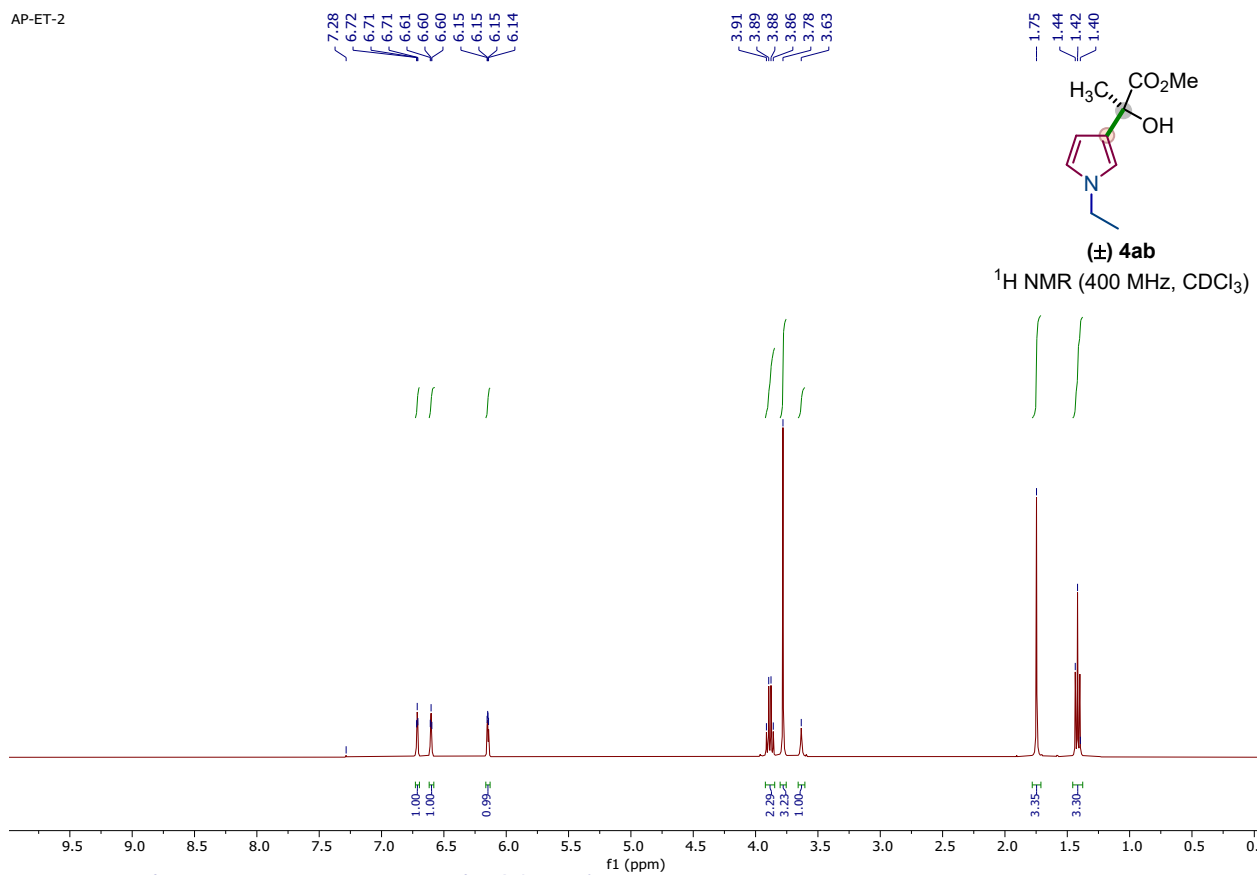

AP-ET-2

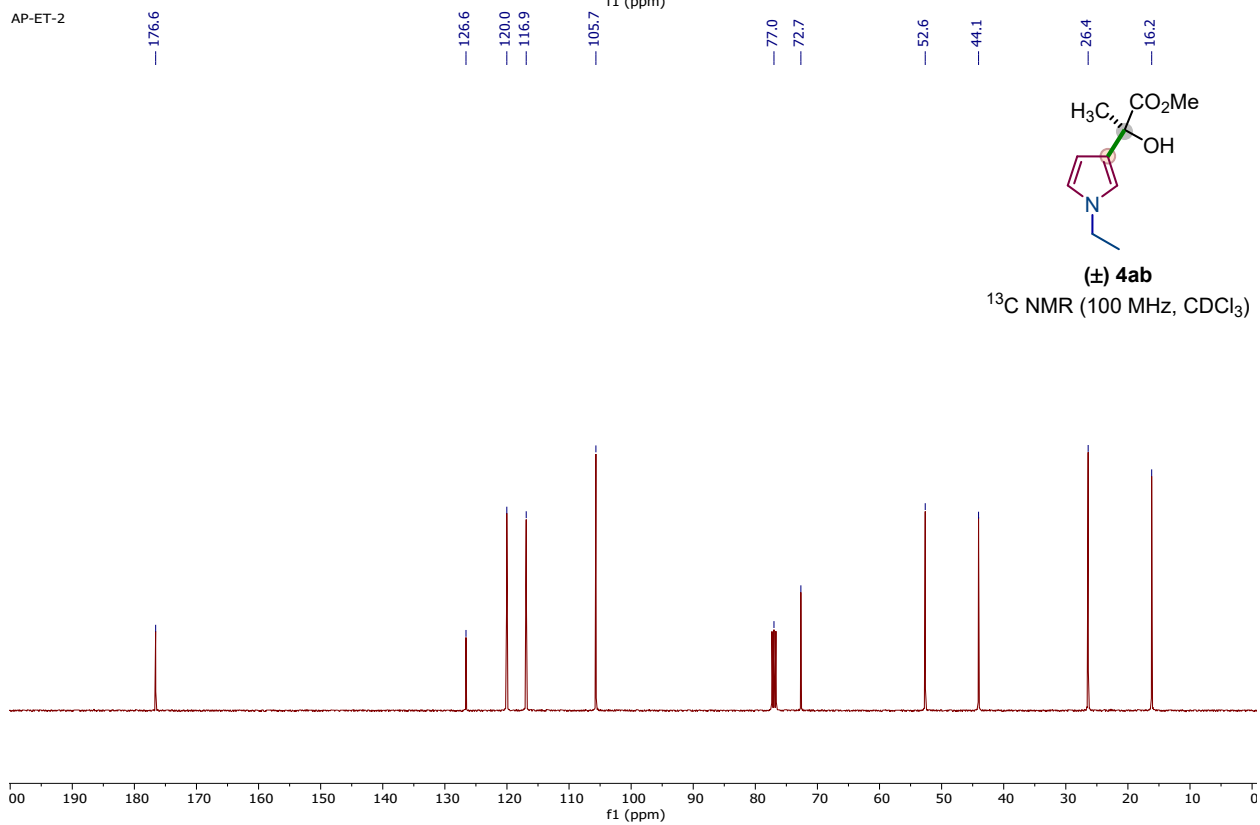

APMTRY

8.25  
7.55  
7.53  
7.36  
7.34  
7.25  
7.23  
7.21  
7.18  
7.16  
7.14  
6.76  
6.76  
6.68  
6.68  
6.67  
6.60  
6.59  
6.59  
6.19  
6.19  
6.18  
6.18  
6.18  
4.13  
4.11  
4.09  
3.79  
3.22  
3.20  
3.18

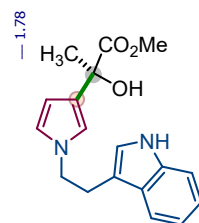

(±) 4ac

<sup>1</sup>H NMR (400 MHz, CDCl<sub>3</sub>)

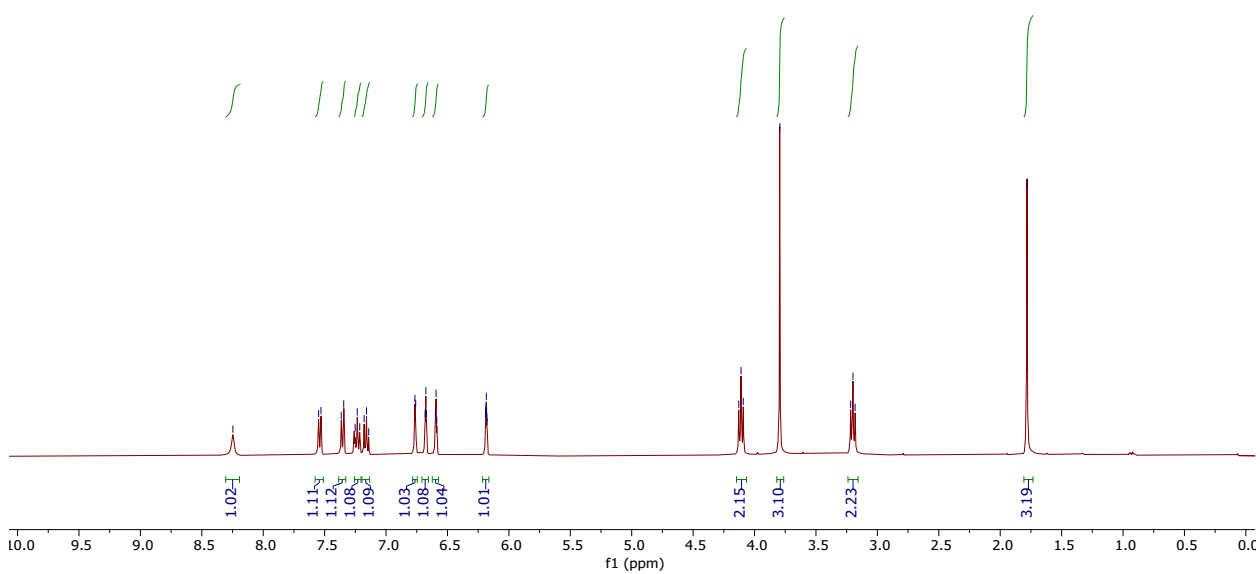

APMTRY

176.7

136.1

127.0

126.6

122.2

121.9

120.8

119.2

118.2

117.7

112.0

111.2

105.8

77.0

72.9

52.8

50.3

27.6

26.5

APMTRY

127.3

126.2

122.2

121.9

120.8

119.2

118.2

117.7

112.0

111.2

105.8

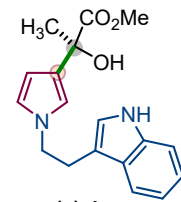

(±) 4ac

<sup>13</sup>C NMR (100 MHz, CDCl<sub>3</sub>)

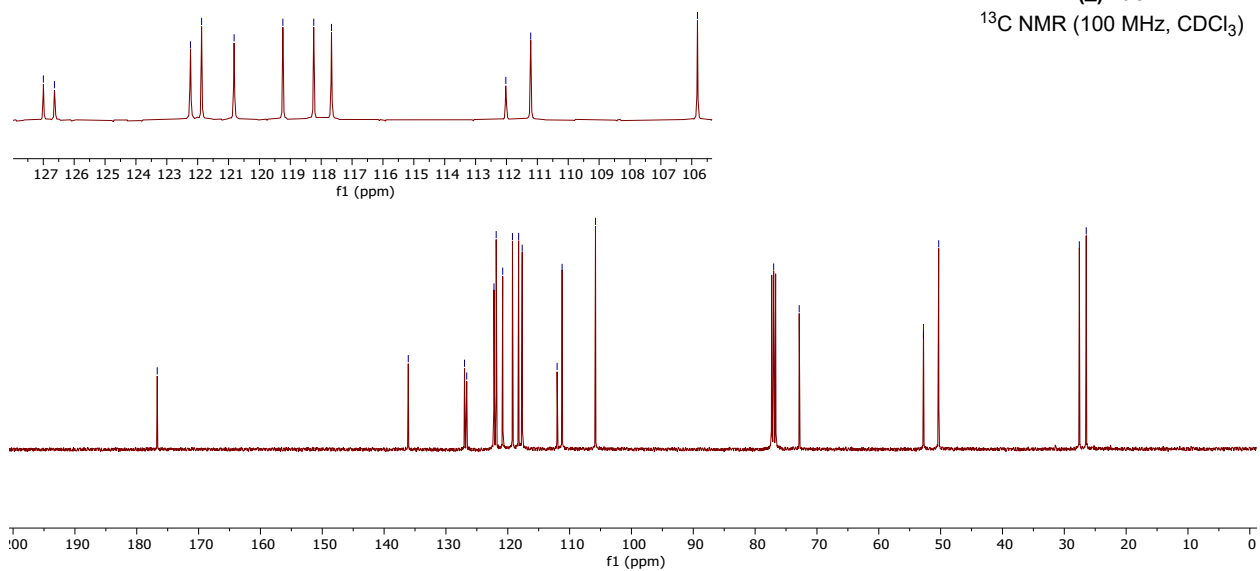

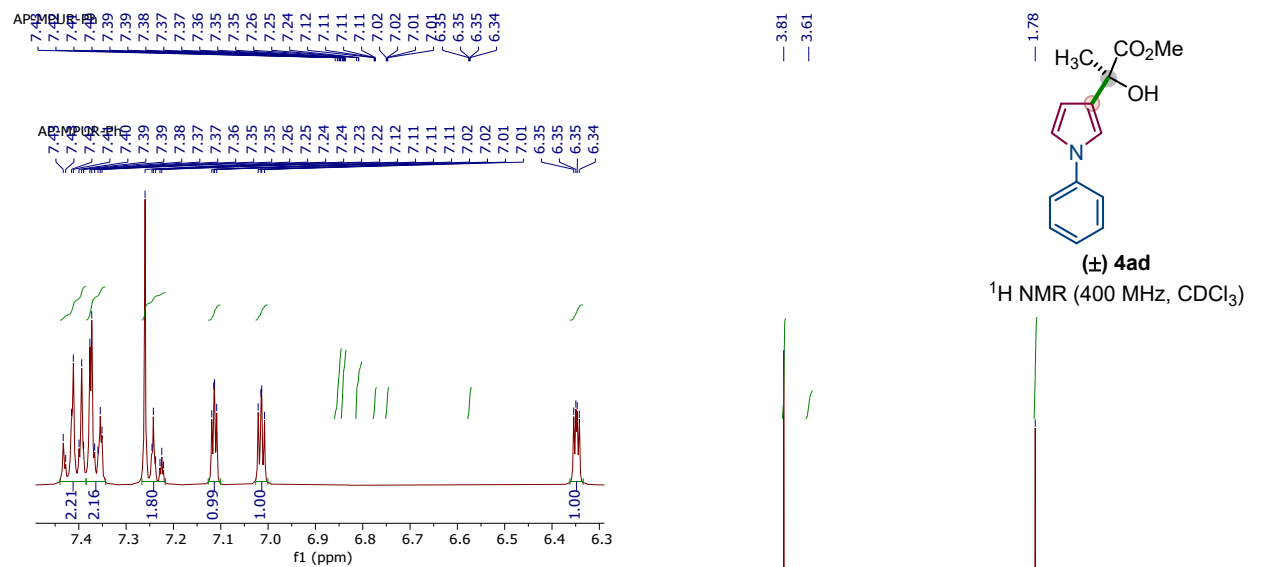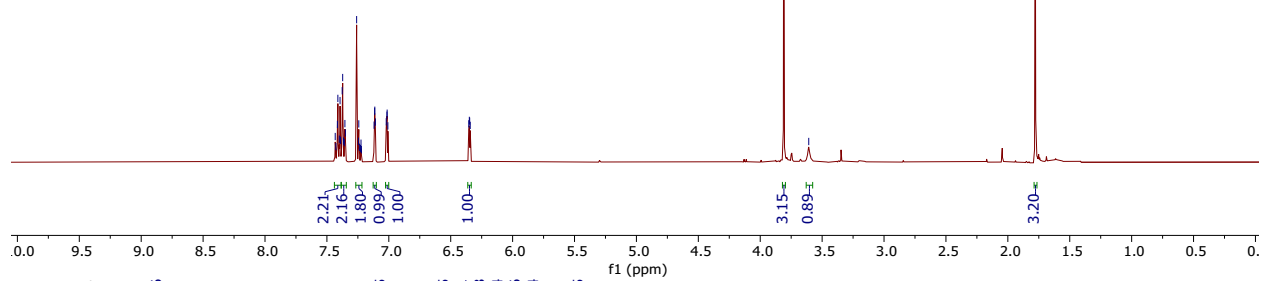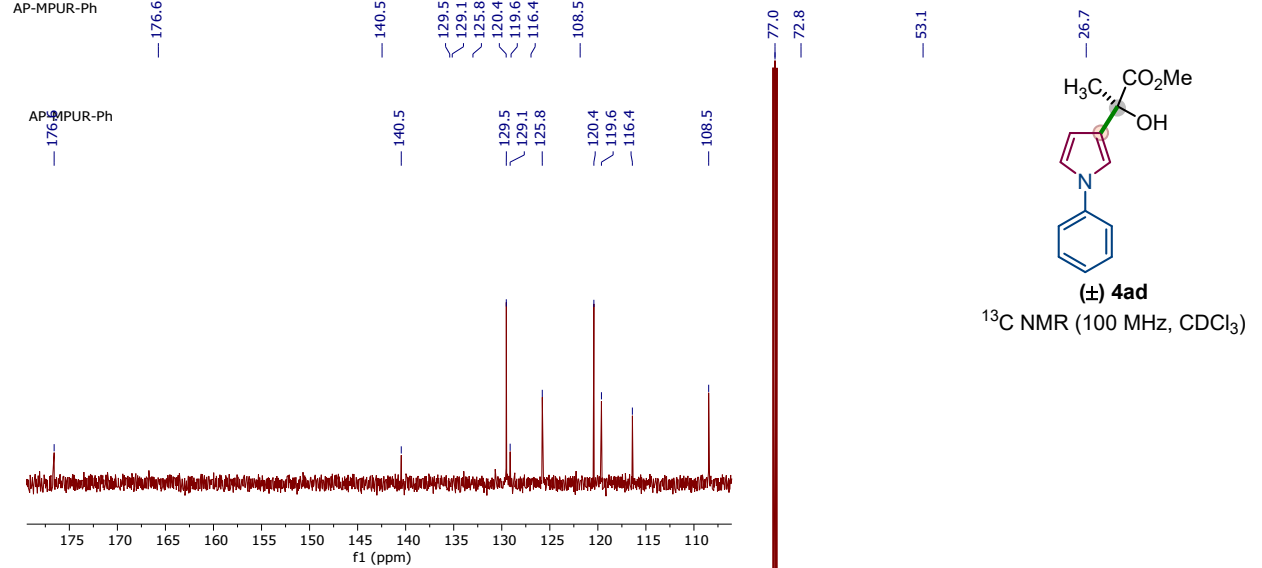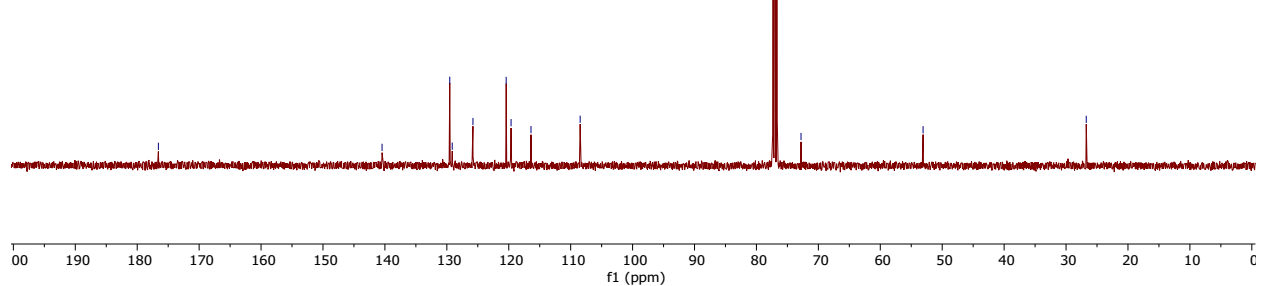

Oct15-2020/1  
AP-TOI-2

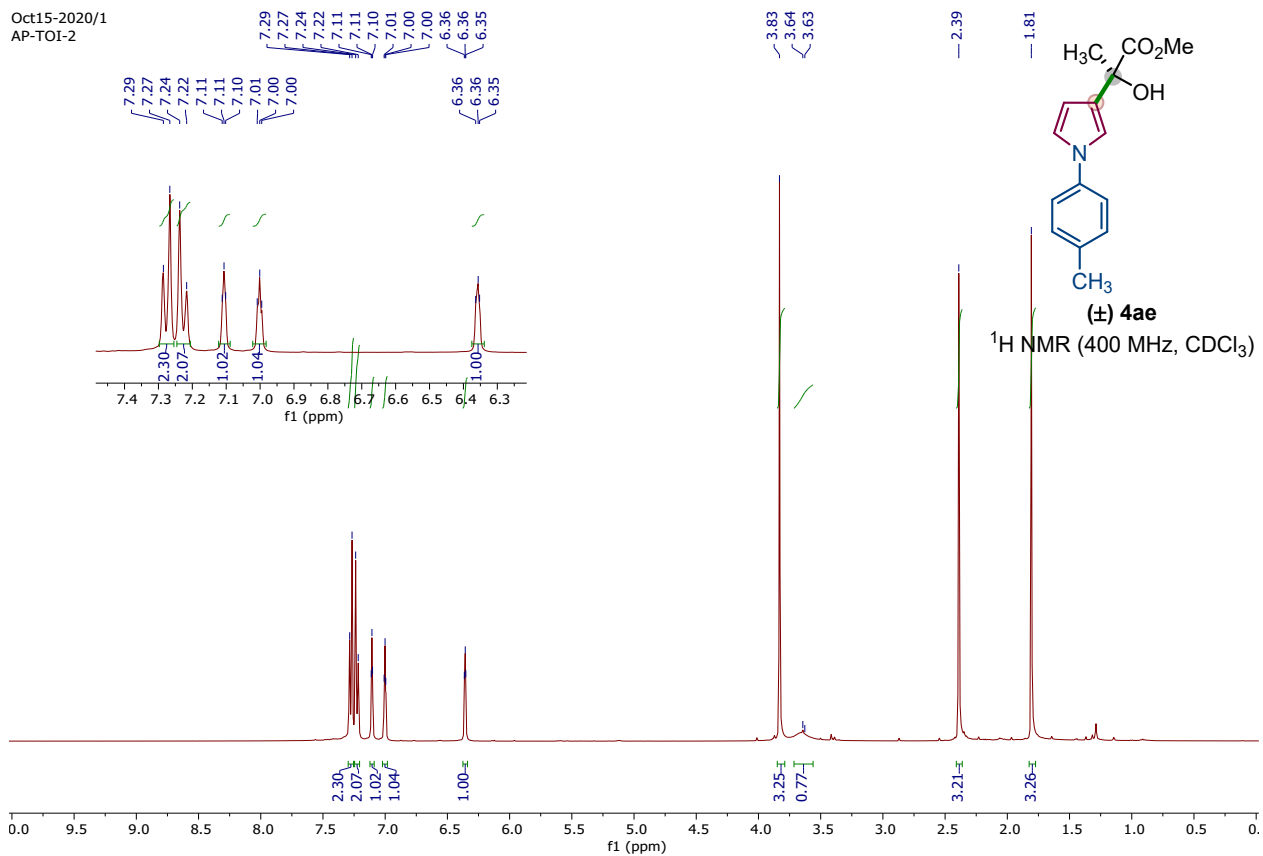

2/2  
AP-TOI-2

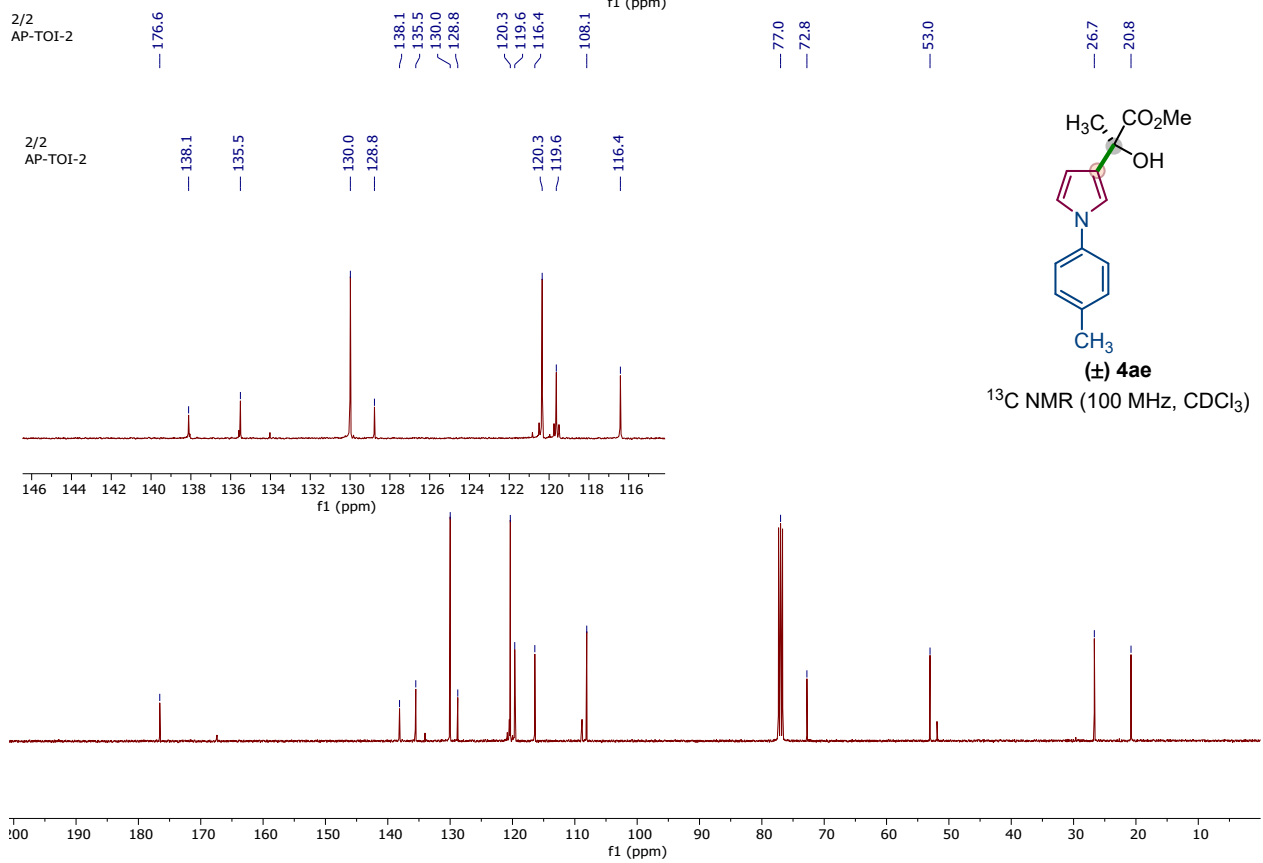

AP-D-113

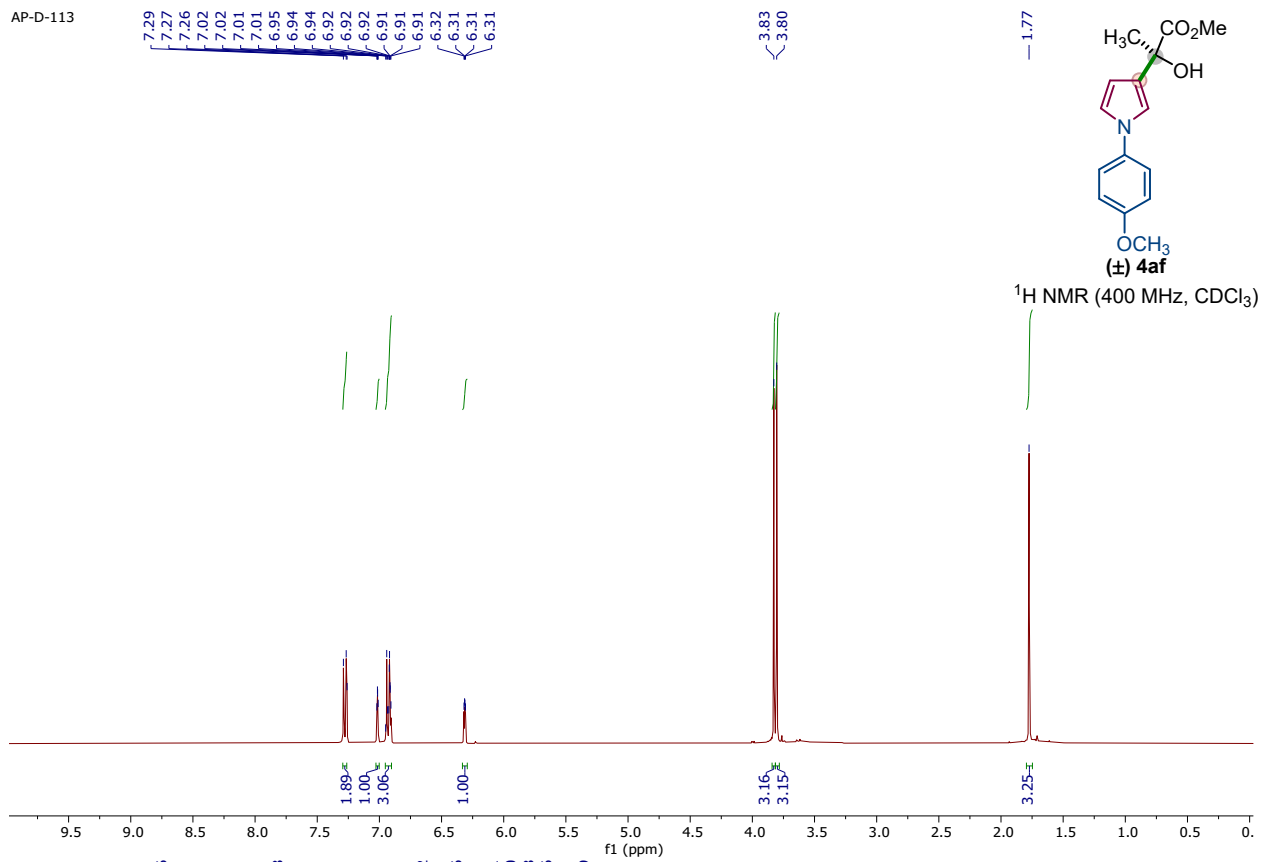

AP-D-113

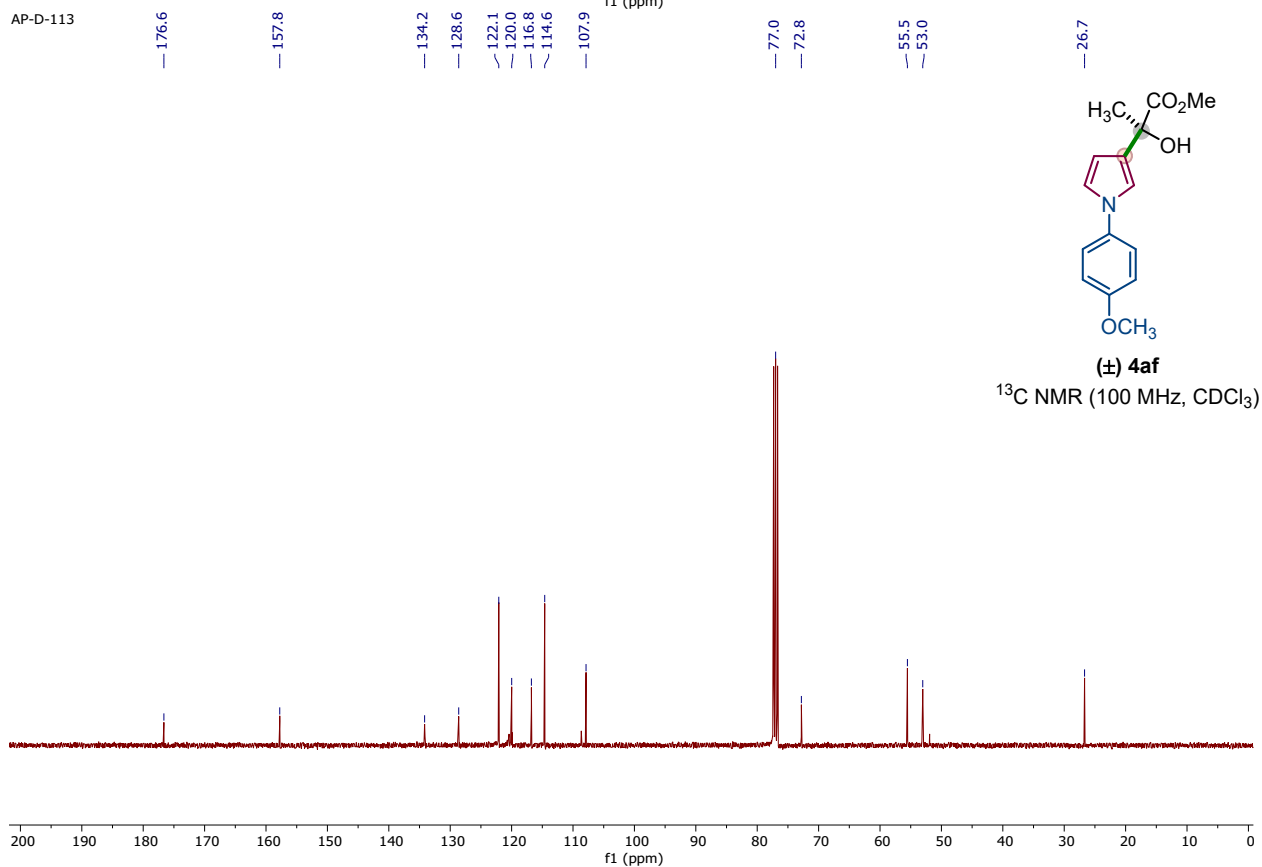



AP-EP-ET

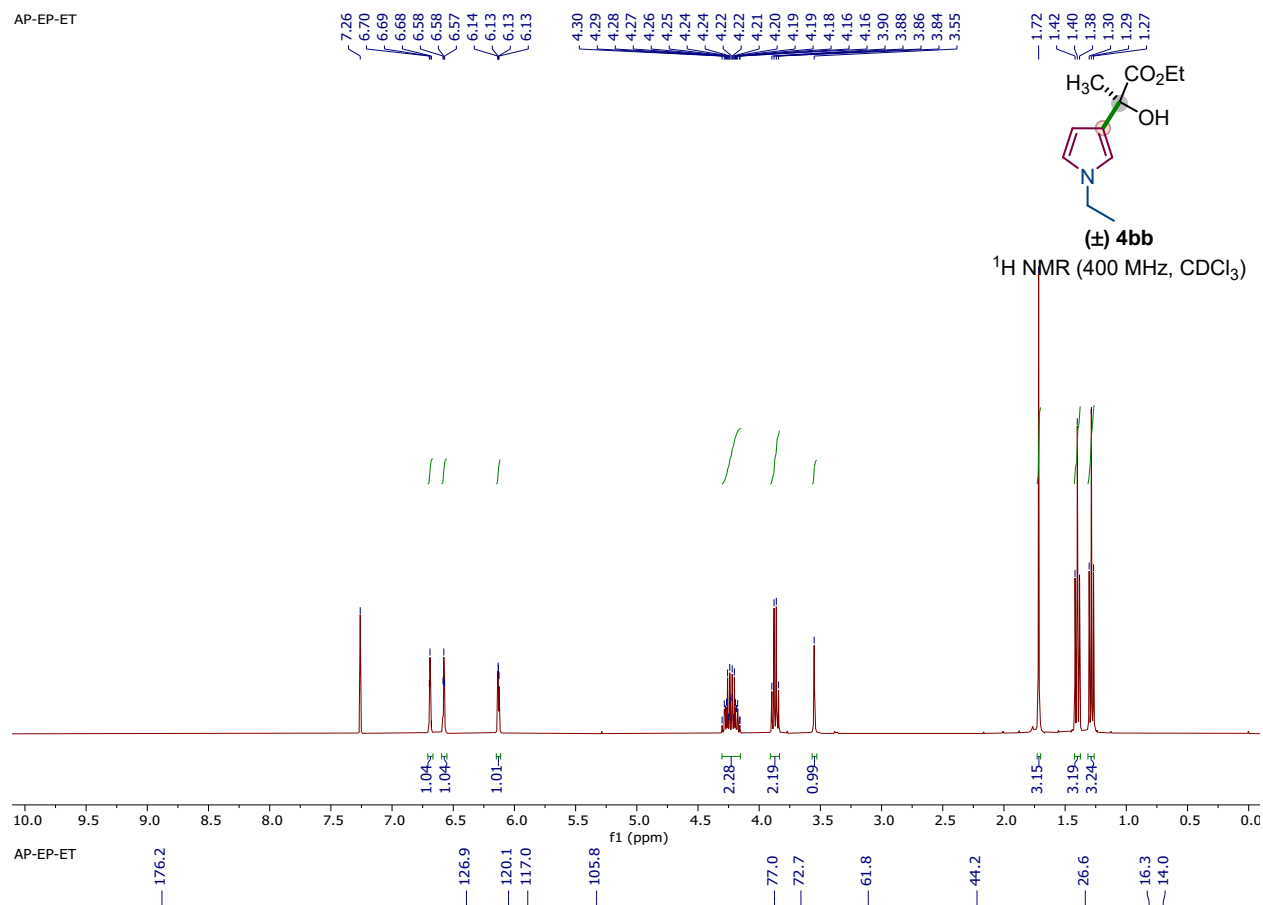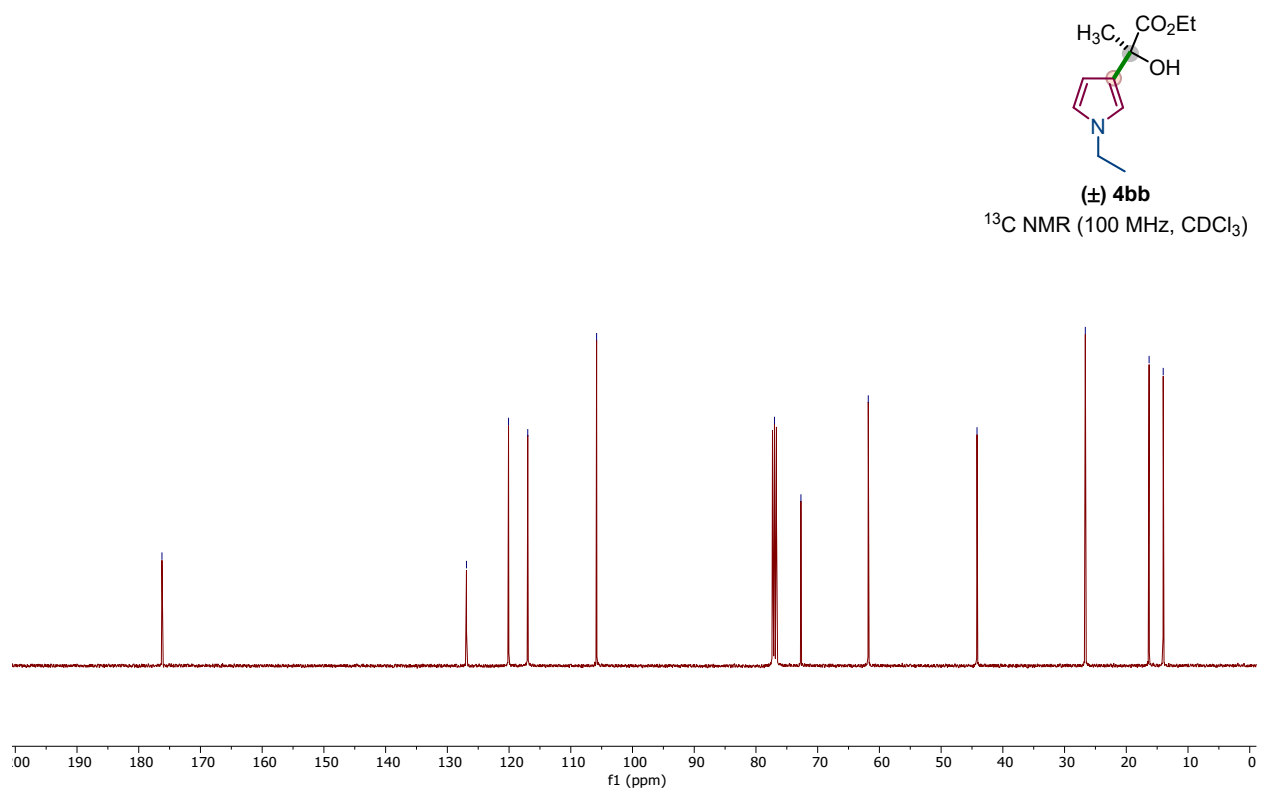

AP-PMBO

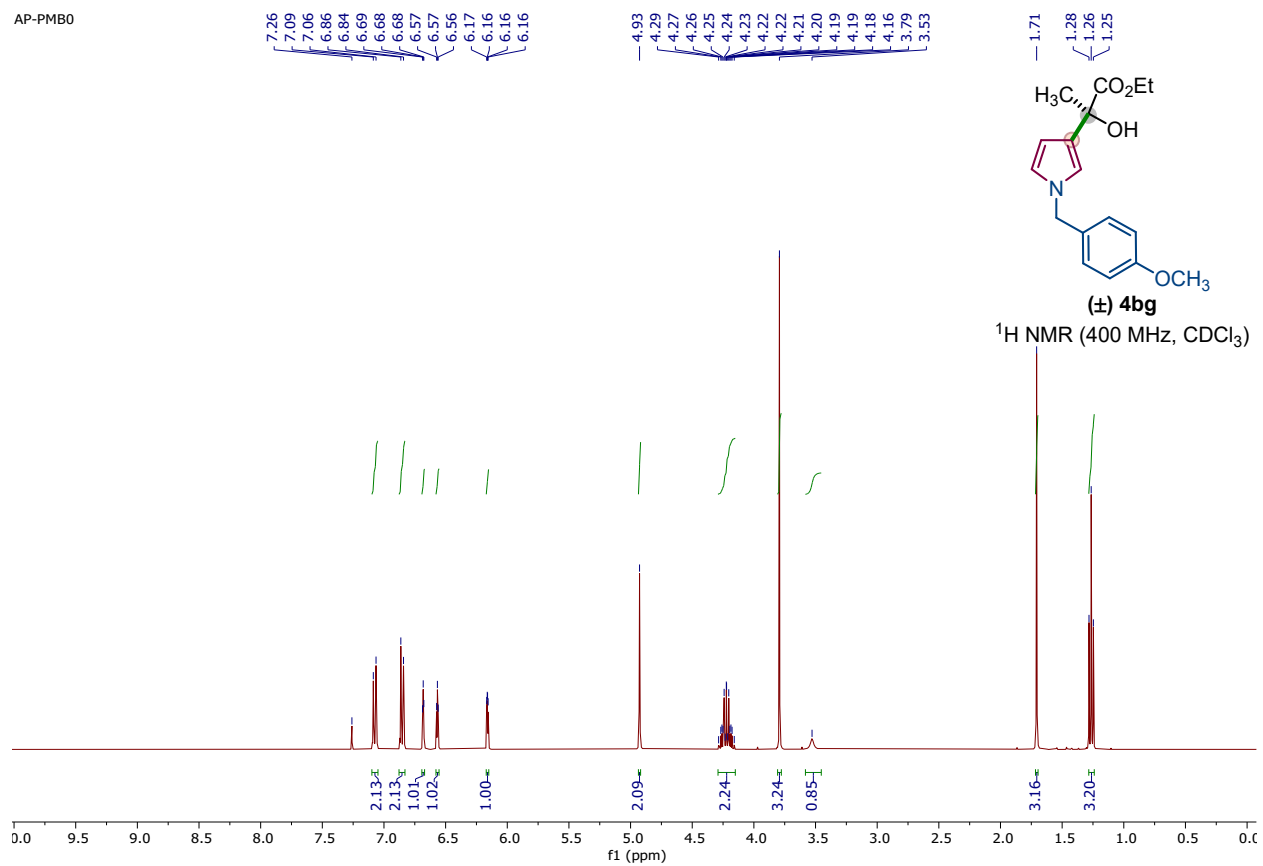

AP-PMBO

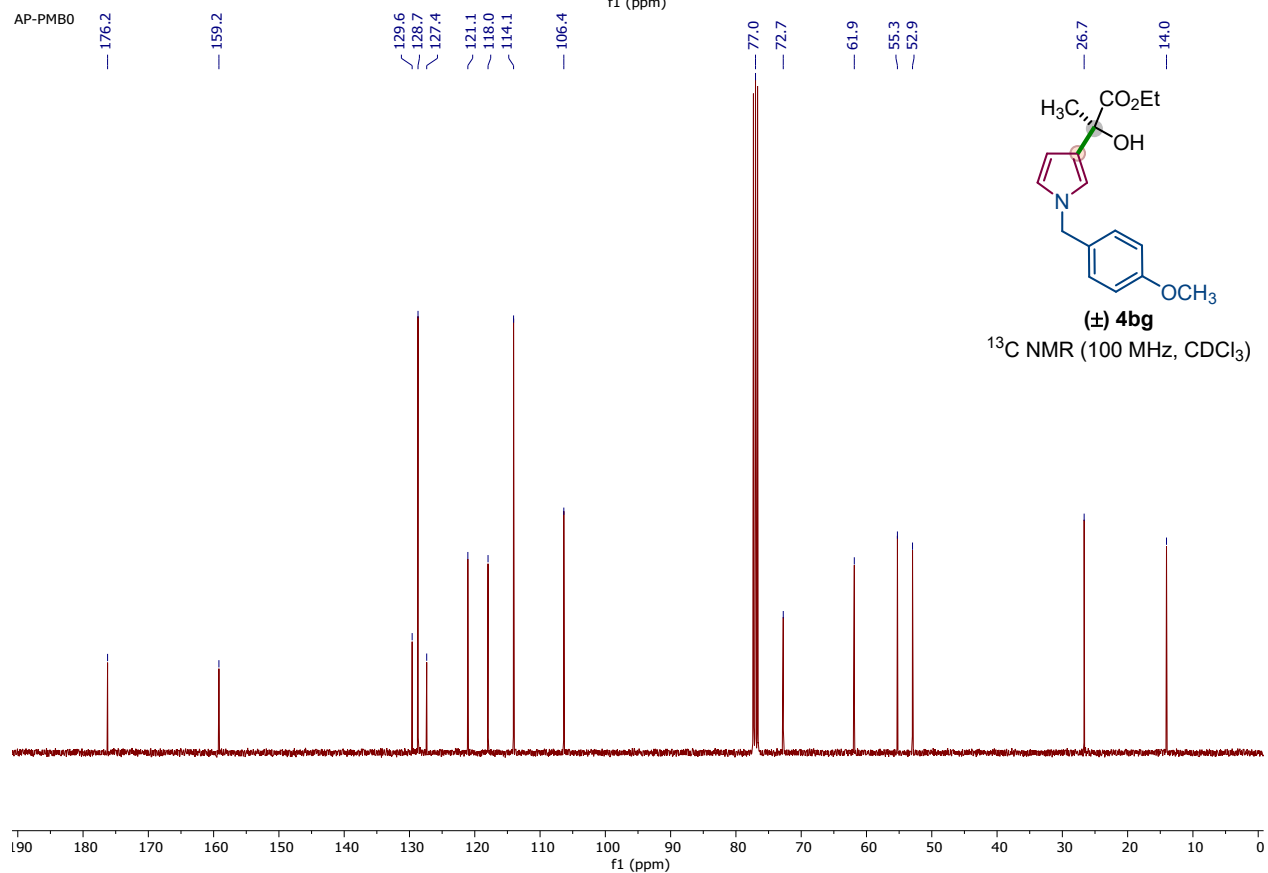

AP-CYCP-0

7.26  
6.76  
6.75  
6.75  
6.64  
6.63  
6.62  
6.09  
6.08  
6.08  
6.07  
4.28  
4.26  
4.25  
4.25  
4.24  
4.23  
4.22  
4.20  
4.19  
4.18  
4.17  
4.16  
4.16  
4.14  
3.66  
3.31  
3.30  
3.29  
3.28  
3.27  
3.27  
3.26  
3.25  
3.24  
1.69  
1.29  
1.27  
1.25  
0.92  
0.91  
0.90  
0.90  
0.89  
0.88  
0.88  
0.86  
0.86  
0.85  
0.85  
0.85  
0.84  
0.84  
0.83  
0.82  
0.82

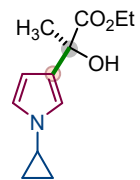

(±) 4bh

<sup>1</sup>H NMR (400 MHz, CDCl<sub>3</sub>)

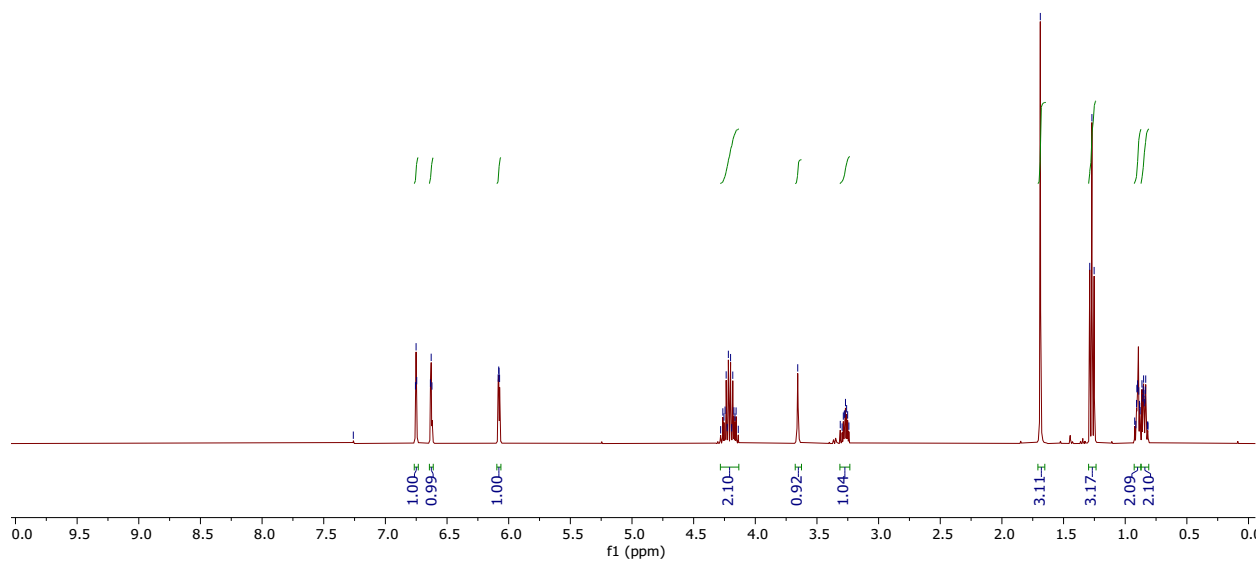

AP-CYCP

175.9  
126.7  
121.2  
118.0  
105.7  
77.0  
72.4  
61.5  
29.7  
26.4  
13.8  
5.9

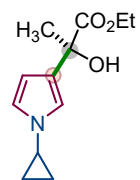

(±) 4bh

<sup>13</sup>C NMR (100 MHz, CDCl<sub>3</sub>)

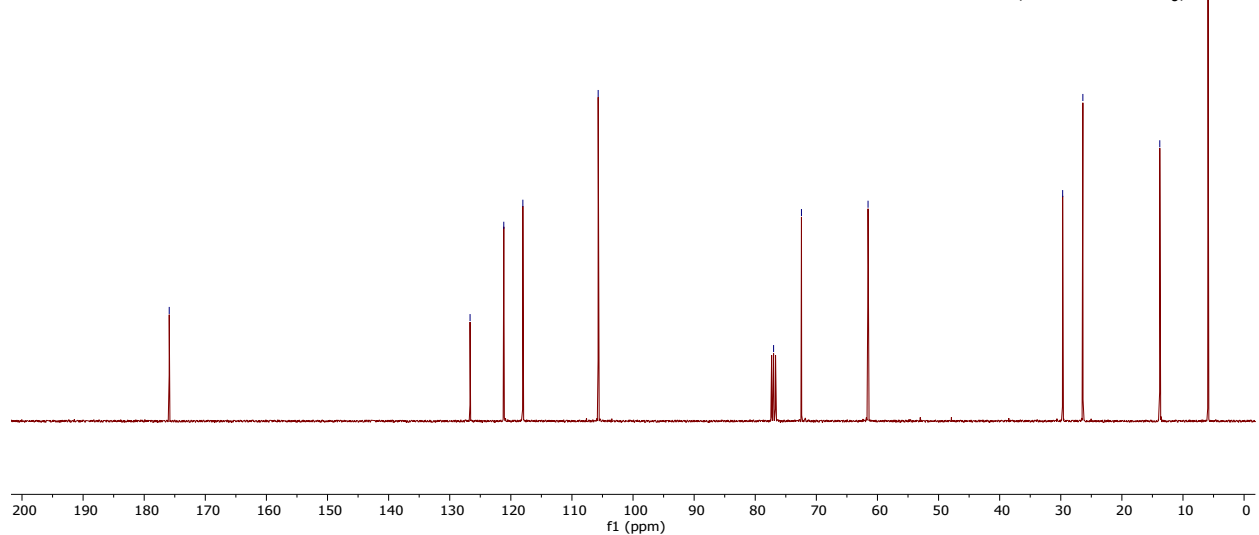

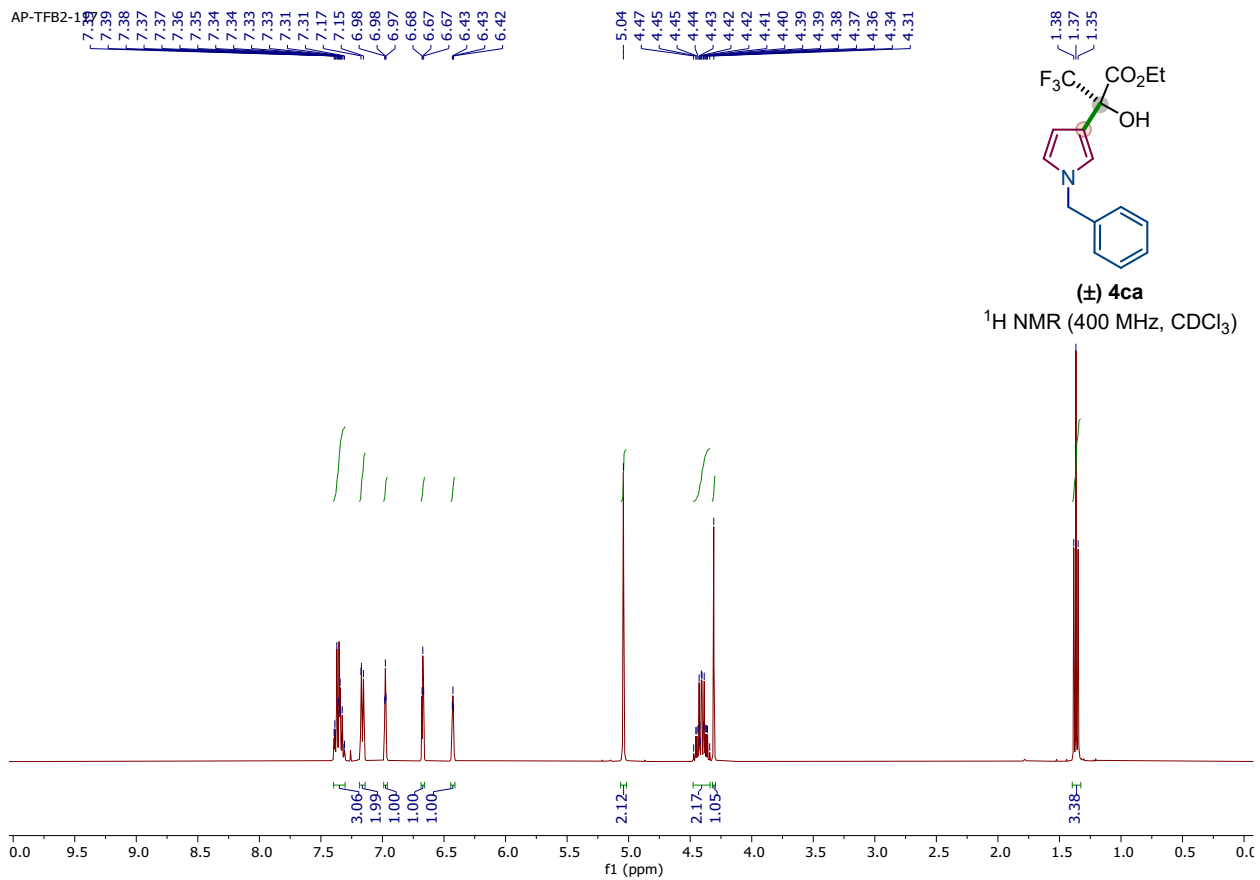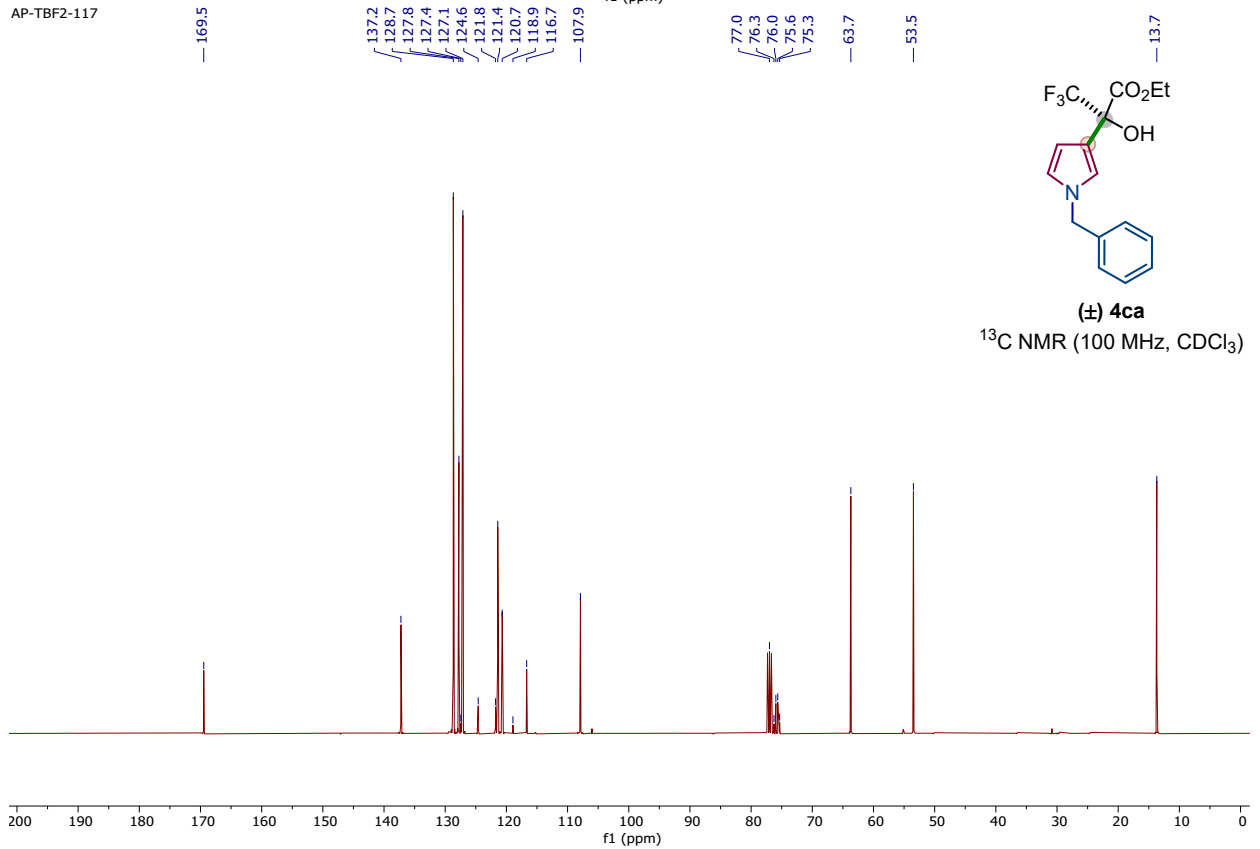

AP-TF-RT

7.26  
6.90  
6.89  
6.89  
6.63  
6.62  
6.31  
6.30  
4.44  
4.44  
4.43  
4.42  
4.41  
4.40  
4.39  
4.38  
4.37  
4.36  
4.35  
4.34  
4.33  
4.32  
4.31  
4.22  
3.93  
3.91  
3.89  
3.87

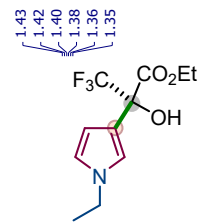

(±) 4cb  
<sup>1</sup>H NMR (400 MHz, CDCl<sub>3</sub>)

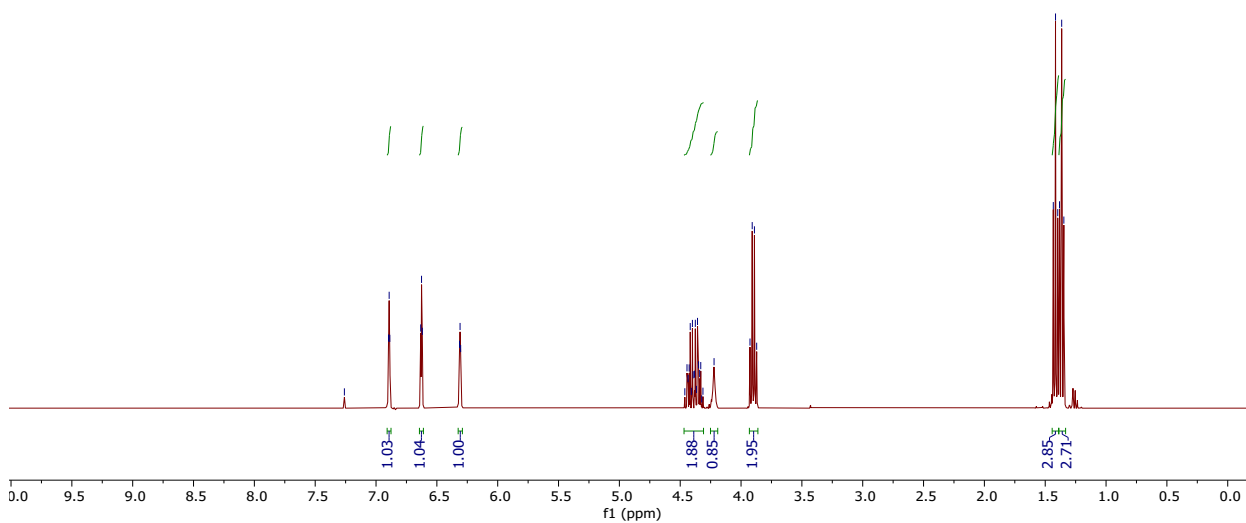

AP-TF-Et

169.6  
127.5  
124.6  
121.8  
120.4  
119.6  
119.0  
116.2  
107.4  
77.0  
76.3  
76.0  
75.7  
75.4  
63.8  
44.4  
16.3  
13.9

AP-TF-Et

127.5  
124.6  
121.8  
120.4  
119.6  
119.0  
116.2

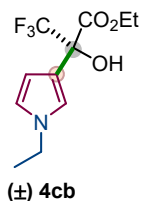

(±) 4cb  
<sup>13</sup>C NMR (100 MHz, CDCl<sub>3</sub>)

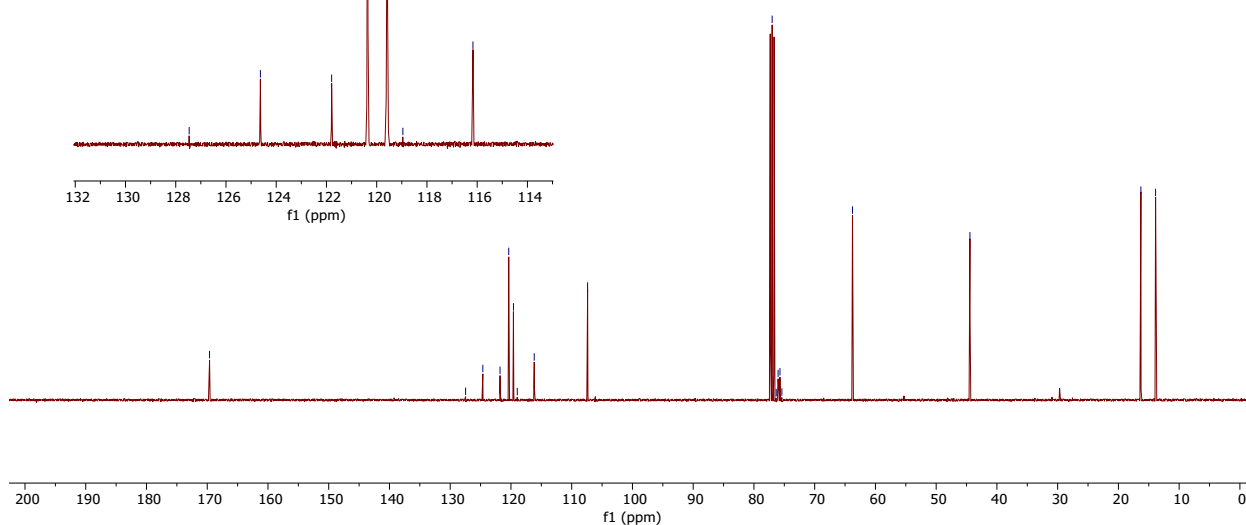

AP-TF-PMP-116

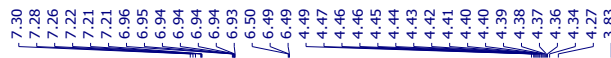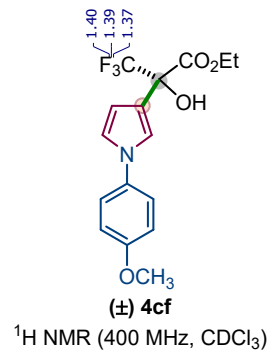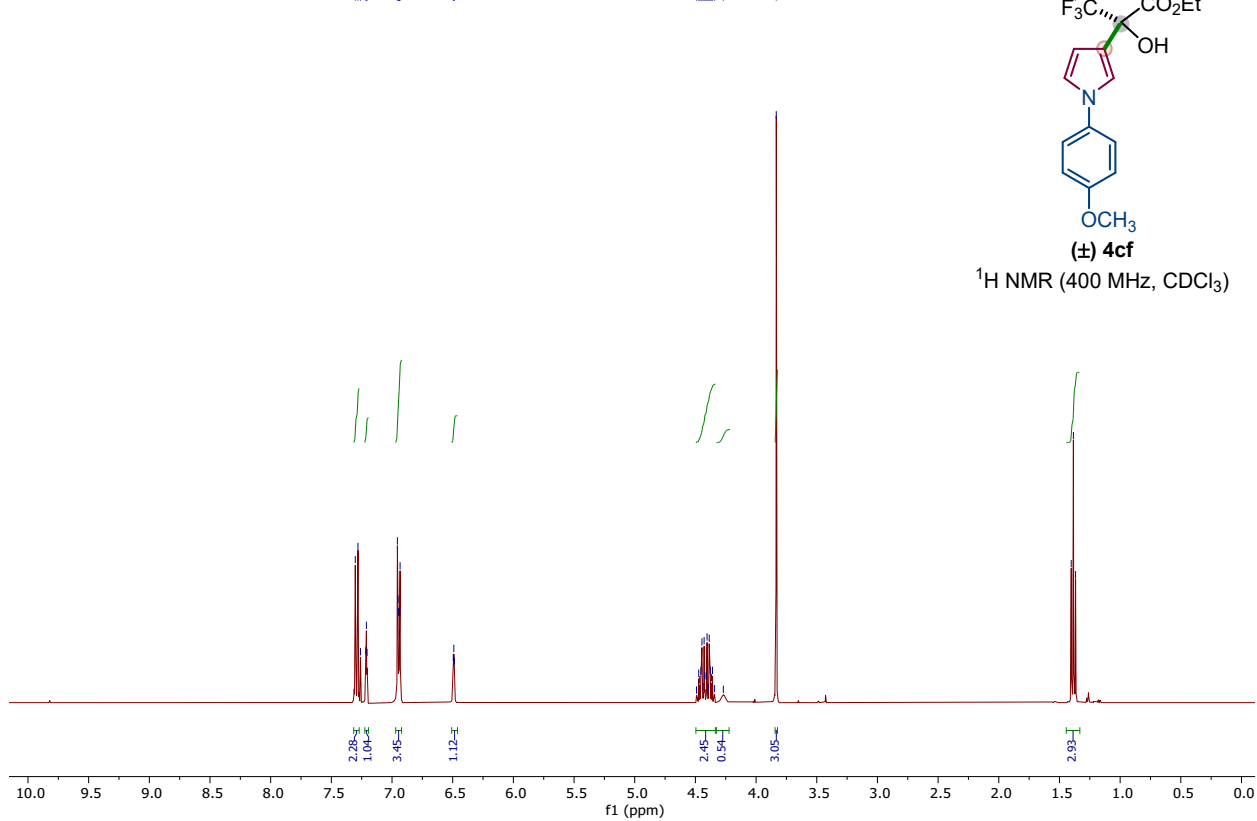

AP-TF-PMP-116

AP-TF-PMP-116

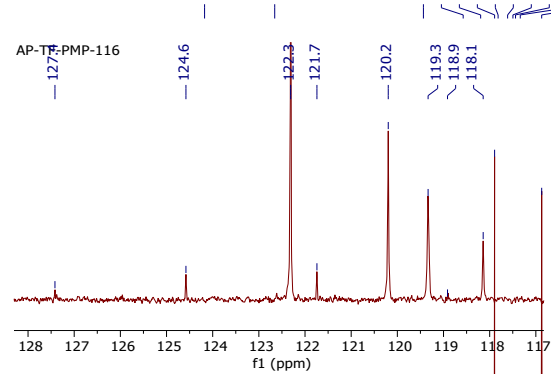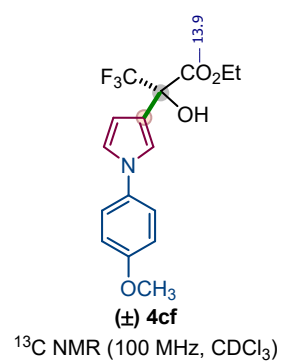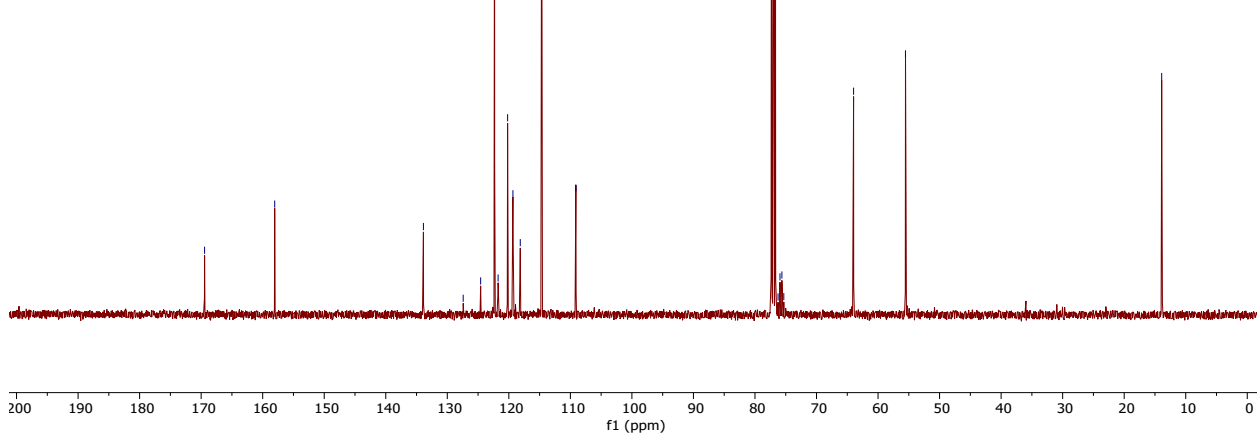

AP-TF-EtOH

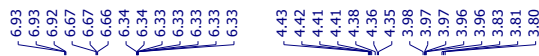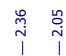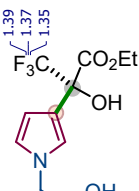

(±) 4ci

<sup>1</sup>H NMR (400 MHz, CDCl<sub>3</sub>)

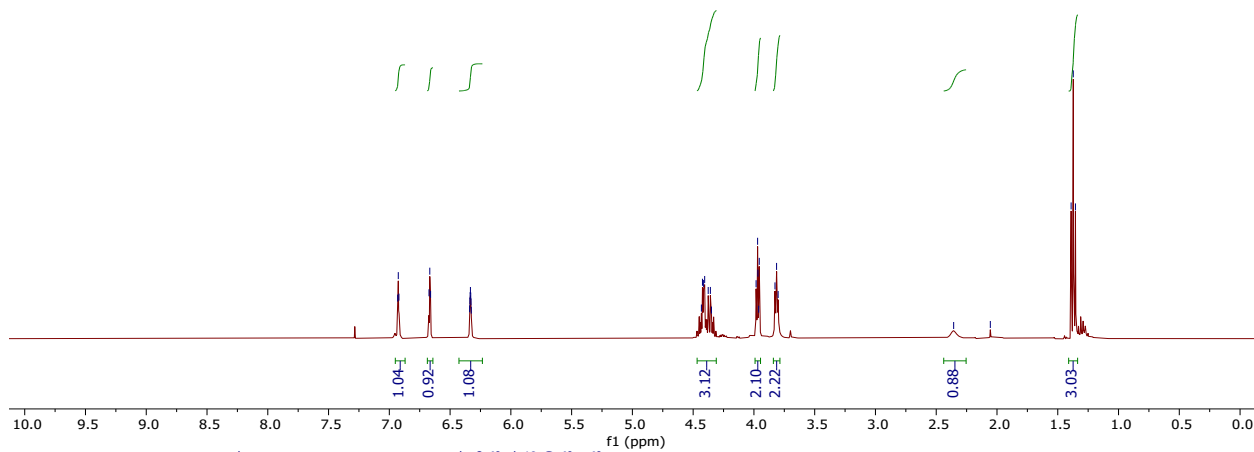

Oct16-2020/2

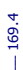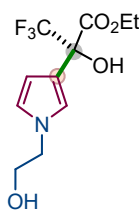

(±) 4ci

<sup>13</sup>C NMR (100 MHz, CDCl<sub>3</sub>)

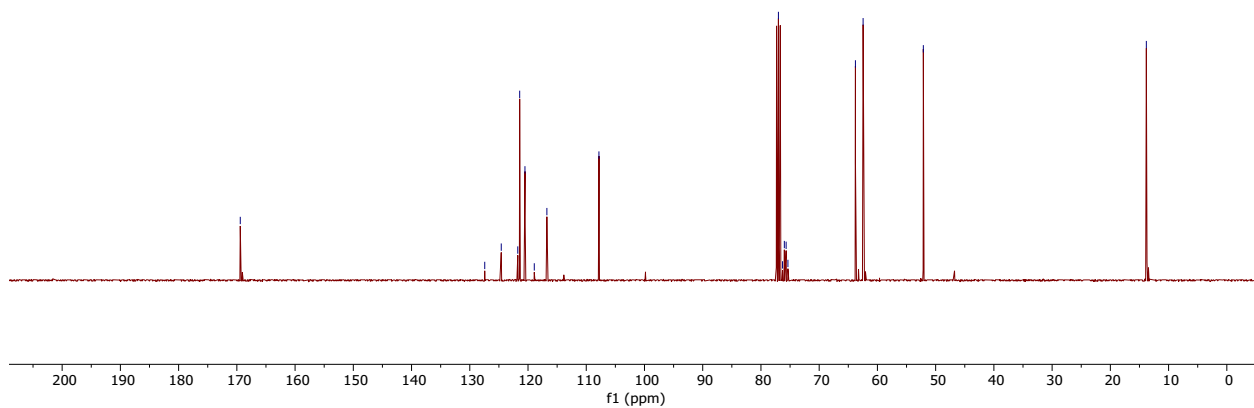

AP-MOR-TF

7.26  
6.91  
6.91  
6.90  
6.65  
6.64  
6.64  
6.30  
6.29  
6.29  
6.29  
6.28  
4.44  
4.43  
4.42  
4.41  
4.39  
4.38  
4.37  
4.36  
4.34  
4.33  
4.32  
3.97  
3.96  
3.94  
3.70  
3.69  
3.67  
2.70  
2.68  
2.66  
2.45  
2.44  
2.44  
2.43  
2.42  
1.37  
1.36  
1.34

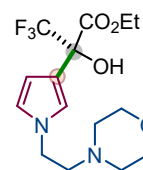

(±) 4cj

<sup>1</sup>H NMR (400 MHz, CDCl<sub>3</sub>)

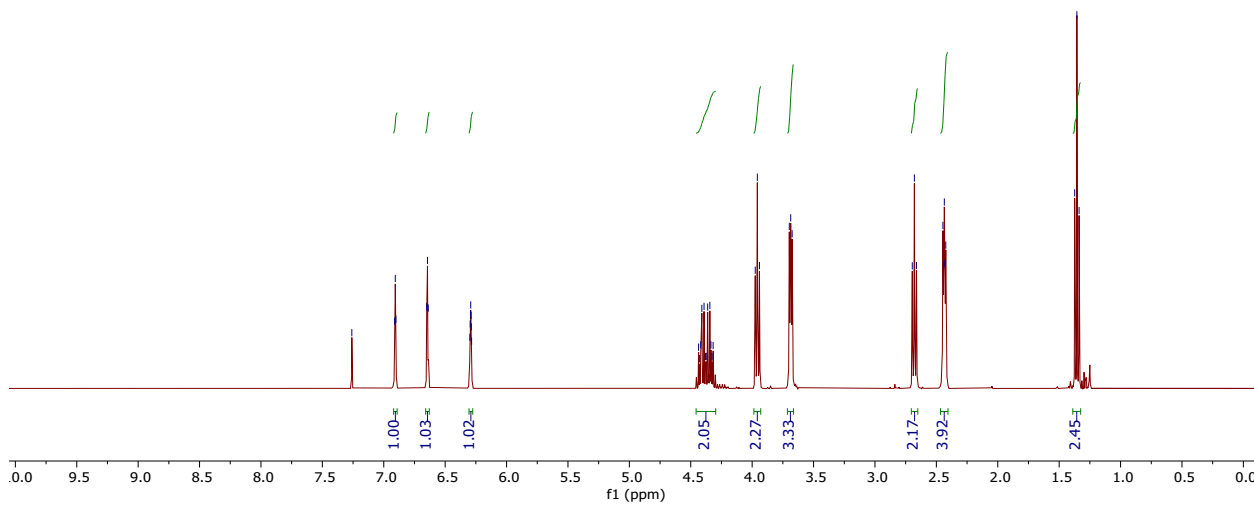

AP-MOR-TF

AP-MOR-TF

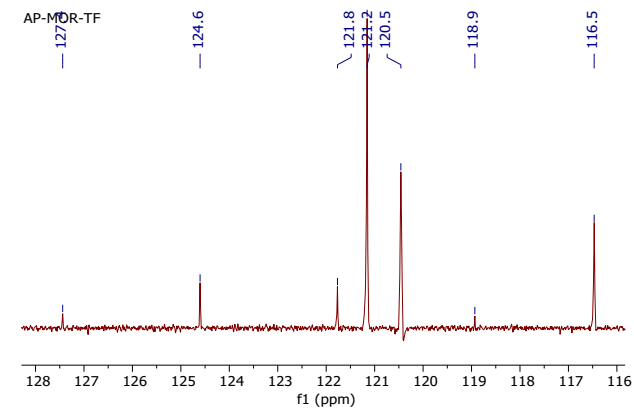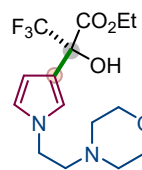

(±) 4cj

<sup>13</sup>C NMR (100 MHz, CDCl<sub>3</sub>)



Propagyl TF

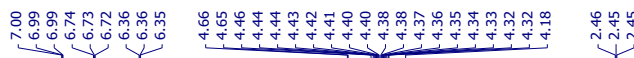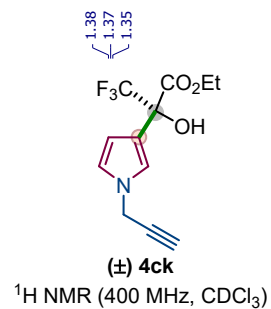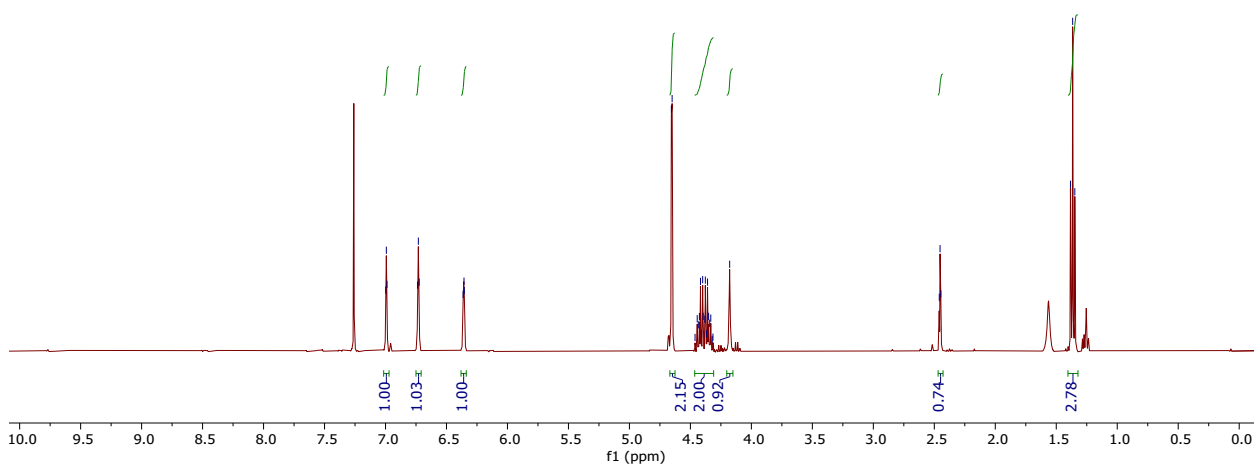

Oct23-2020/2

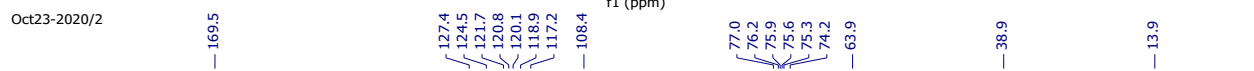

Oct23-2020/2

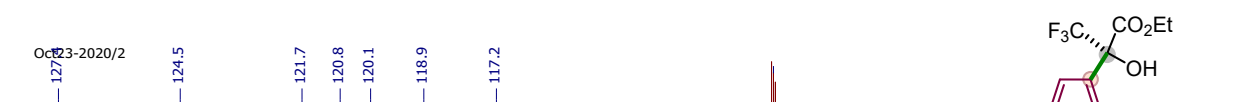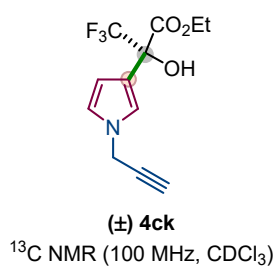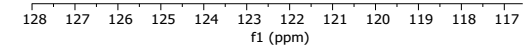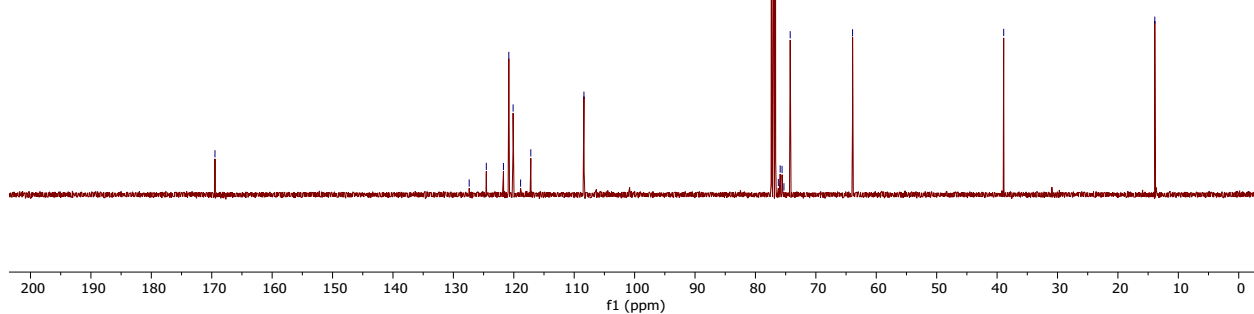

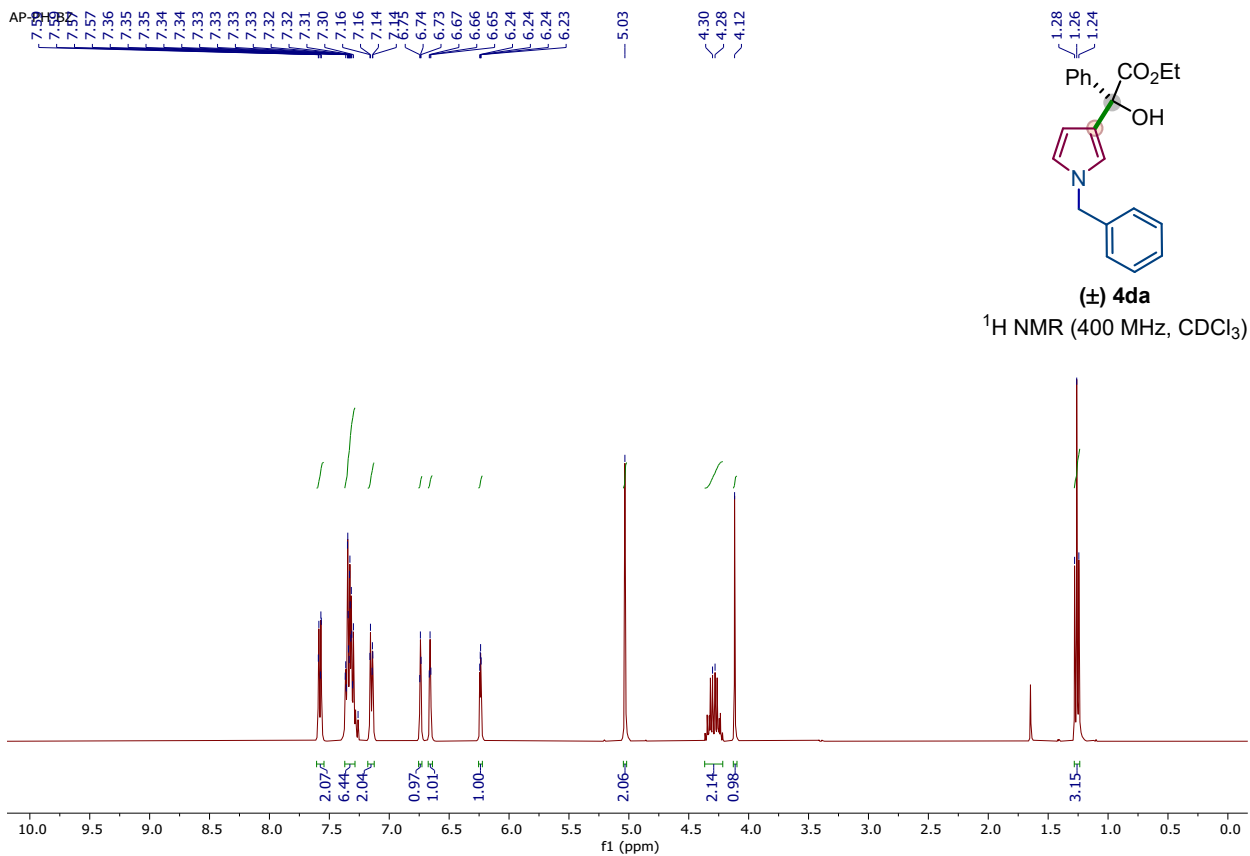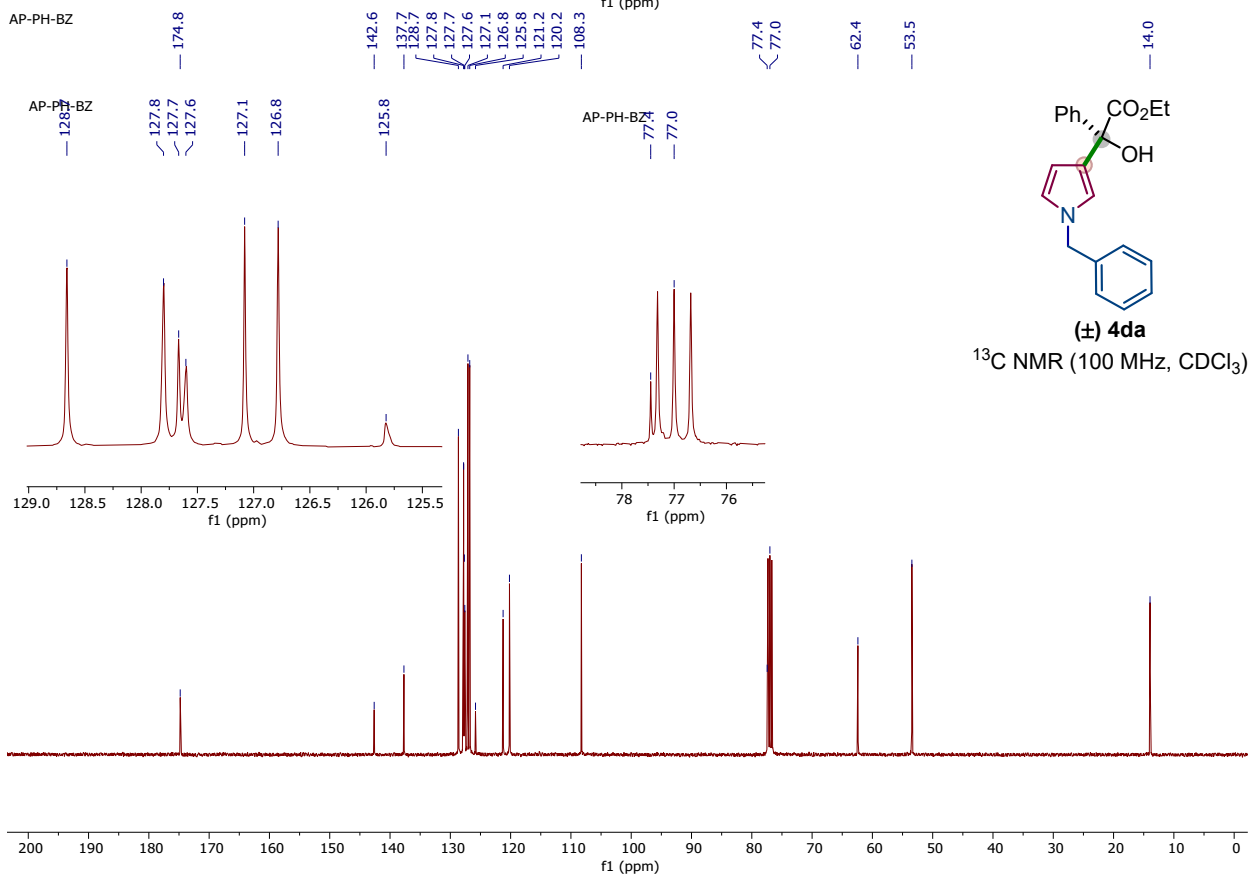

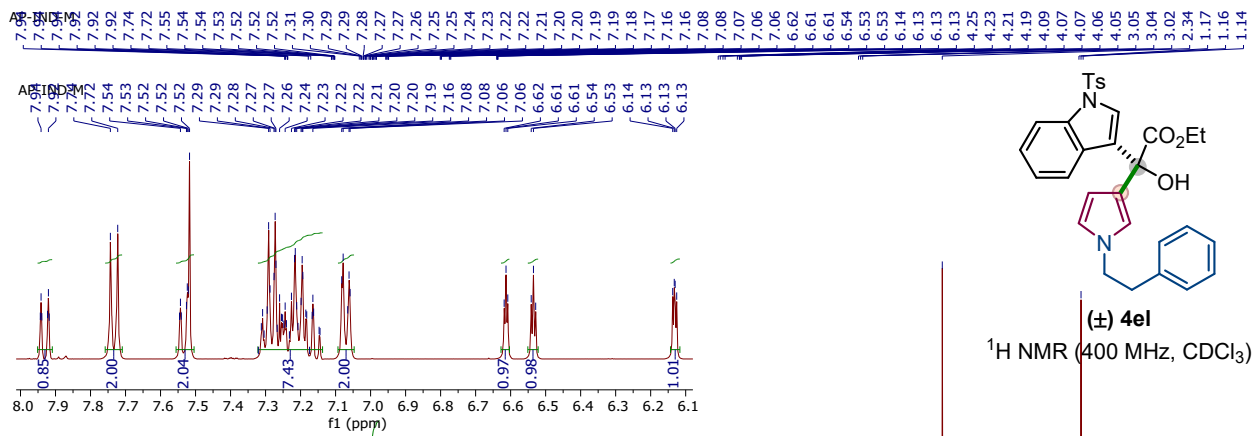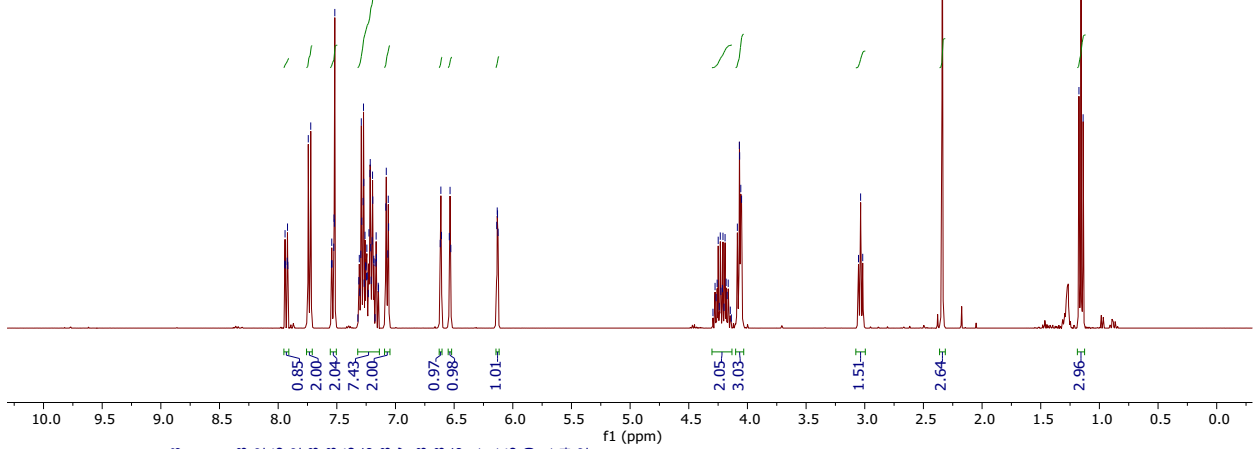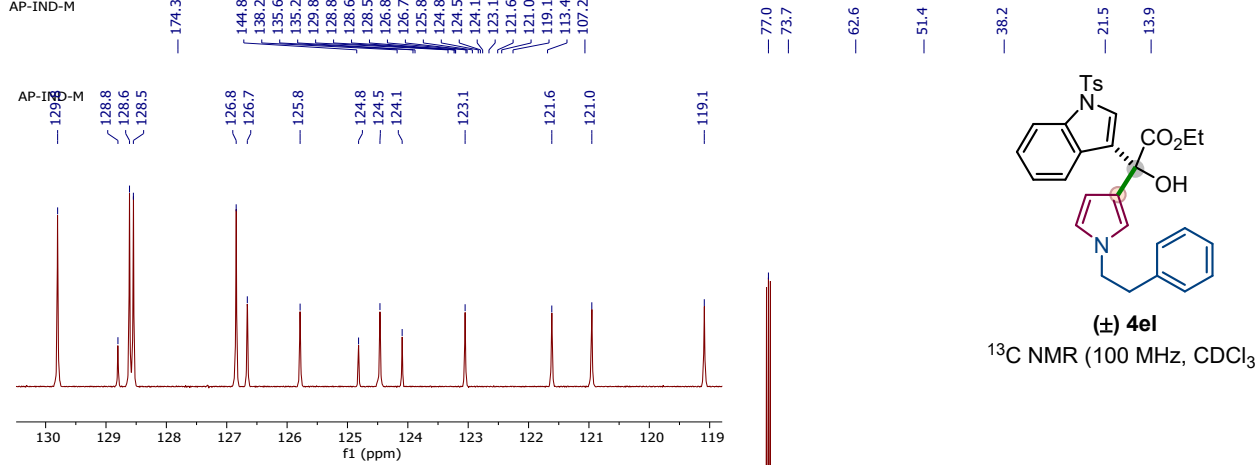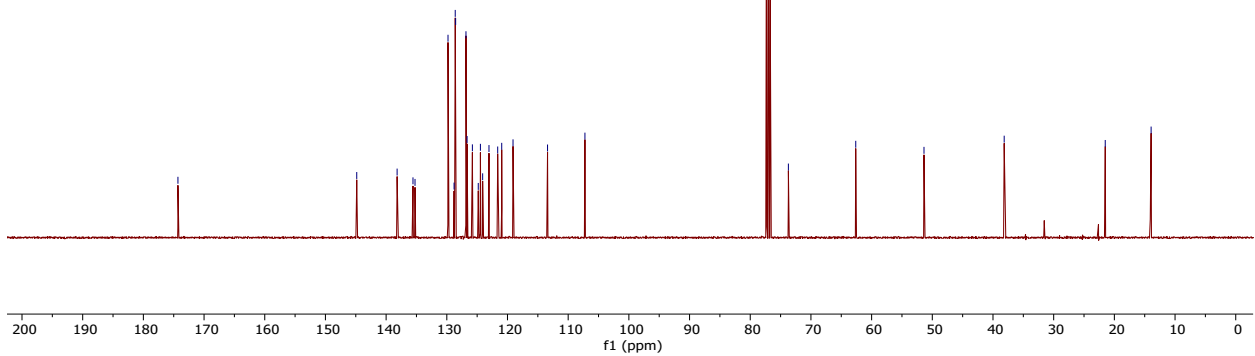

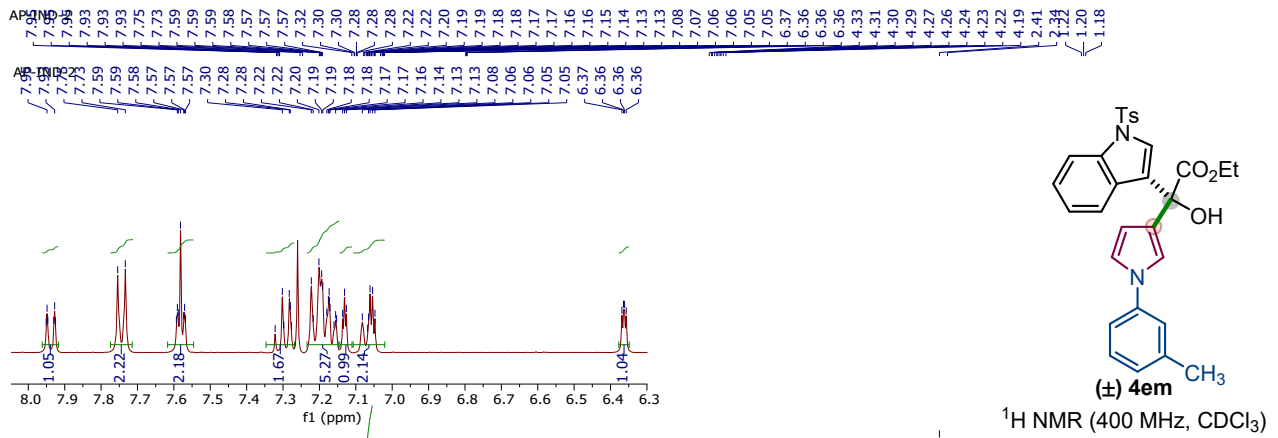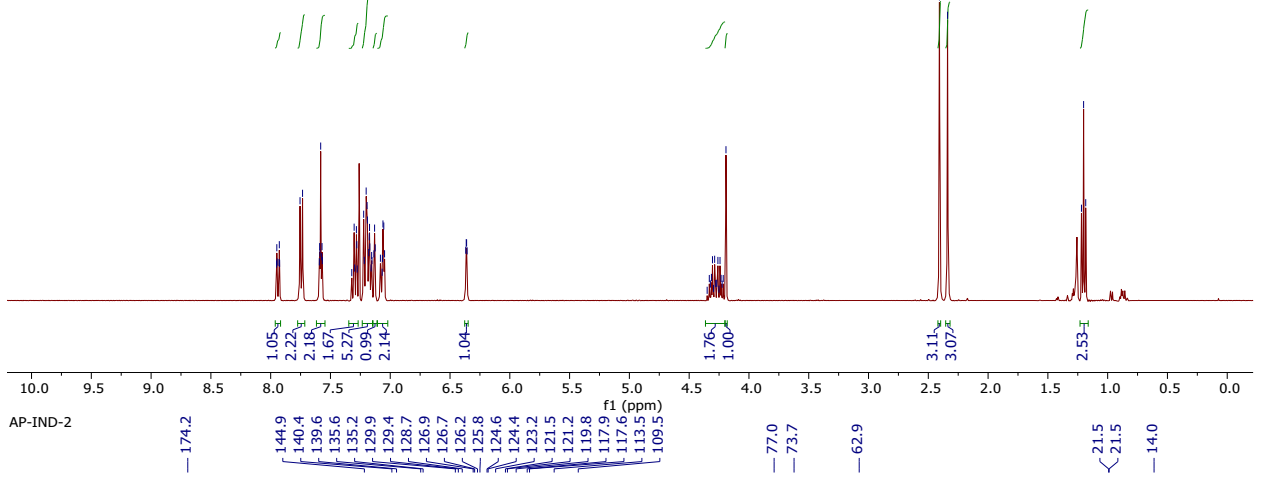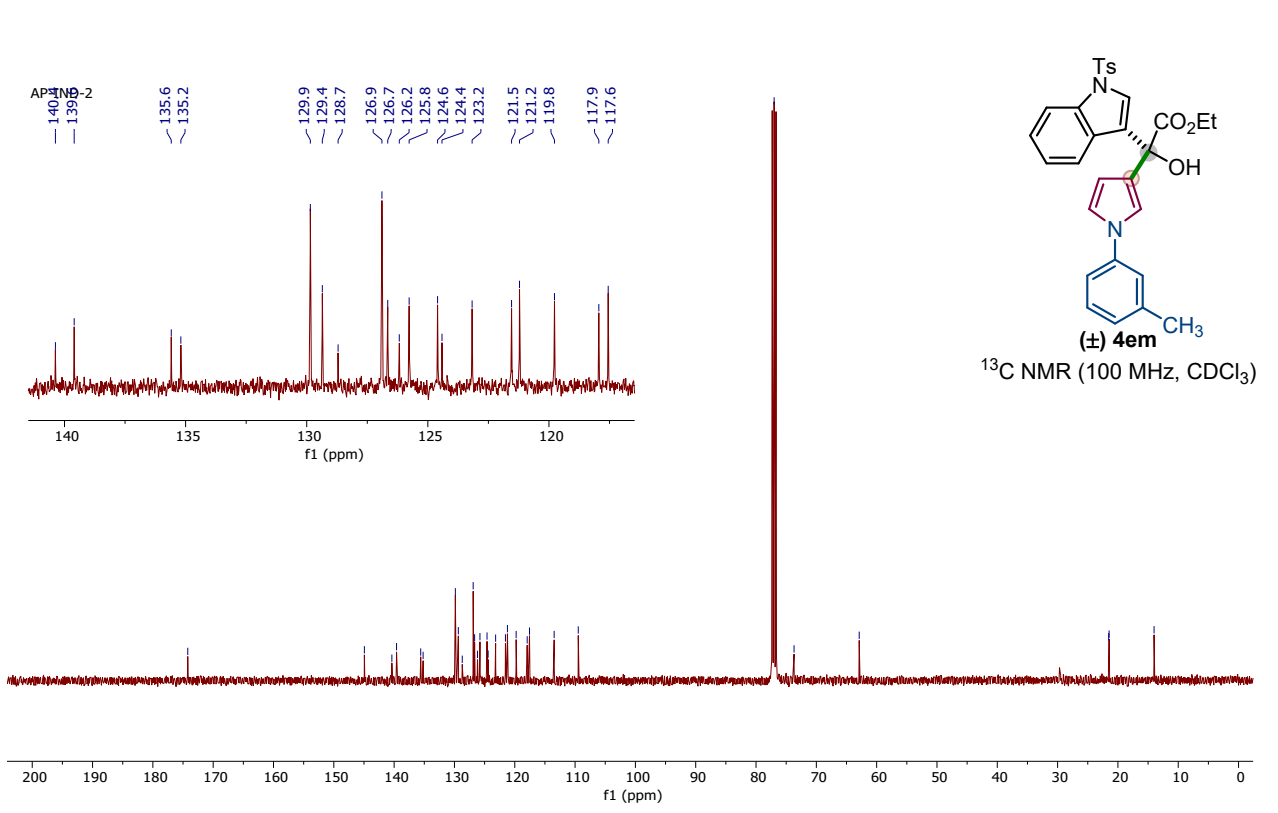

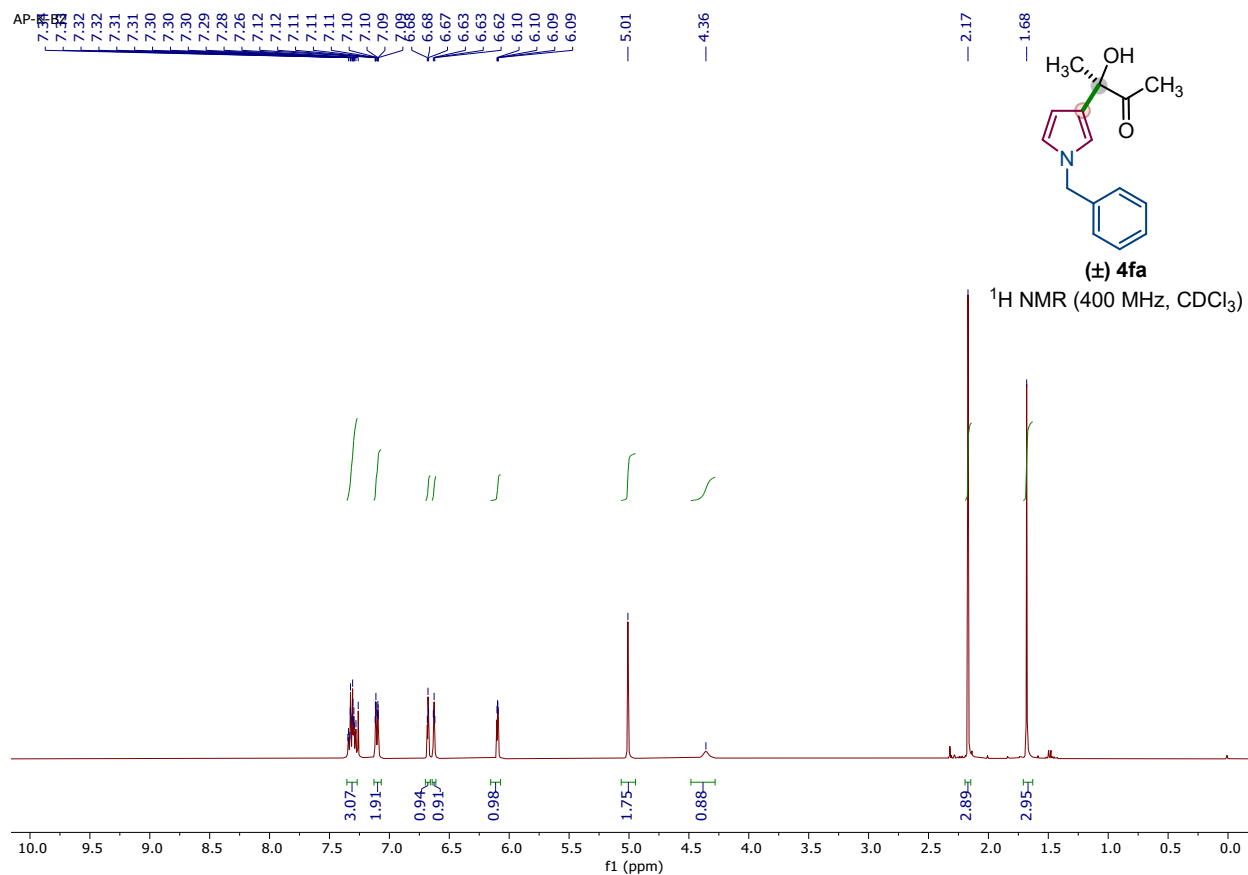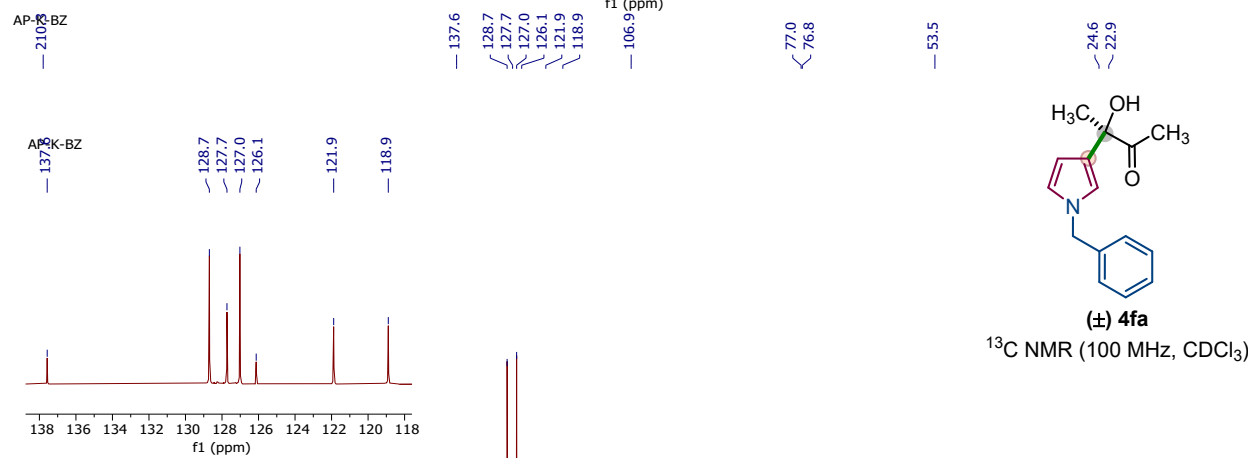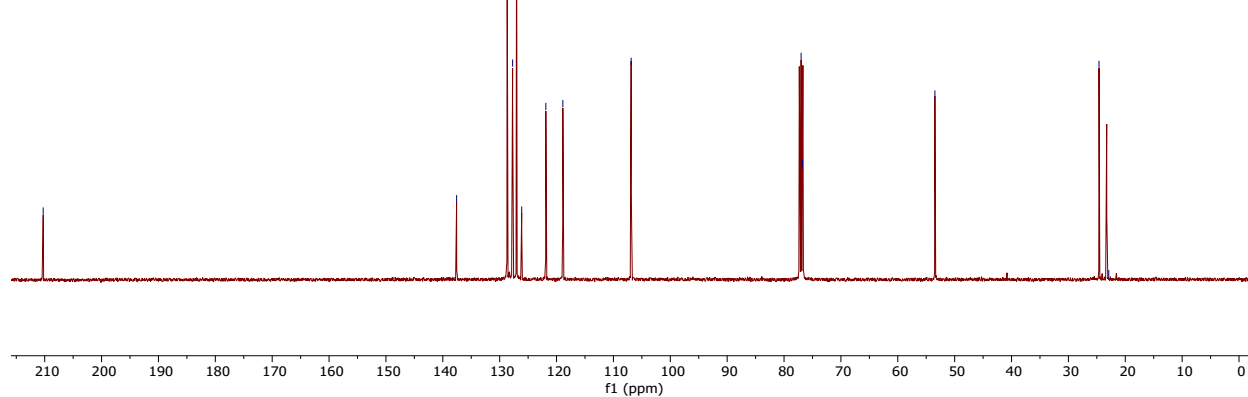

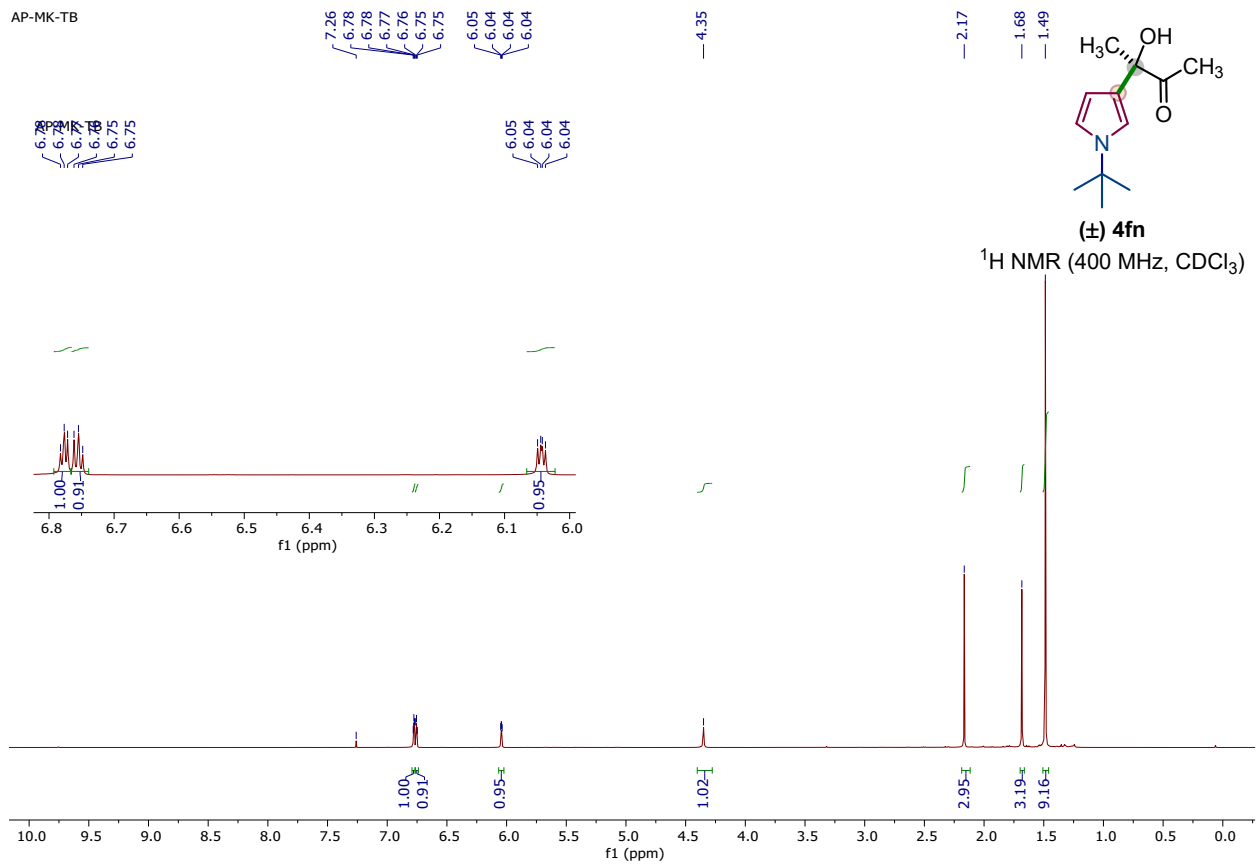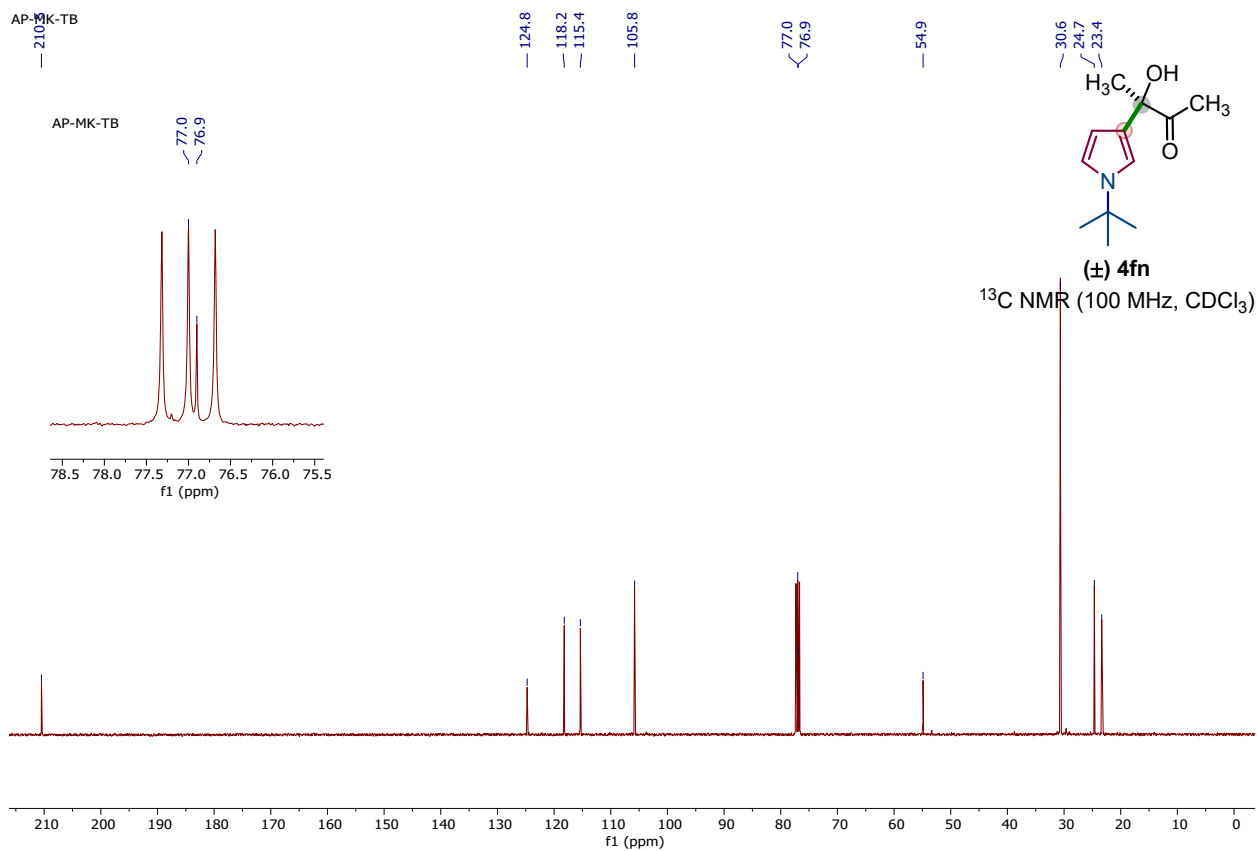

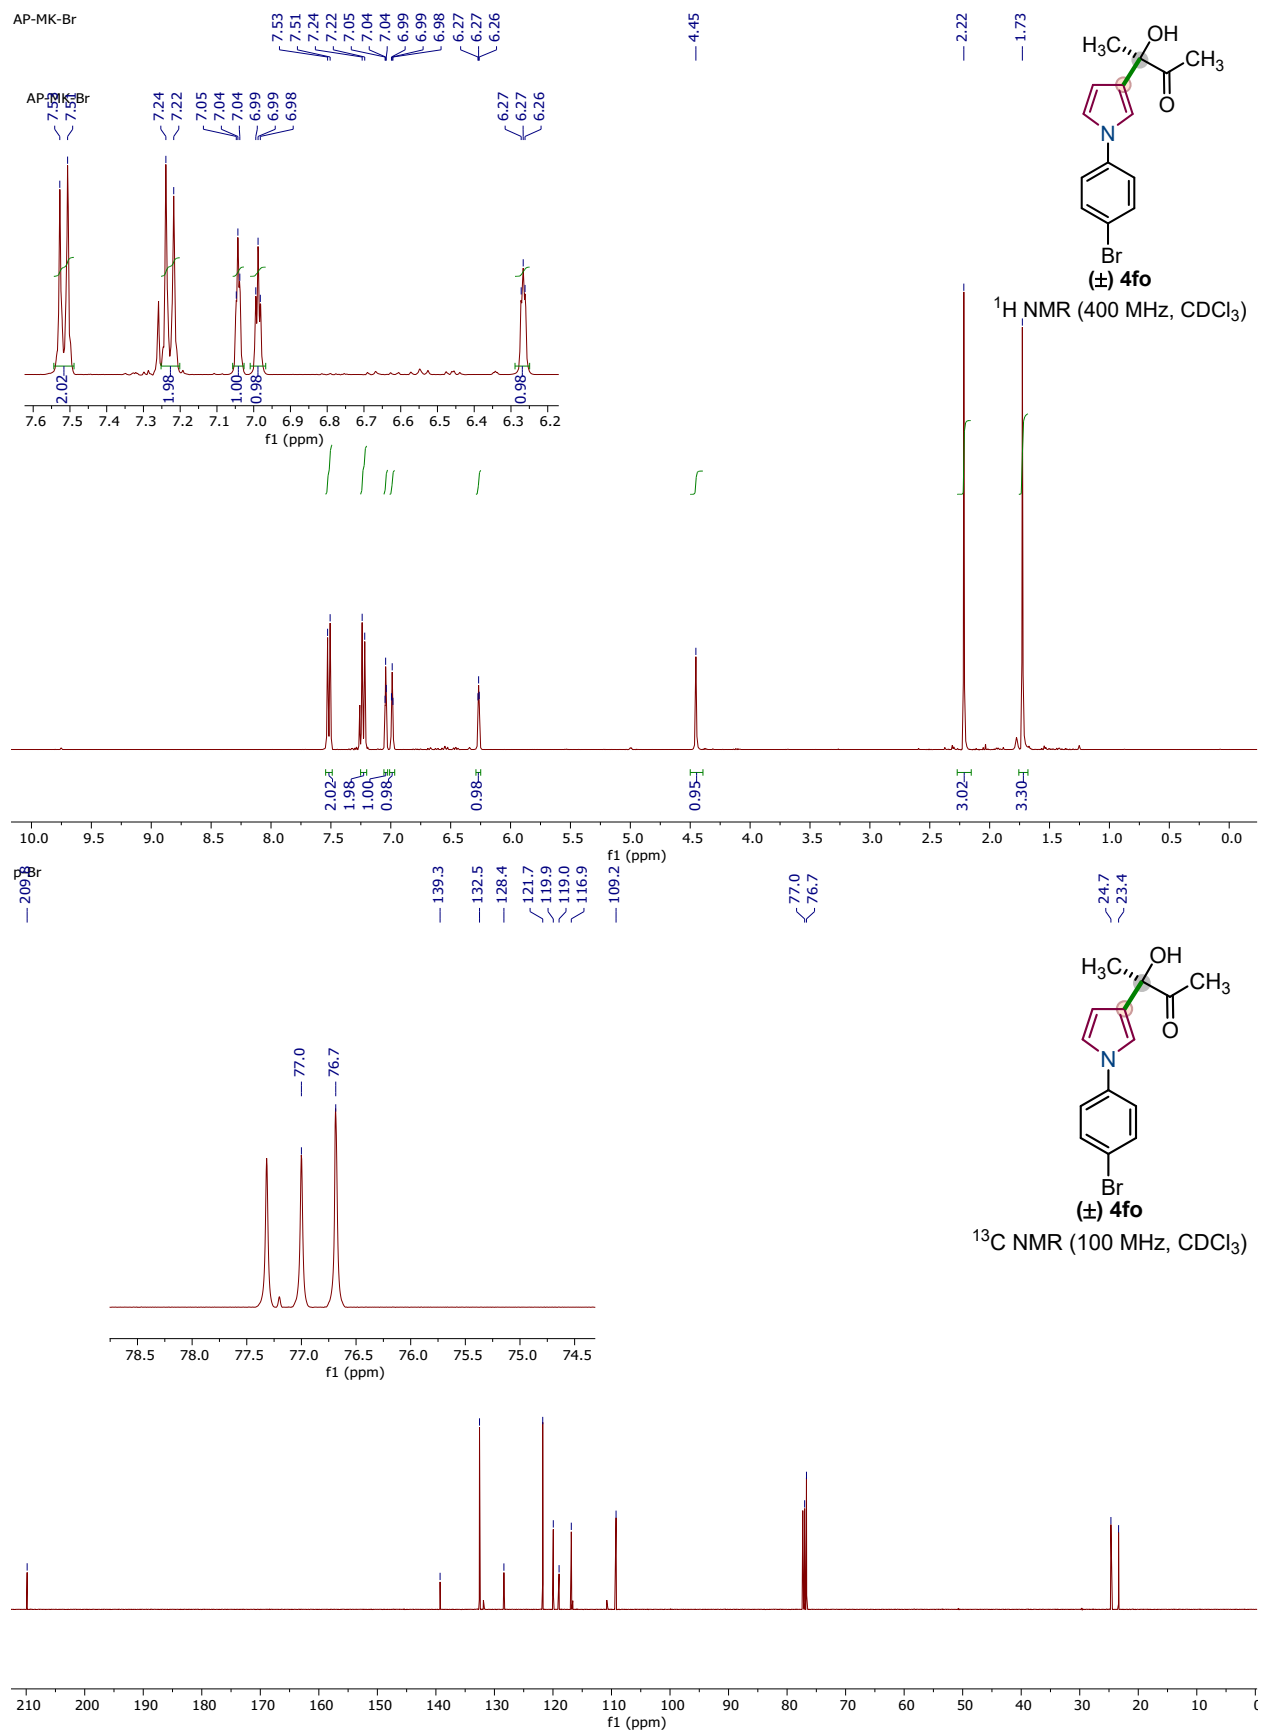

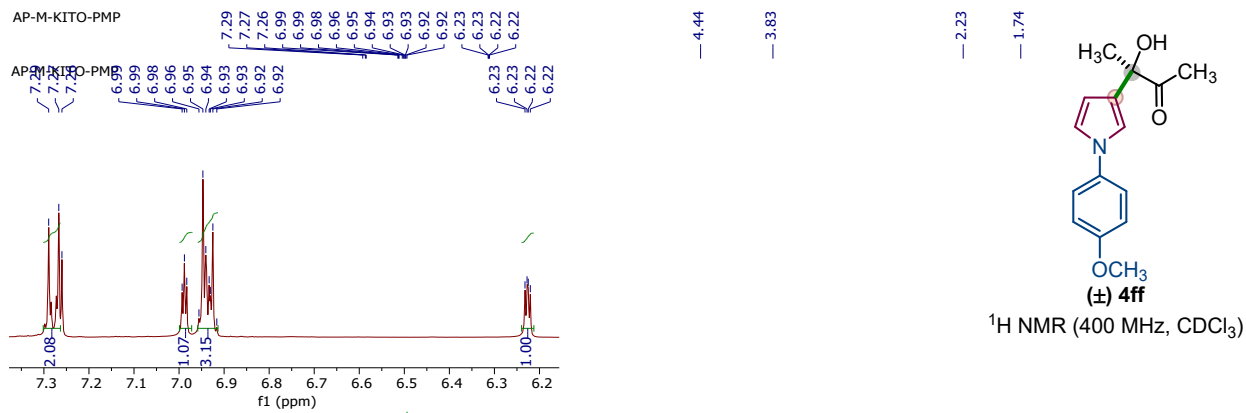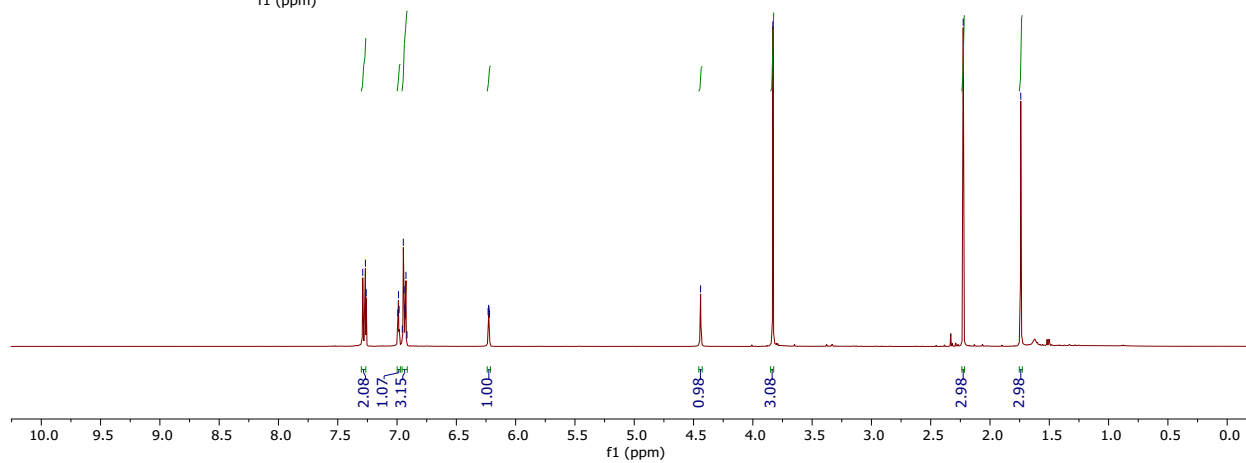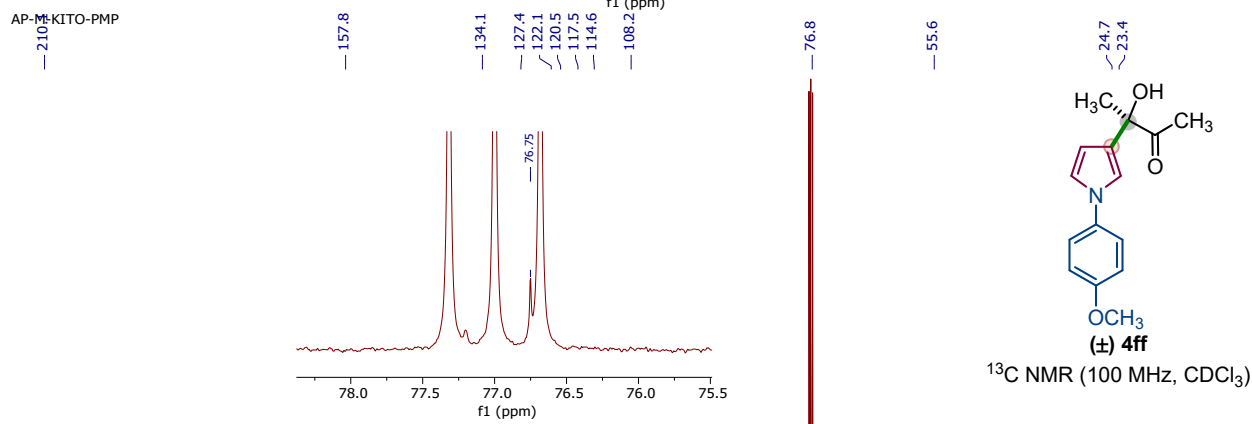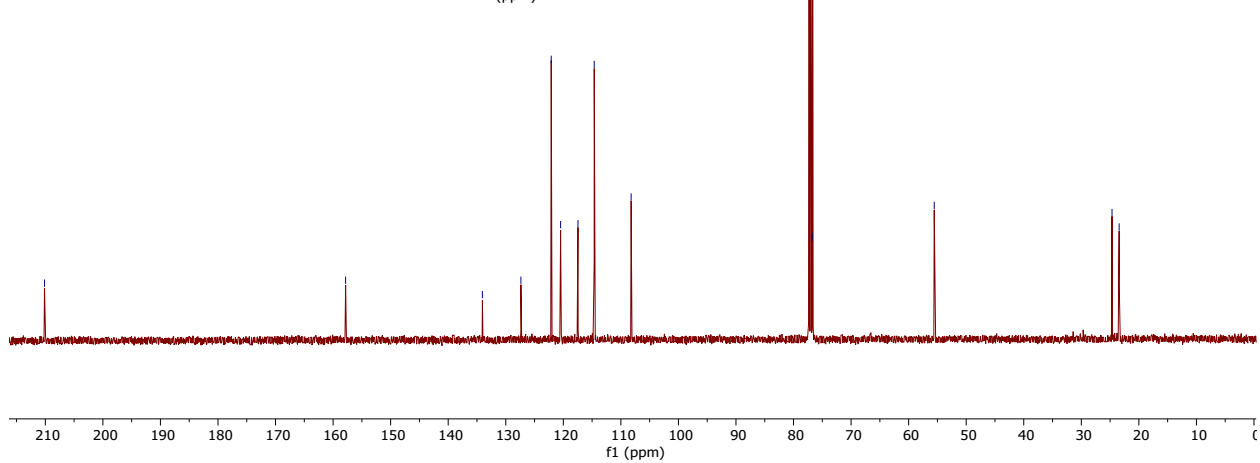



7.68  
7.68  
7.68  
7.67  
7.67  
7.66  
7.66  
7.45  
7.45  
7.44  
7.44  
7.43  
7.43  
7.37  
7.37  
7.37  
7.36  
7.35  
7.35  
7.35  
7.34  
7.34  
7.28  
7.28  
7.27  
7.27  
7.26  
7.26  
7.25  
7.25  
7.24  
7.24  
7.23  
7.23  
7.22  
7.22  
7.21  
7.21  
7.20  
7.20  
7.20  
7.18  
7.18  
7.17  
7.17  
7.16  
7.16  
6.99  
6.99  
6.98  
6.98  
6.97  
6.97  
6.55  
6.55  
6.54  
6.54  
6.54  
6.54  
6.05  
6.05  
6.04  
6.04  
6.03  
6.03  
5.09  
4.89

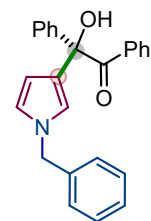

(±) 4ga

<sup>1</sup>H NMR (400 MHz, CDCl<sub>3</sub>)

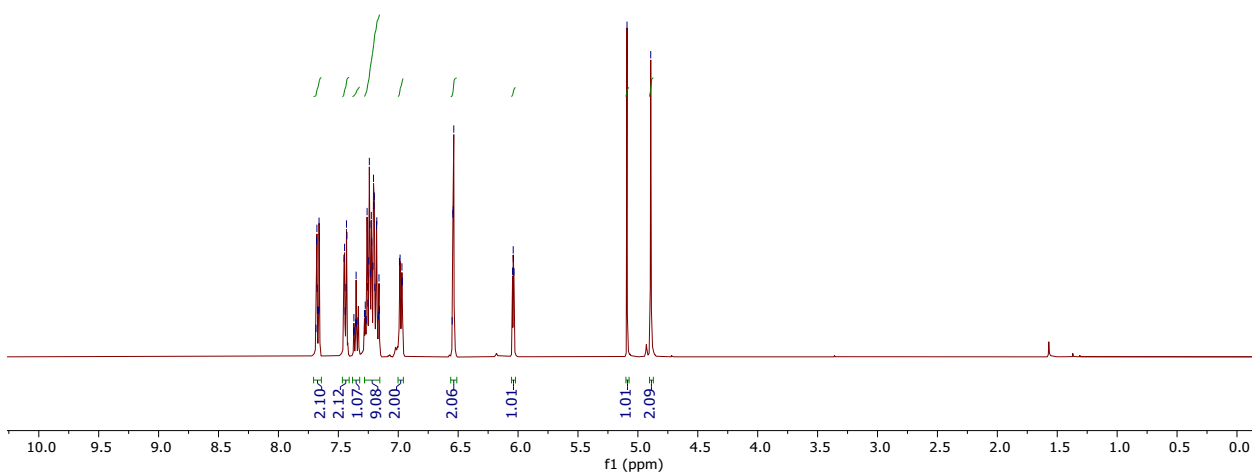

AP-PH-BZ

AP-PH-BZ

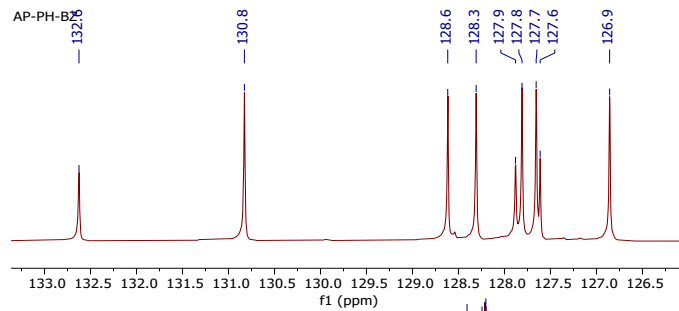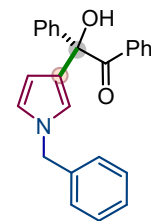

(±) 4ga

<sup>13</sup>C NMR (100 MHz, CDCl<sub>3</sub>)

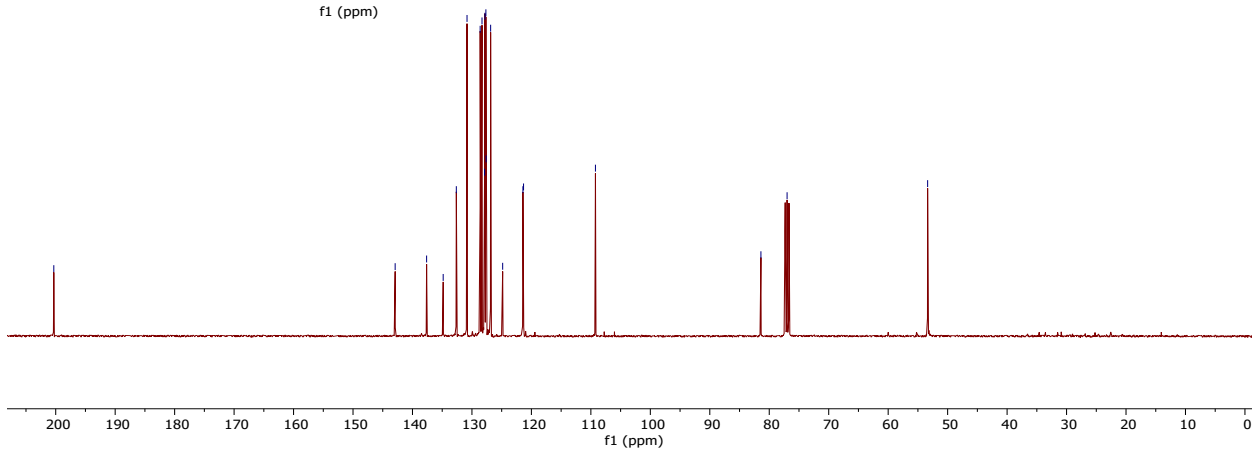

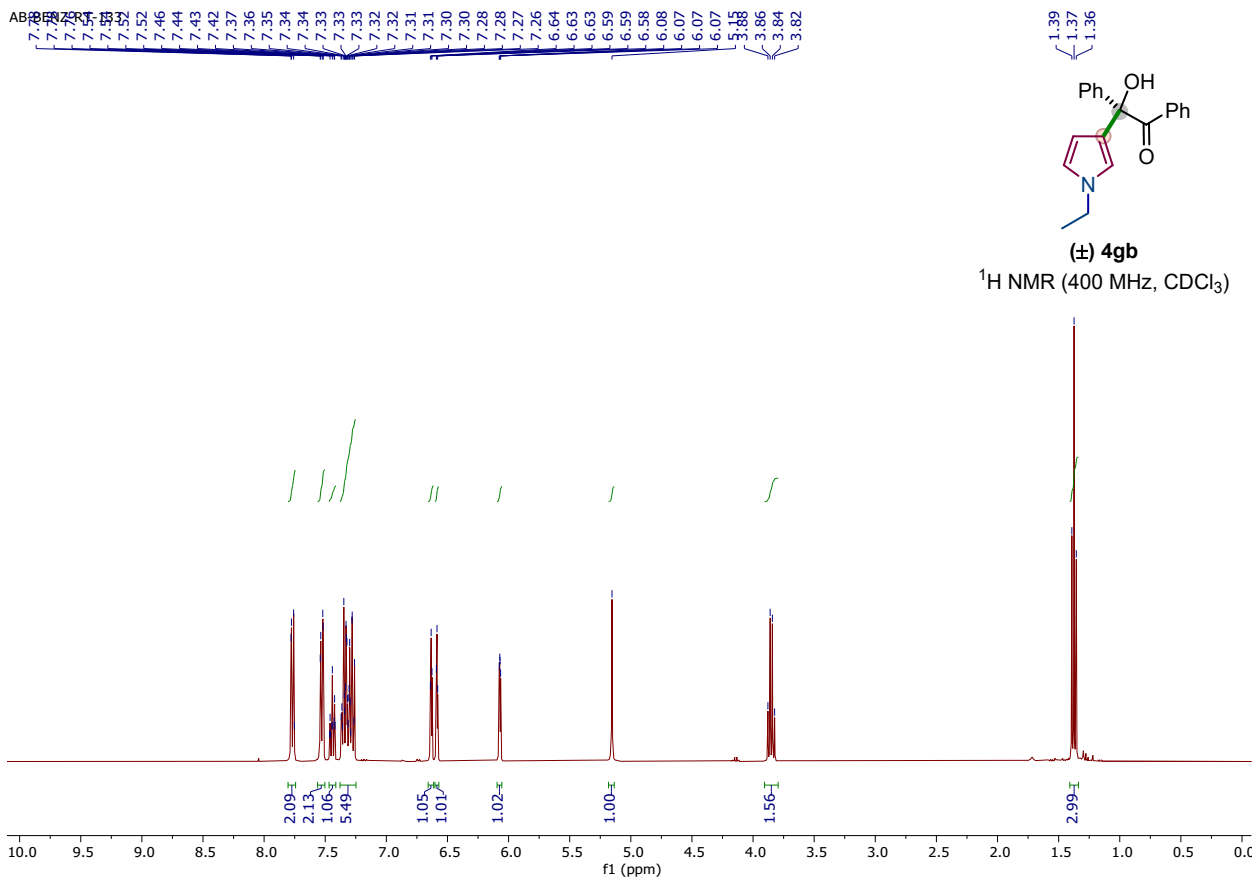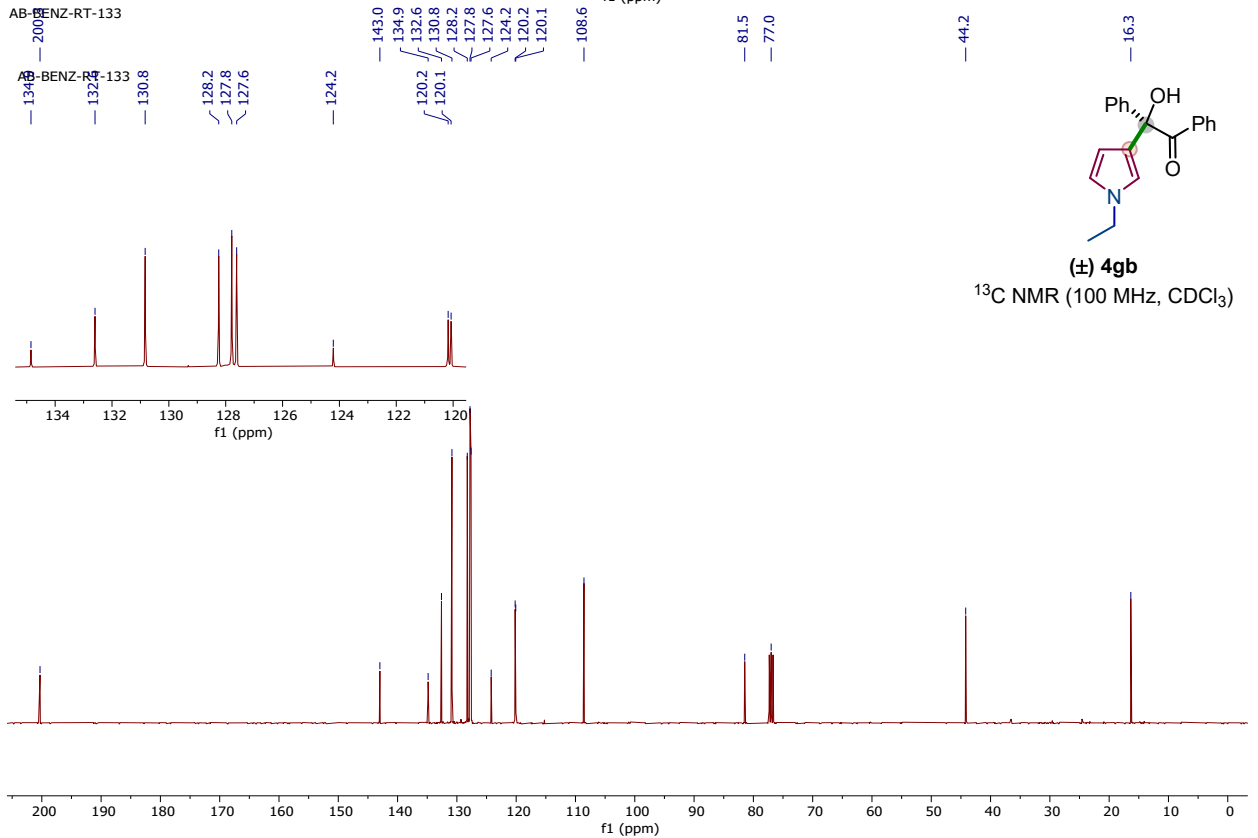

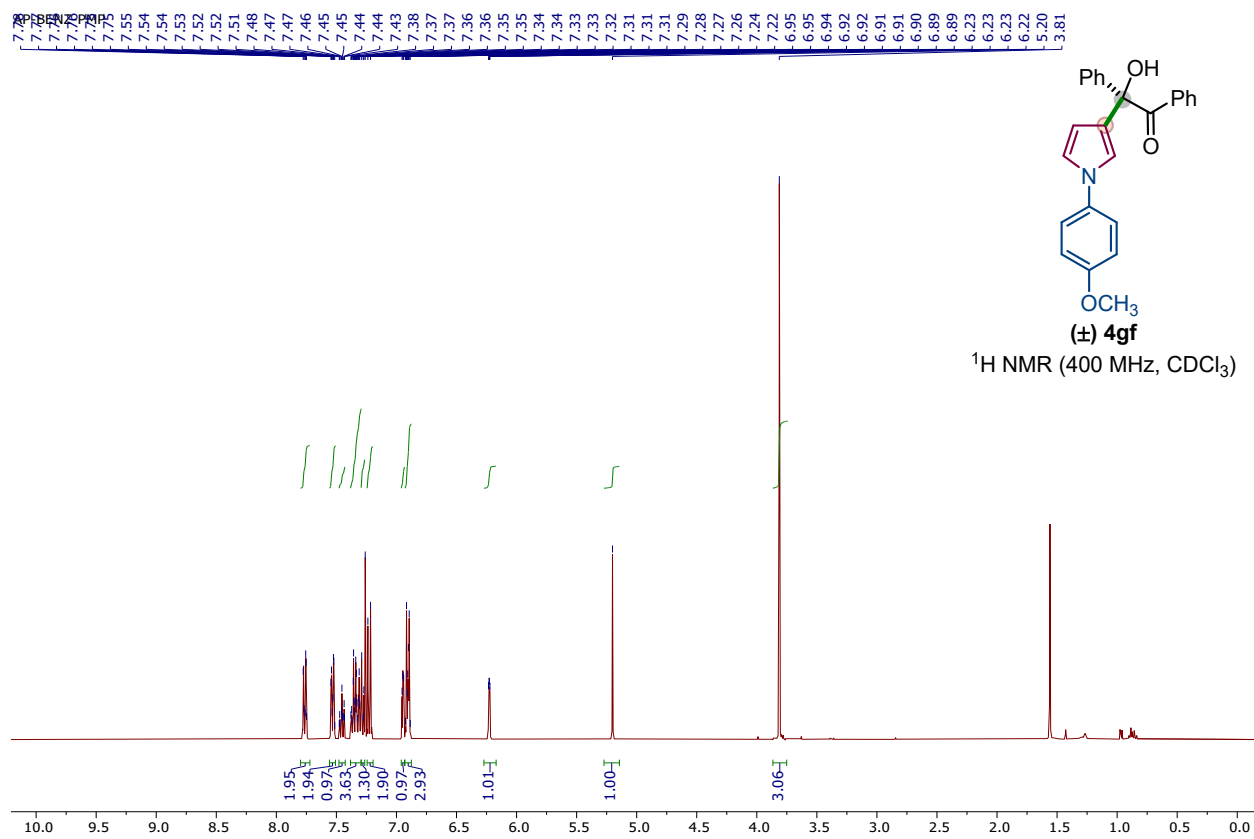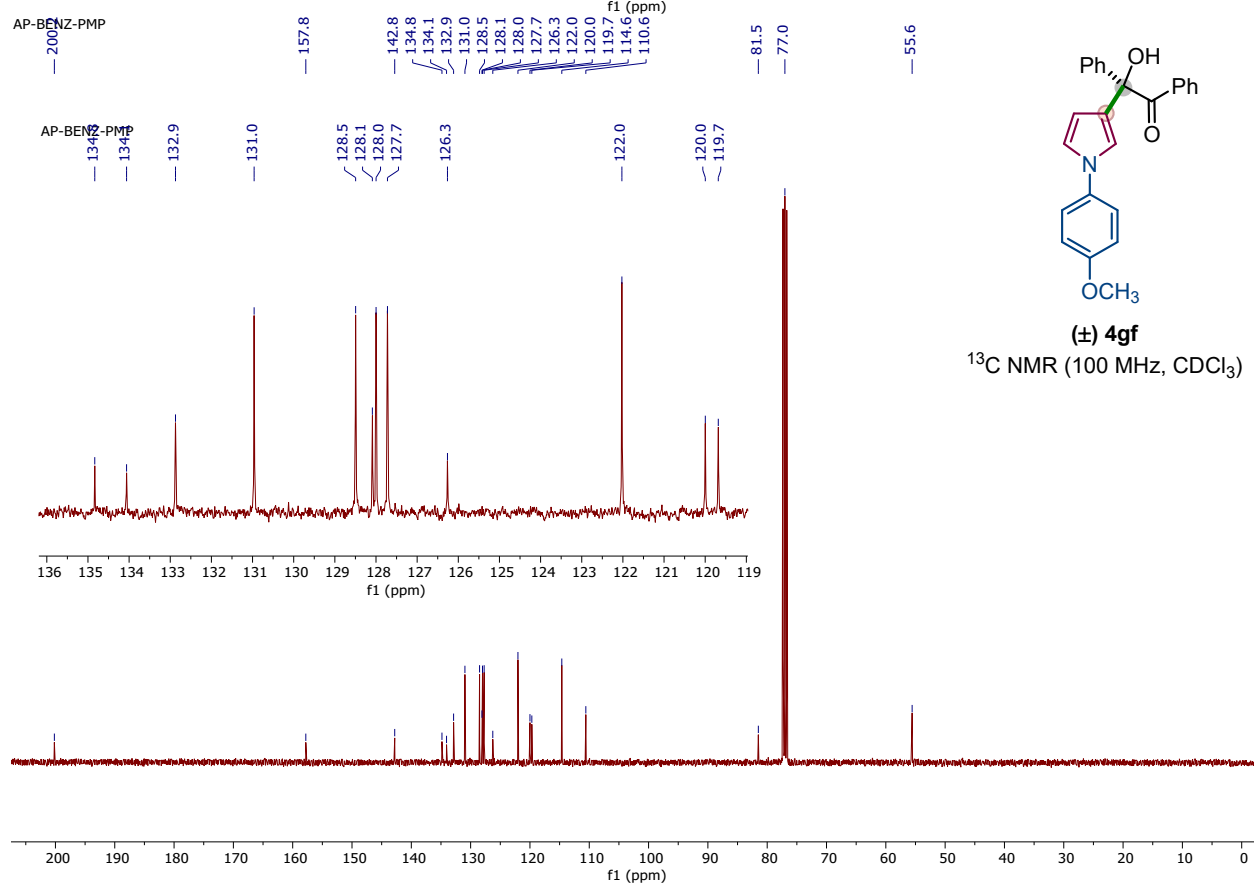

7.74  
7.73  
7.72  
7.71  
7.70  
7.69  
7.68  
7.67  
7.66  
7.65  
7.64  
7.63  
7.62  
7.61  
7.60  
7.59  
7.58  
7.57  
7.56  
7.55  
7.54  
7.53  
7.52  
7.51  
7.50  
7.49  
7.48  
7.47  
7.46  
7.45  
7.44  
7.43  
7.42  
7.41  
7.40  
7.39  
7.38  
7.37  
7.36  
7.35  
7.34  
7.33  
7.32  
7.31  
7.30  
7.29  
7.28  
7.27  
7.26  
7.25  
7.24  
7.23  
7.22  
7.21  
7.20  
7.19  
7.18  
7.17  
7.16  
7.15  
7.14  
7.13  
7.12  
7.11  
7.10  
7.09  
7.08  
7.07  
7.06  
7.05  
7.04  
7.03  
7.02  
7.01  
7.00  
6.99  
6.98  
6.97  
6.96  
6.95  
6.94  
6.93  
6.92  
6.91  
6.90  
6.89  
6.88  
6.87  
6.86  
6.85

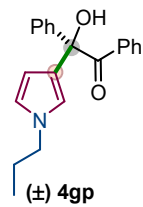

<sup>1</sup>H NMR (400 MHz, CDCl<sub>3</sub>)

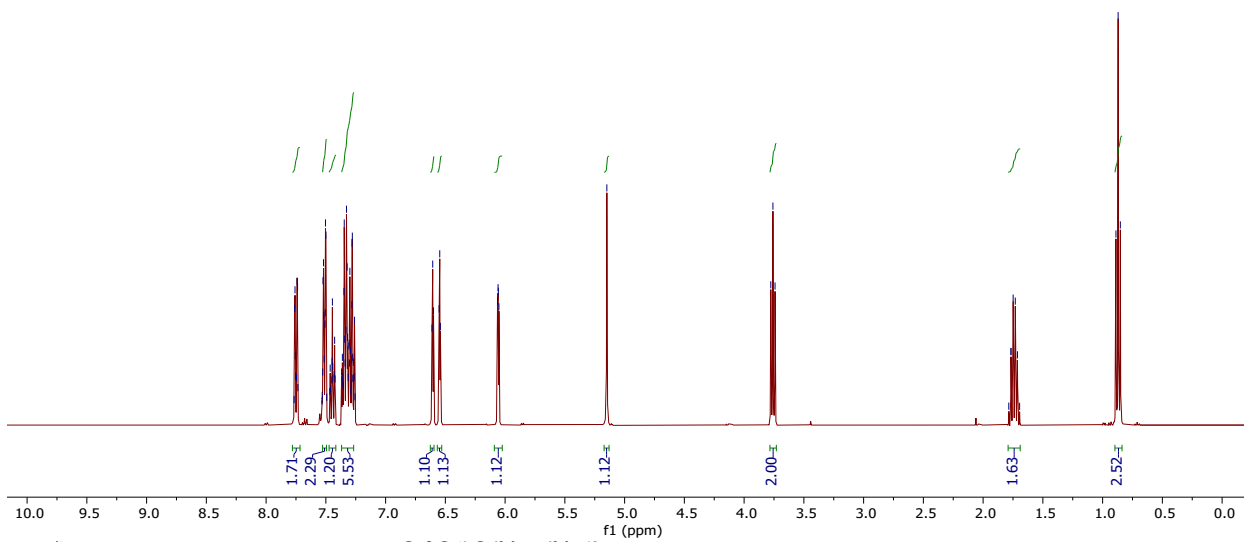

AP-BZCP

200°C

143.1  
134.9  
132.6  
130.9  
128.3  
127.9  
127.8  
127.7  
124.1  
120.8  
120.7  
108.5  
81.5  
77.0  
51.4  
24.6  
11.1

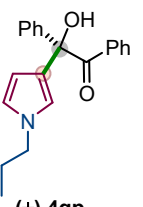

<sup>13</sup>C NMR (100 MHz, CDCl<sub>3</sub>)

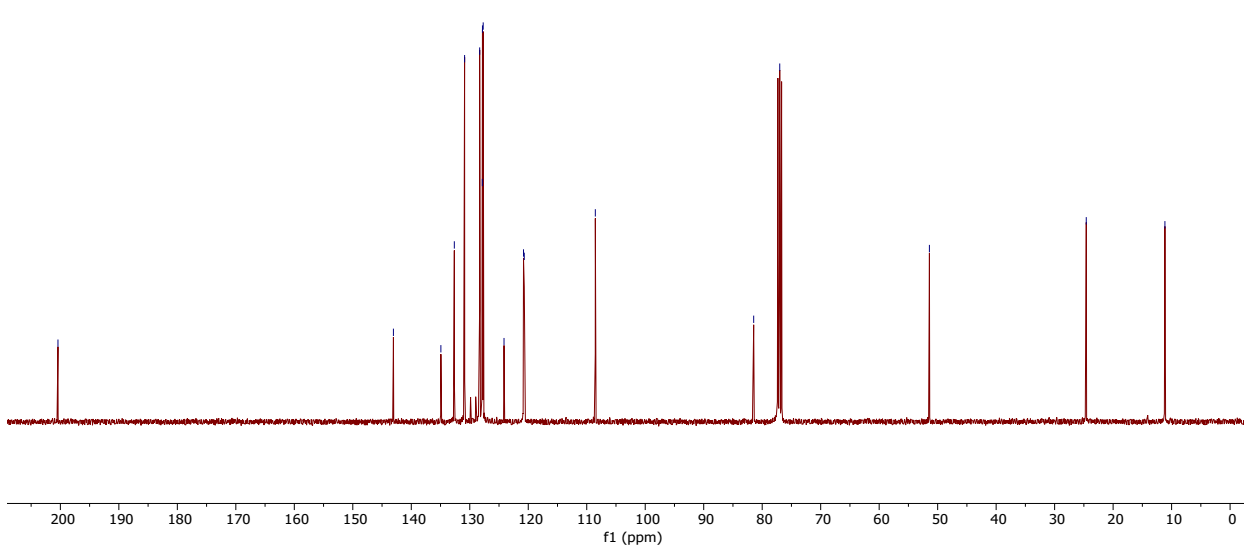

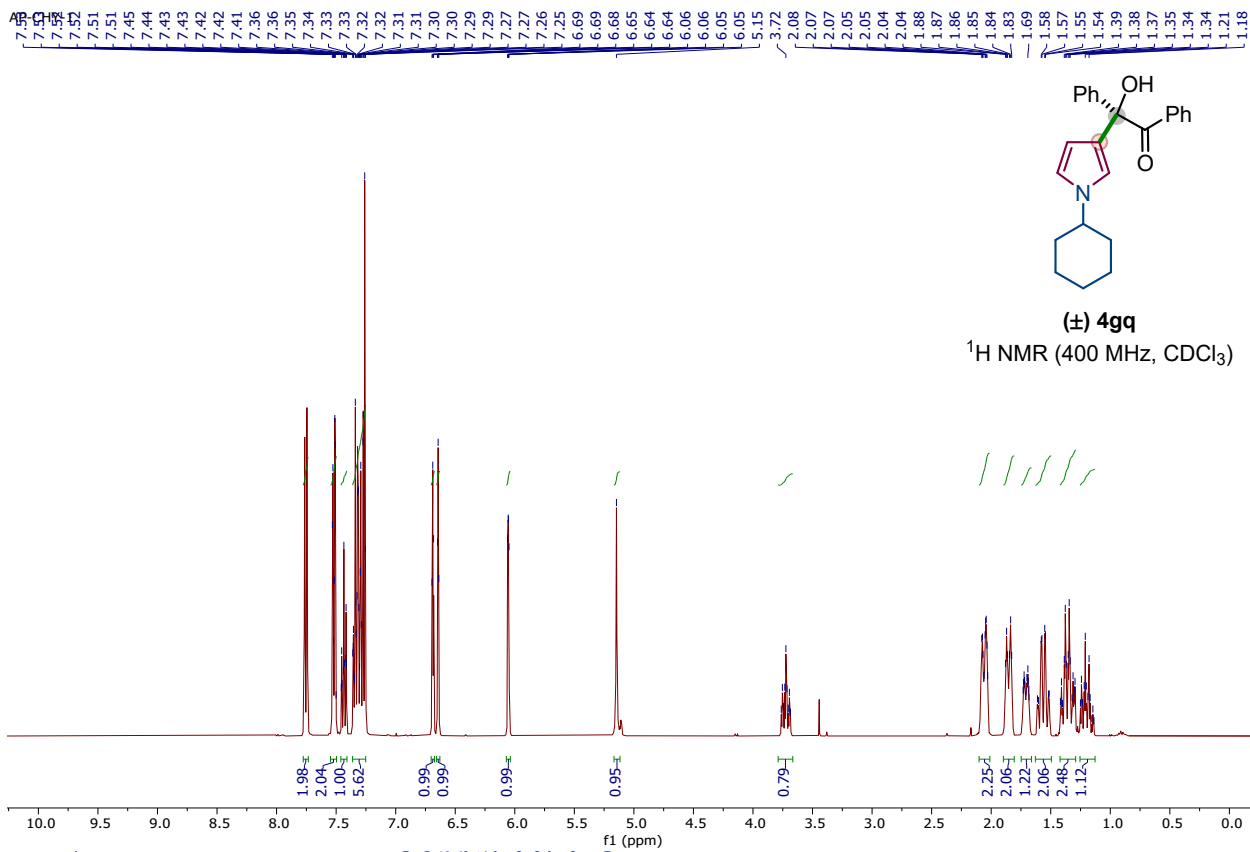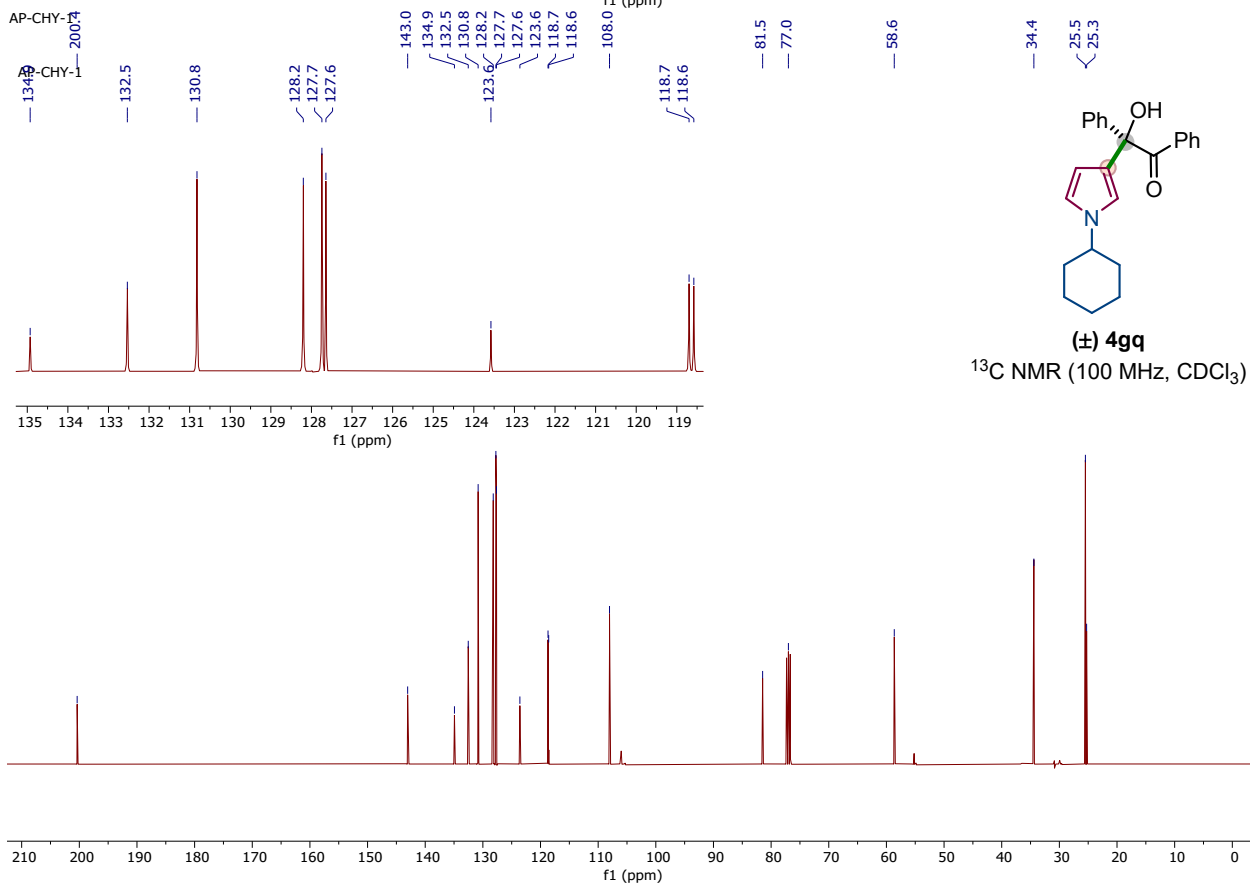

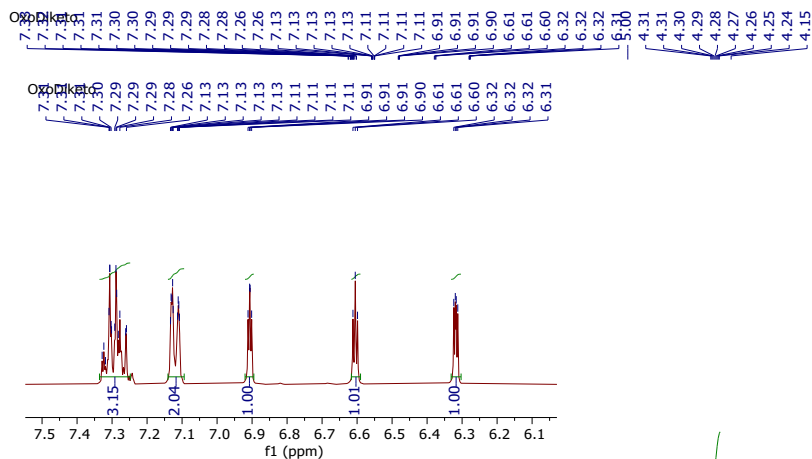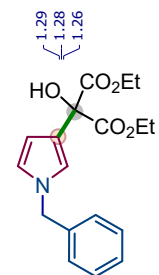

(±) 4ha

<sup>1</sup>H NMR (400 MHz, CDCl<sub>3</sub>)

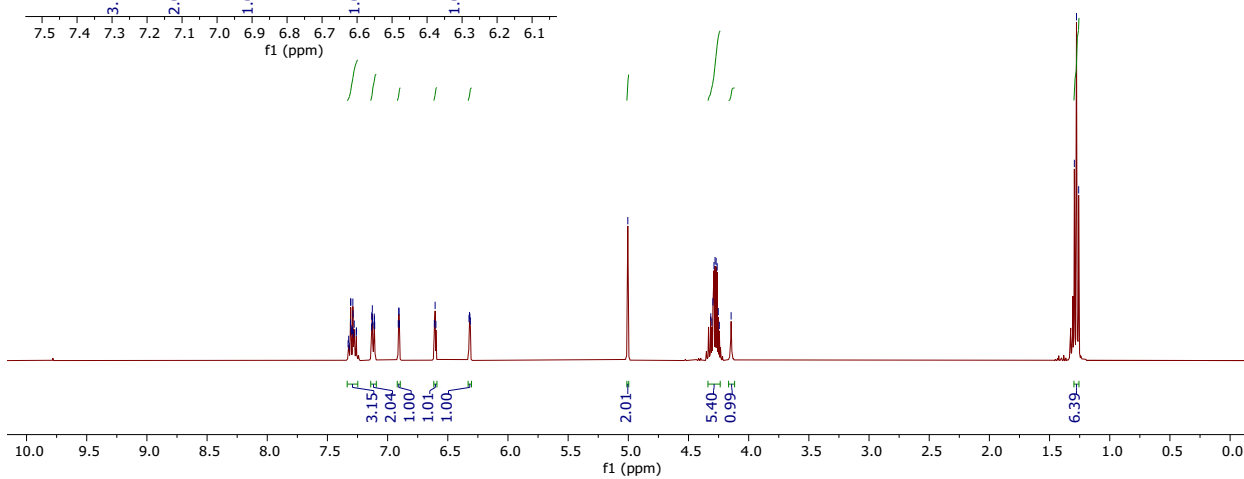

AP-DOKETO-BZ

170.1

137.5

128.5

127.6

127.1

121.0

120.1

119.7

108.0

77.0

63.2

62.4

53.4

AP-DOKETO-BZ

128.5

127.6

127.1

121.0

120.1

119.7

108.0

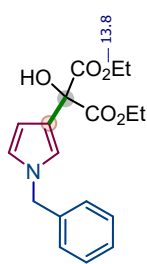

(±) 4ha

<sup>13</sup>C NMR (100 MHz, CDCl<sub>3</sub>)

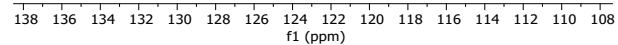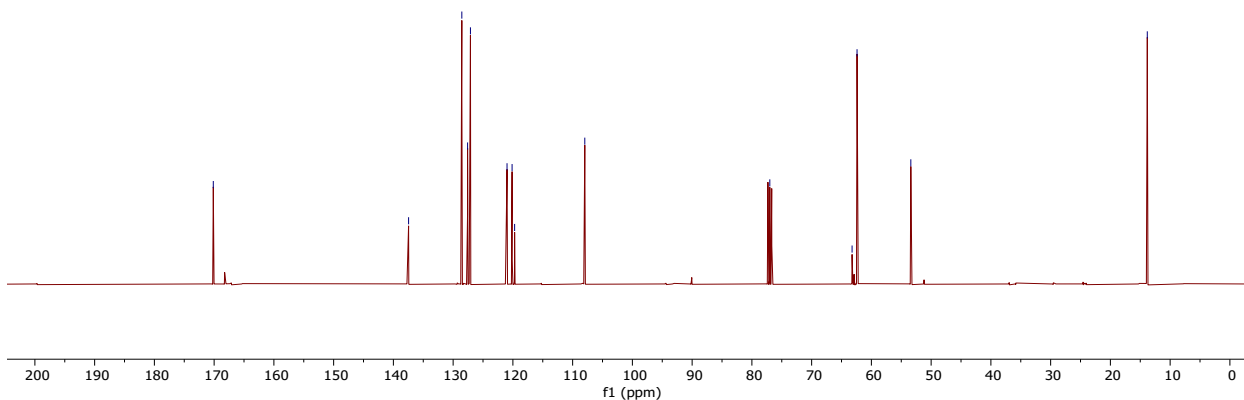



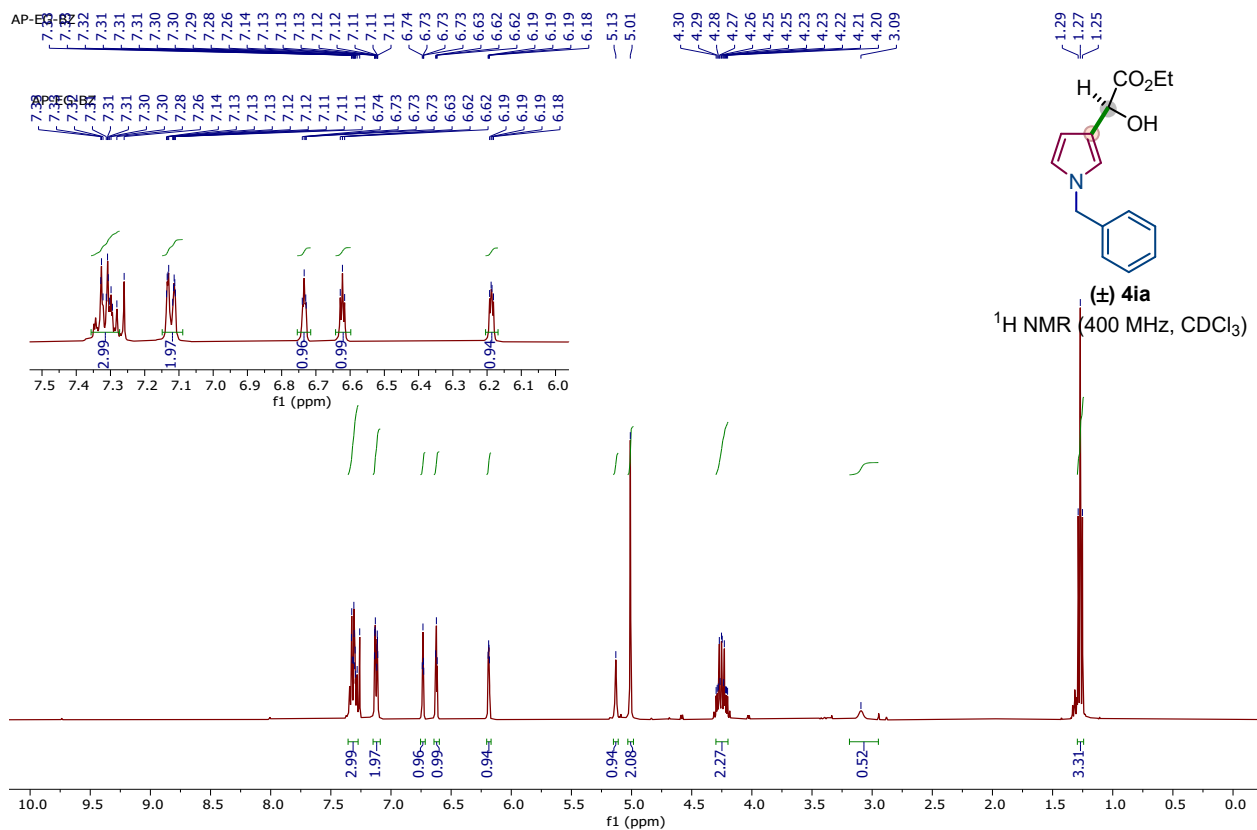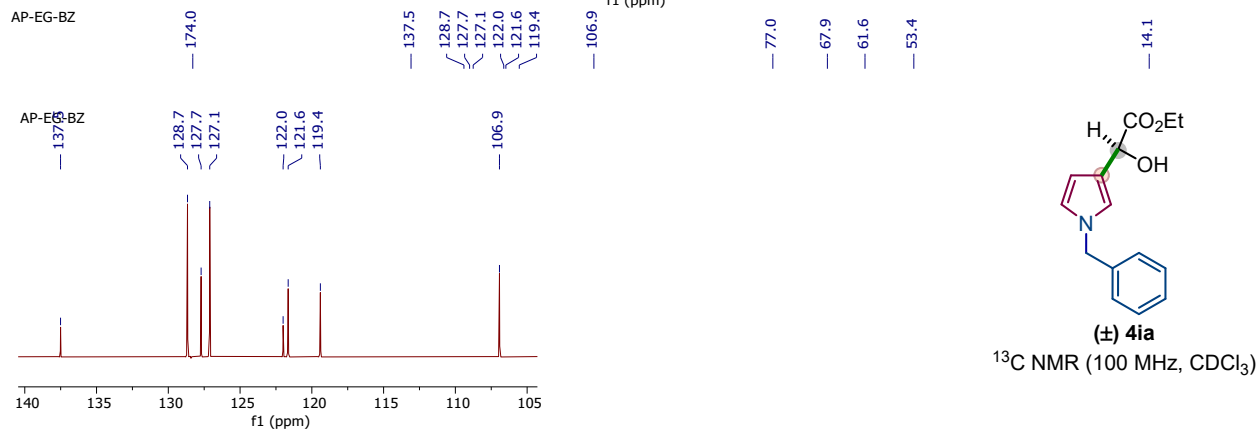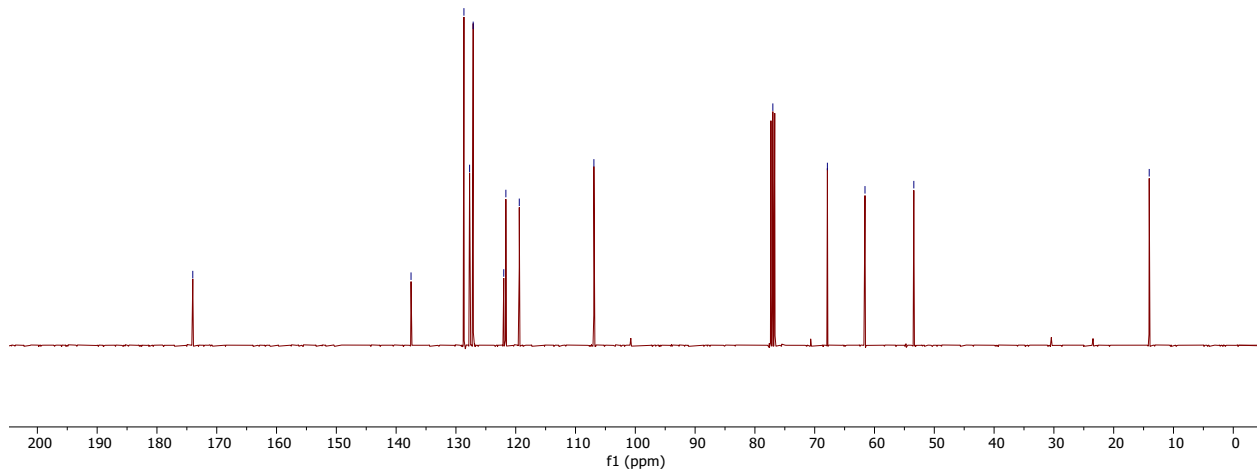



7.96  
7.96  
7.97  
7.97  
7.96  
7.96  
7.95  
7.95  
7.96  
7.96  
7.54  
7.54  
7.54  
7.52  
7.52  
7.43  
7.43  
7.41  
7.41  
7.41  
7.40  
7.39  
7.39  
7.28  
7.28  
7.28  
7.27  
7.27  
7.26  
7.26  
7.25  
7.25  
7.25  
7.00  
7.00  
7.00  
6.99  
6.99  
6.99  
6.98  
6.98  
6.98  
6.66  
6.65  
6.65  
6.57  
6.56  
6.55  
6.08  
6.08  
6.07  
6.07  
5.96  
5.94  
4.97  
4.18  
4.16

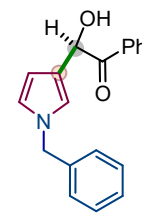

(±) 4ja

<sup>1</sup>H NMR (400 MHz, CDCl<sub>3</sub>)

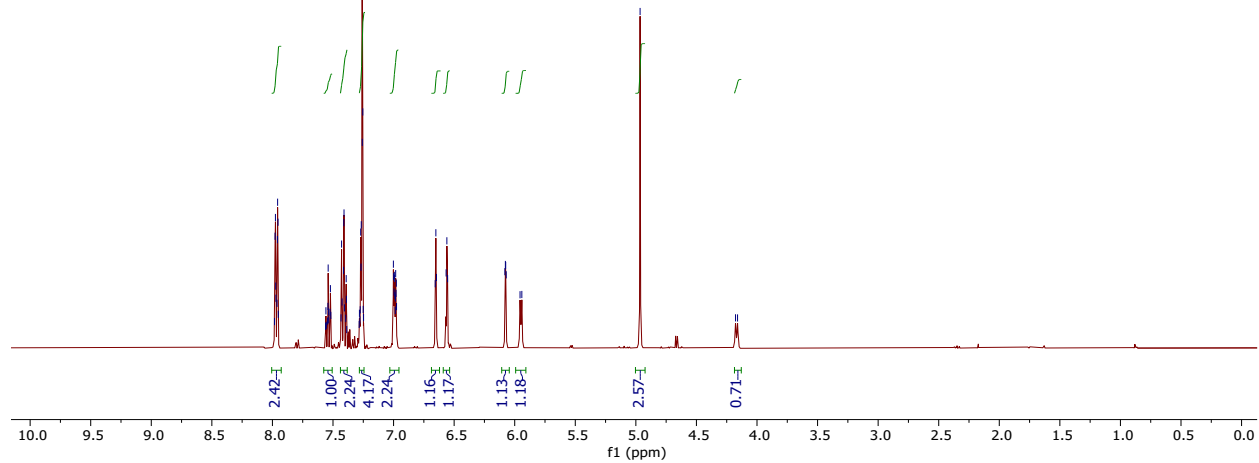

AP-G BN 199.8  
137.5  
133.9  
133.5  
129.1  
128.7  
128.5  
127.7  
126.9  
122.5  
122.1  
120.2  
107.8  
77.0  
70.1  
53.4

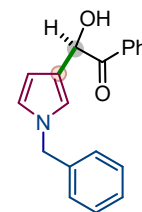

(±) 4ja

<sup>13</sup>C NMR (100 MHz, CDCl<sub>3</sub>)

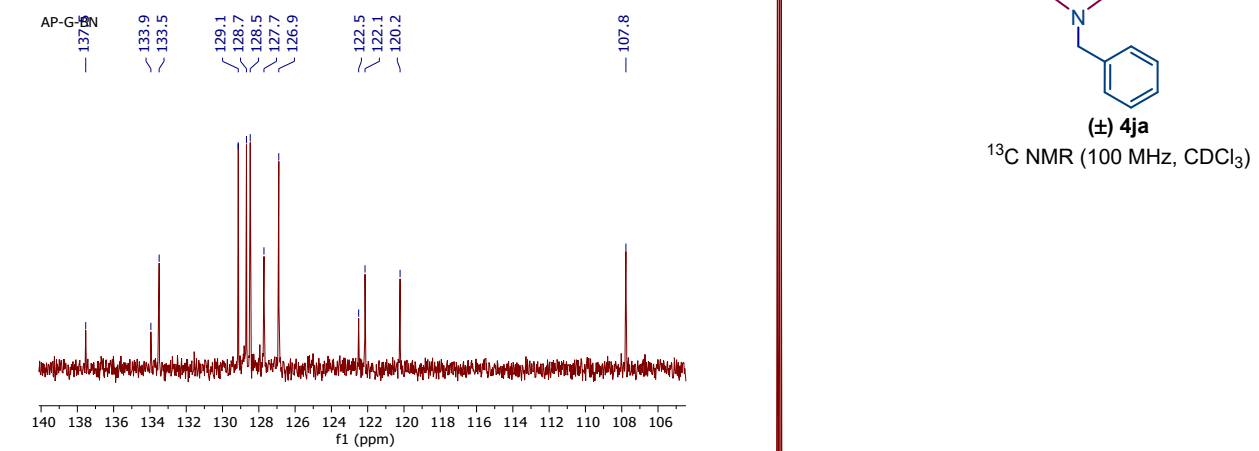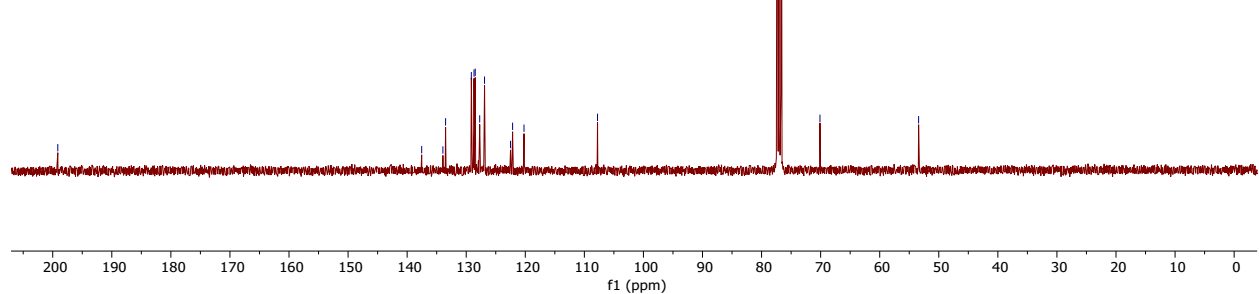

AP-Imine-TB-01

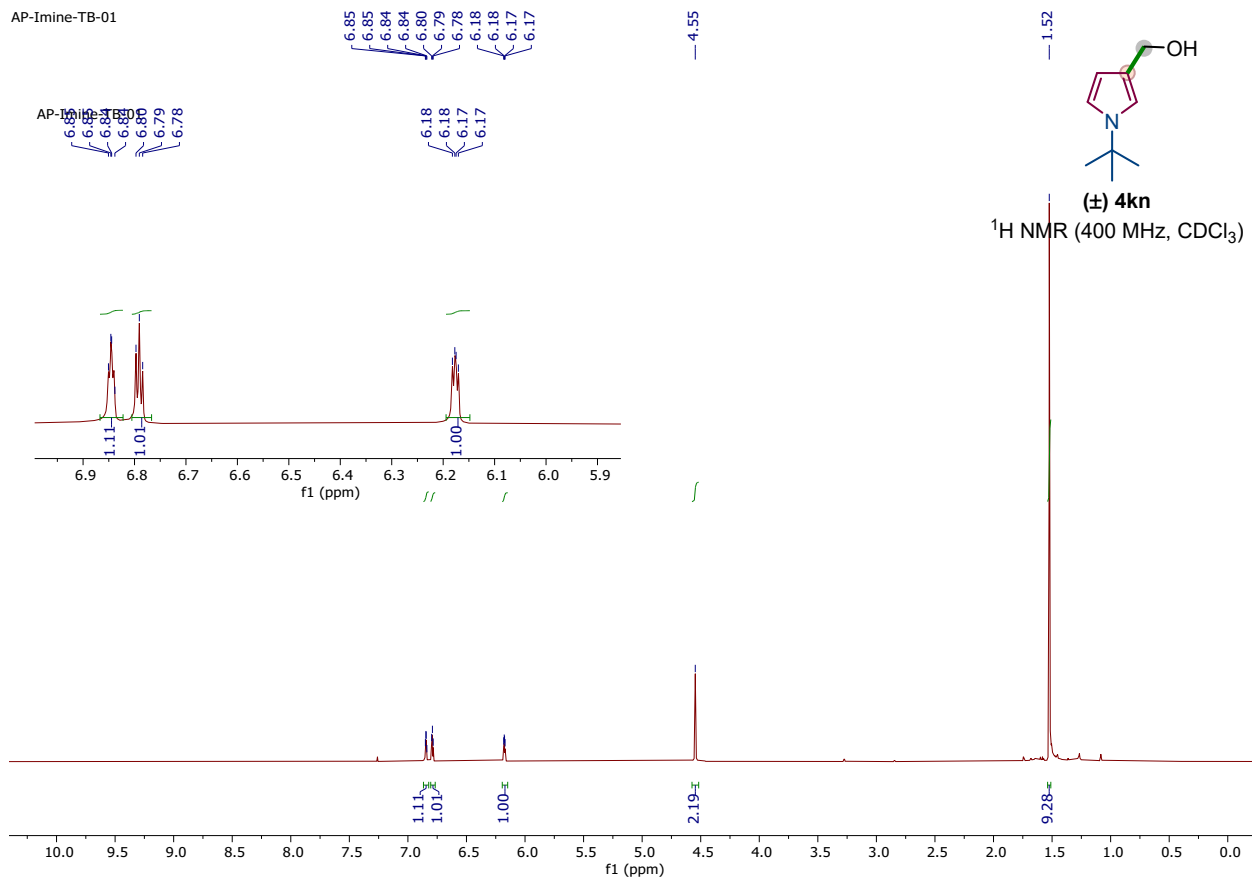

AP-Imine-TB-01

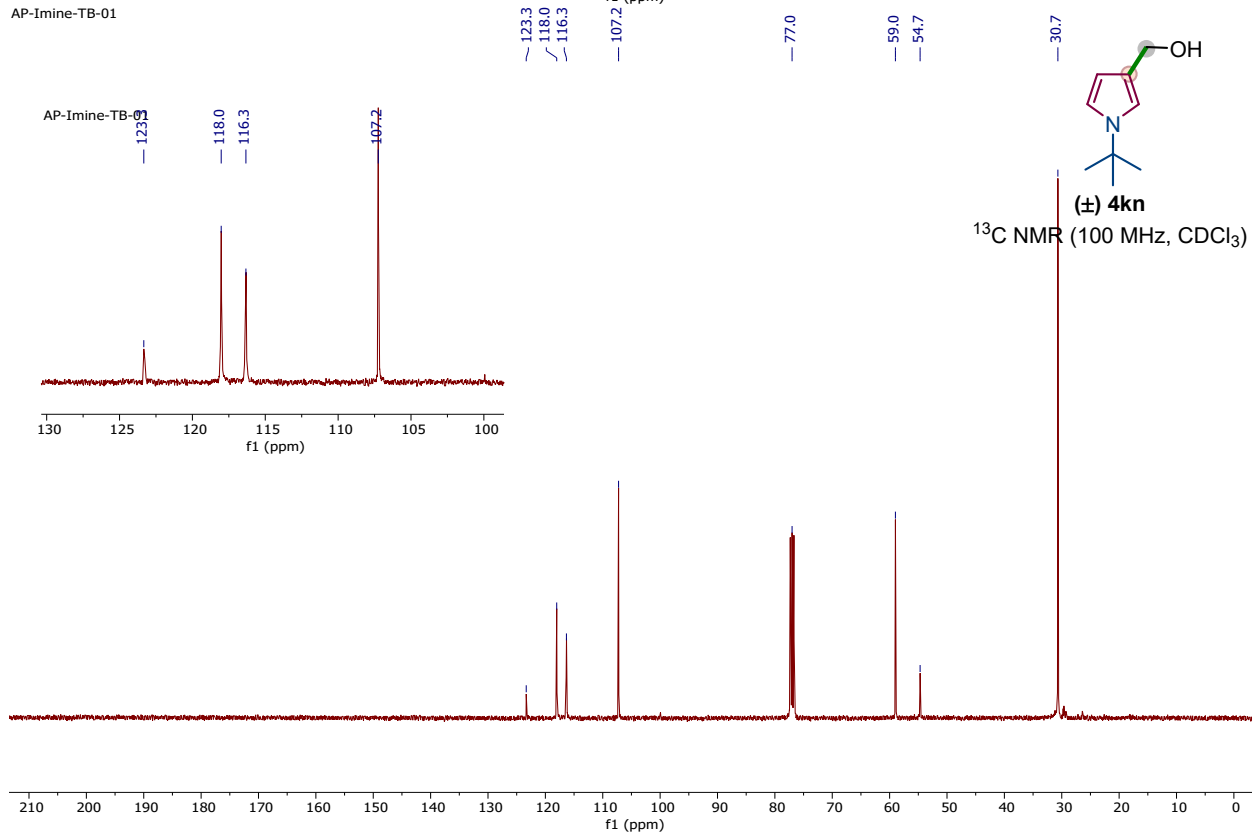

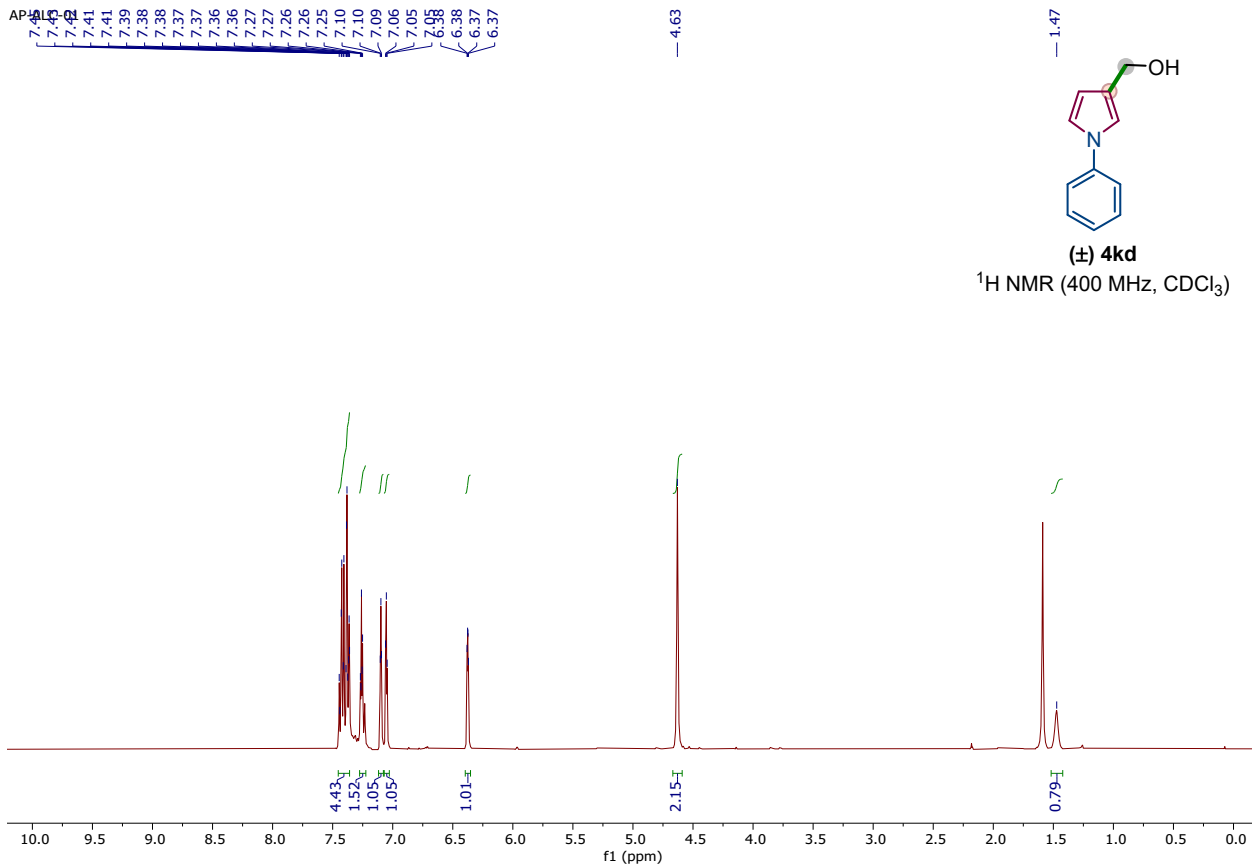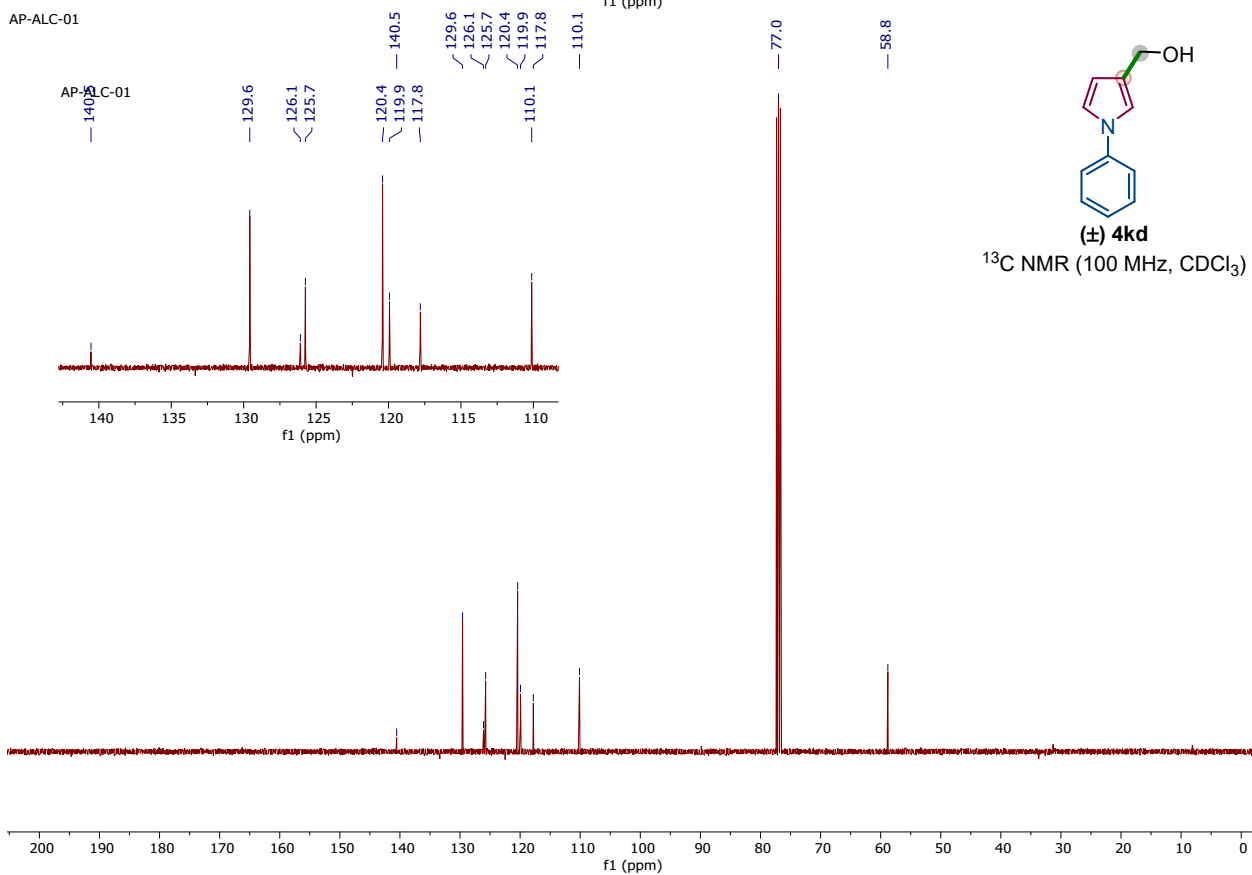

7.46  
7.46  
7.46  
7.45  
7.45  
7.44  
7.44  
7.42  
7.42  
7.41  
7.40  
7.40  
7.40  
7.30  
7.30  
7.28  
7.28  
7.28  
7.28  
7.27  
7.26  
7.26  
7.25  
7.25  
7.25  
7.23  
7.23  
7.23  
7.13  
7.12  
7.12  
7.10  
7.10  
7.09  
6.79  
6.79  
6.78  
6.77  
6.76  
6.76  
6.75  
6.75  
6.74  
6.74  
6.74  
6.73  
6.40  
6.40  
6.40  
6.39  
4.28  
3.91

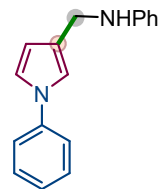

(±) 4kdd

$^{13}\text{C}$  NMR (100 MHz,  $\text{CDCl}_3$ )

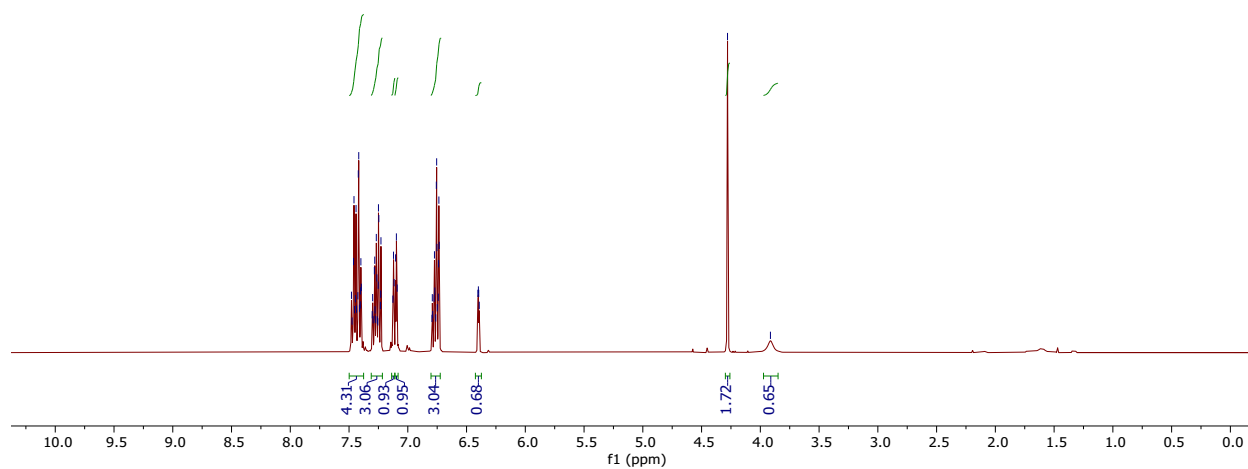

AP-06

AP-08

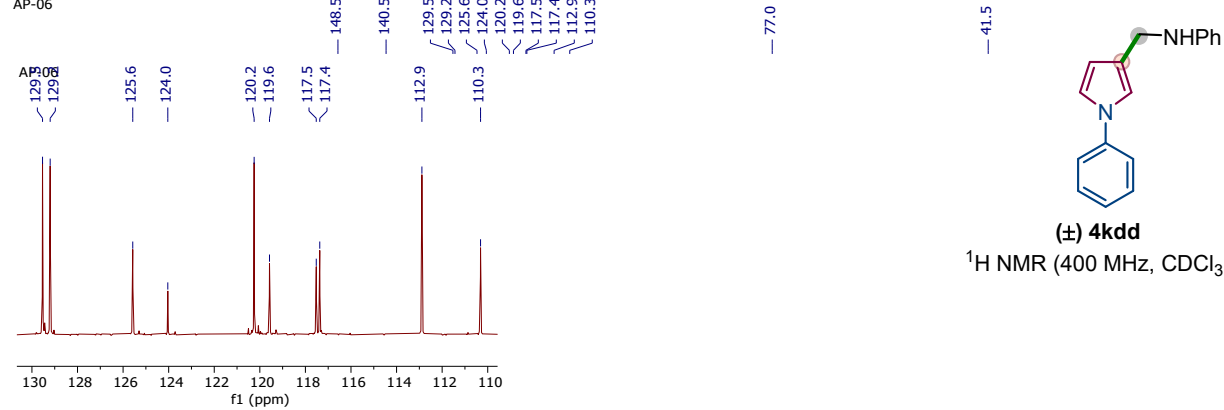

(±) 4kdd

$^1\text{H}$  NMR (400 MHz,  $\text{CDCl}_3$ )

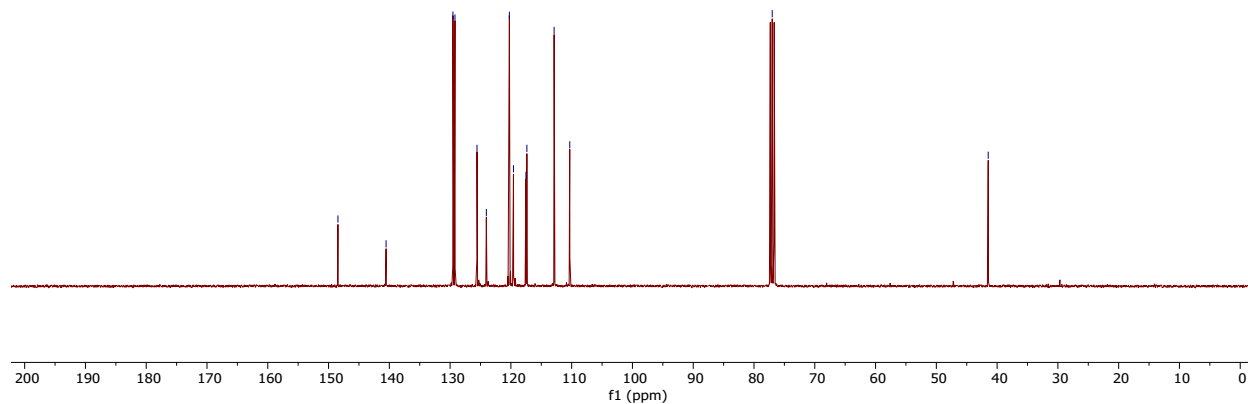

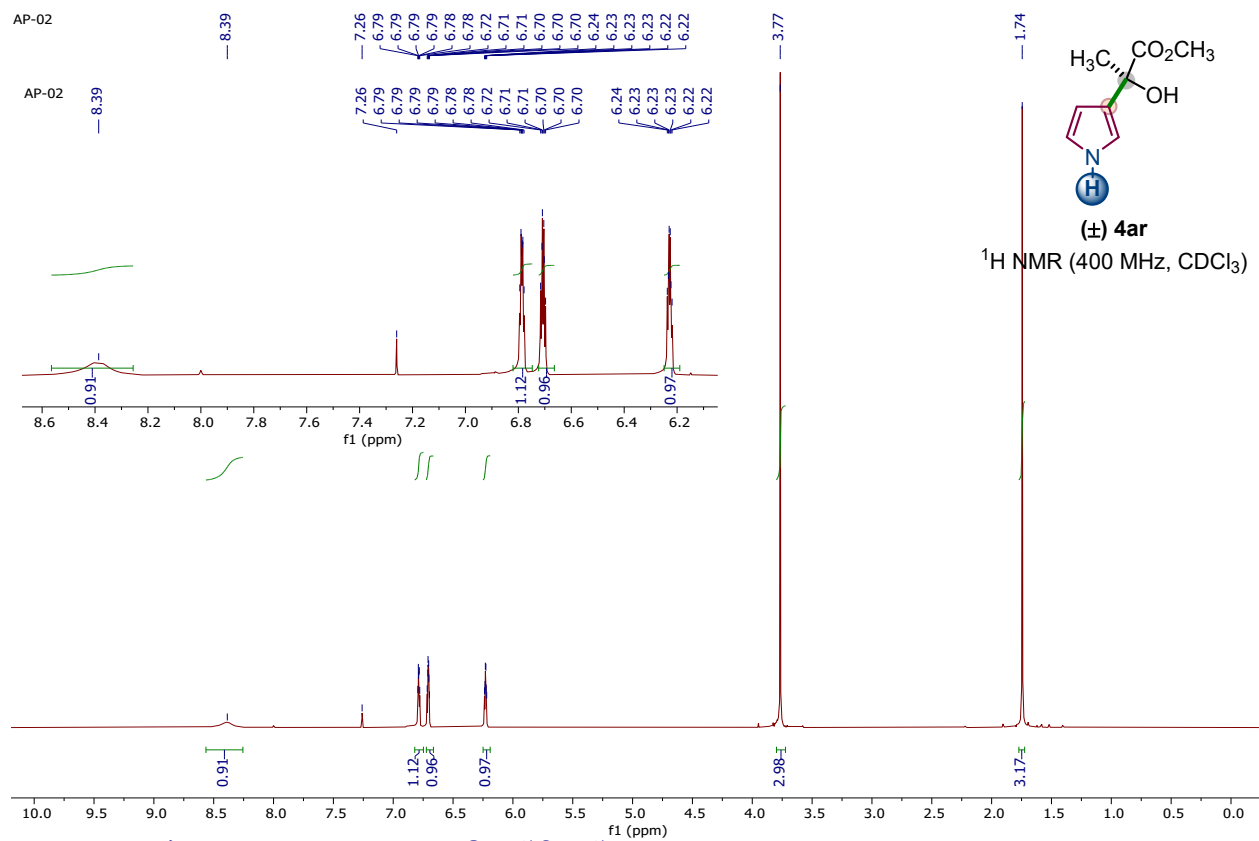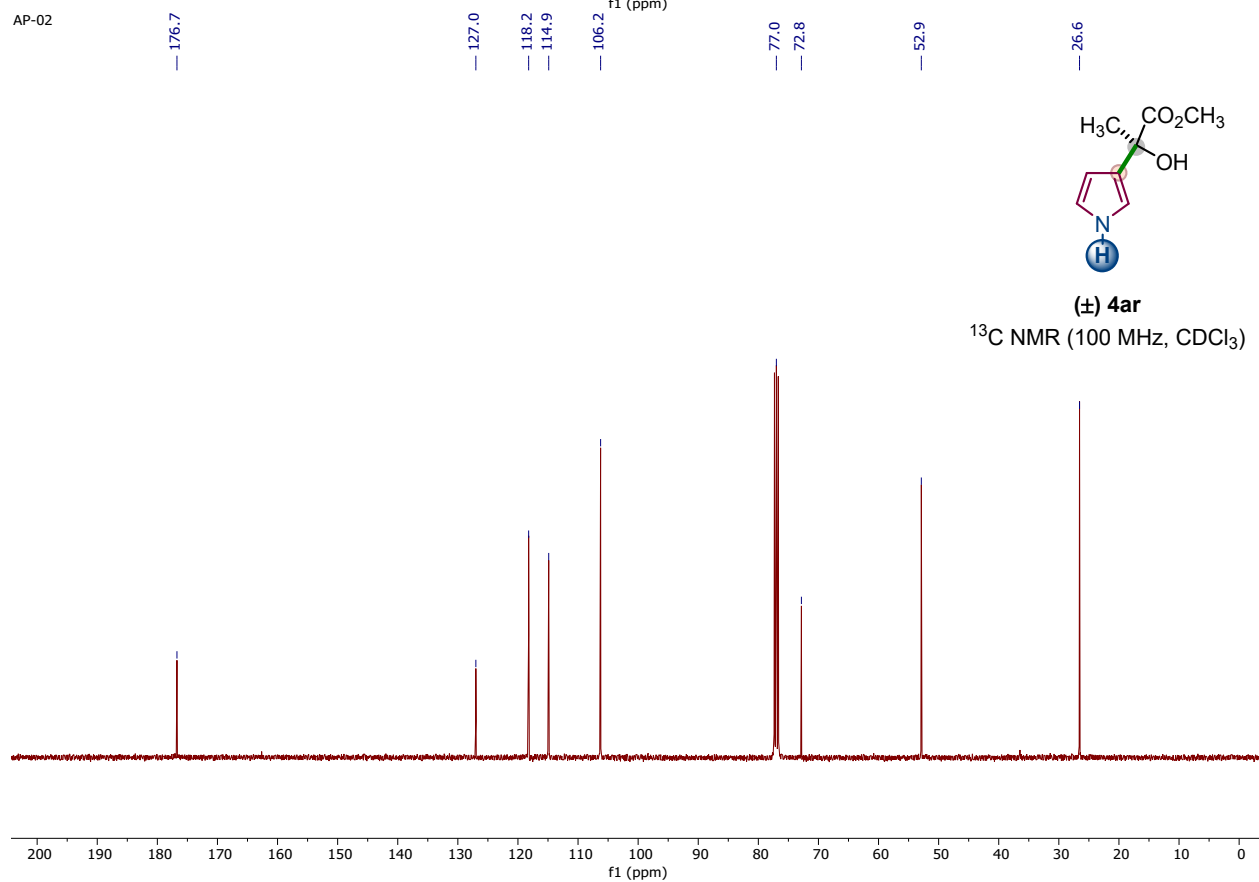

AP-04

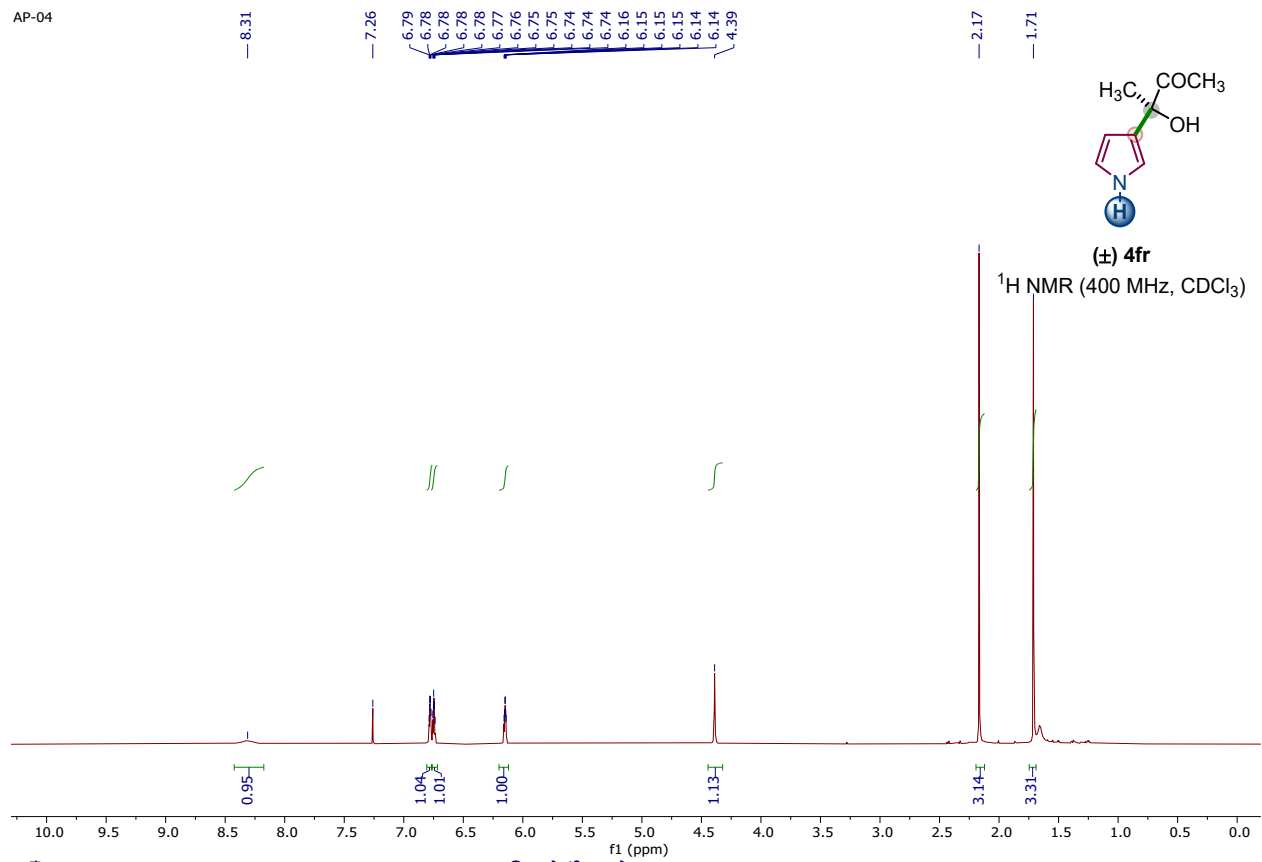

AP-04

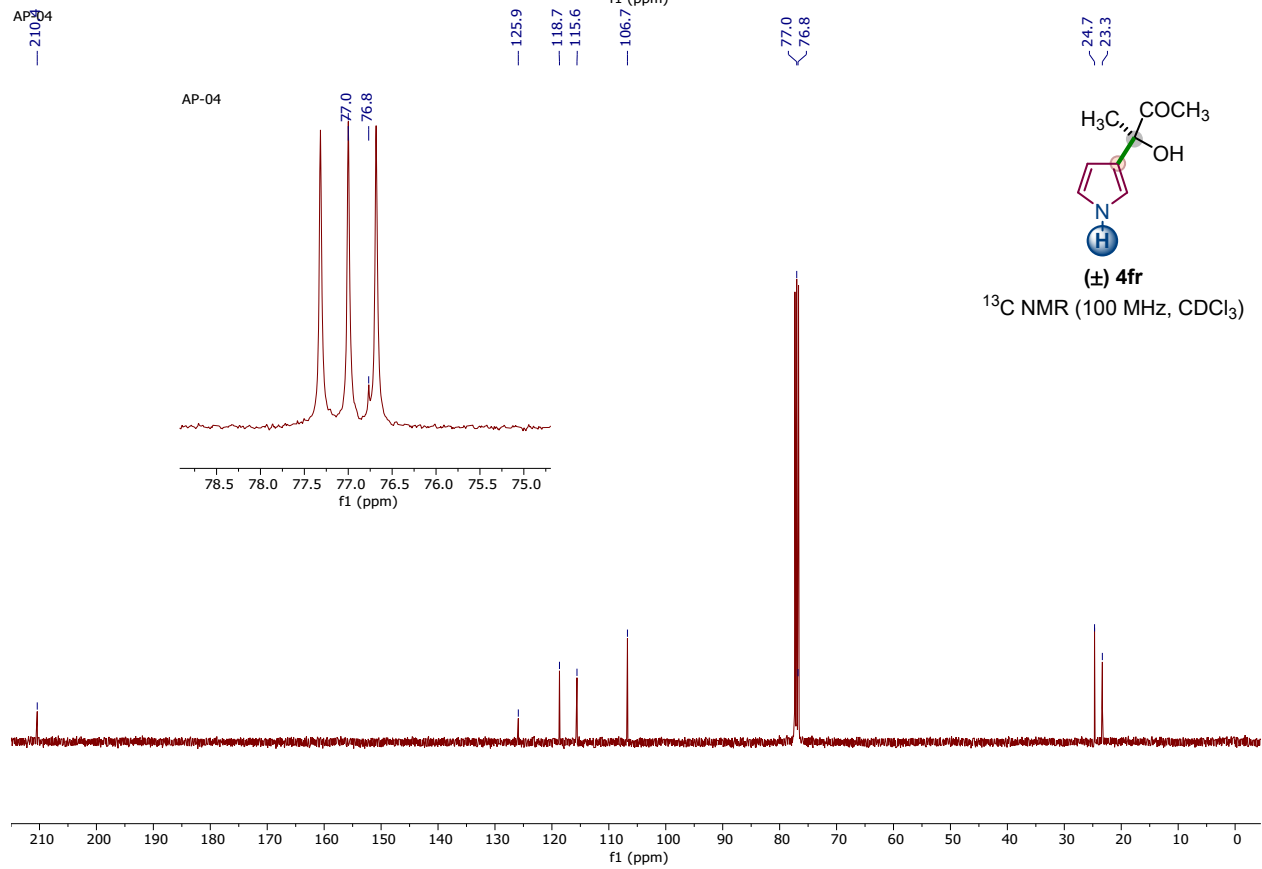







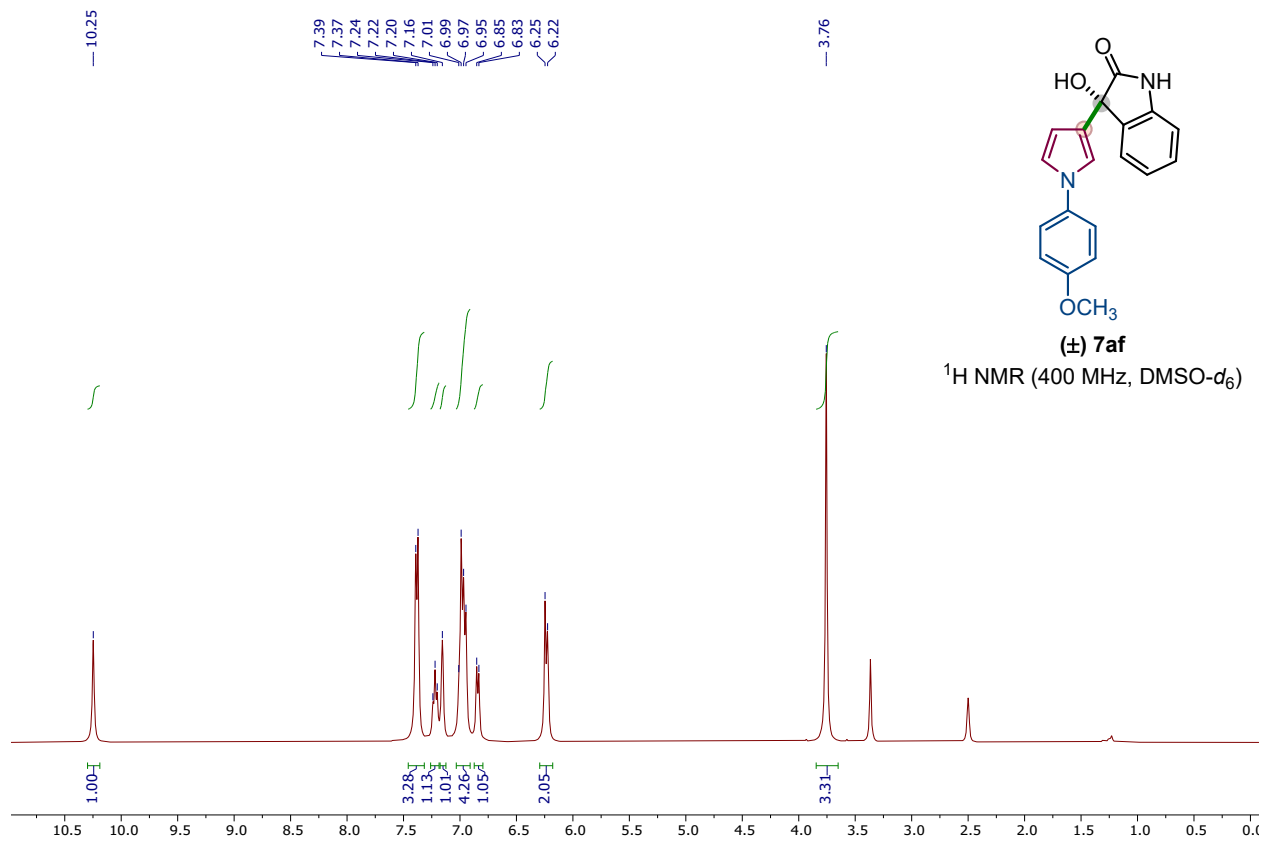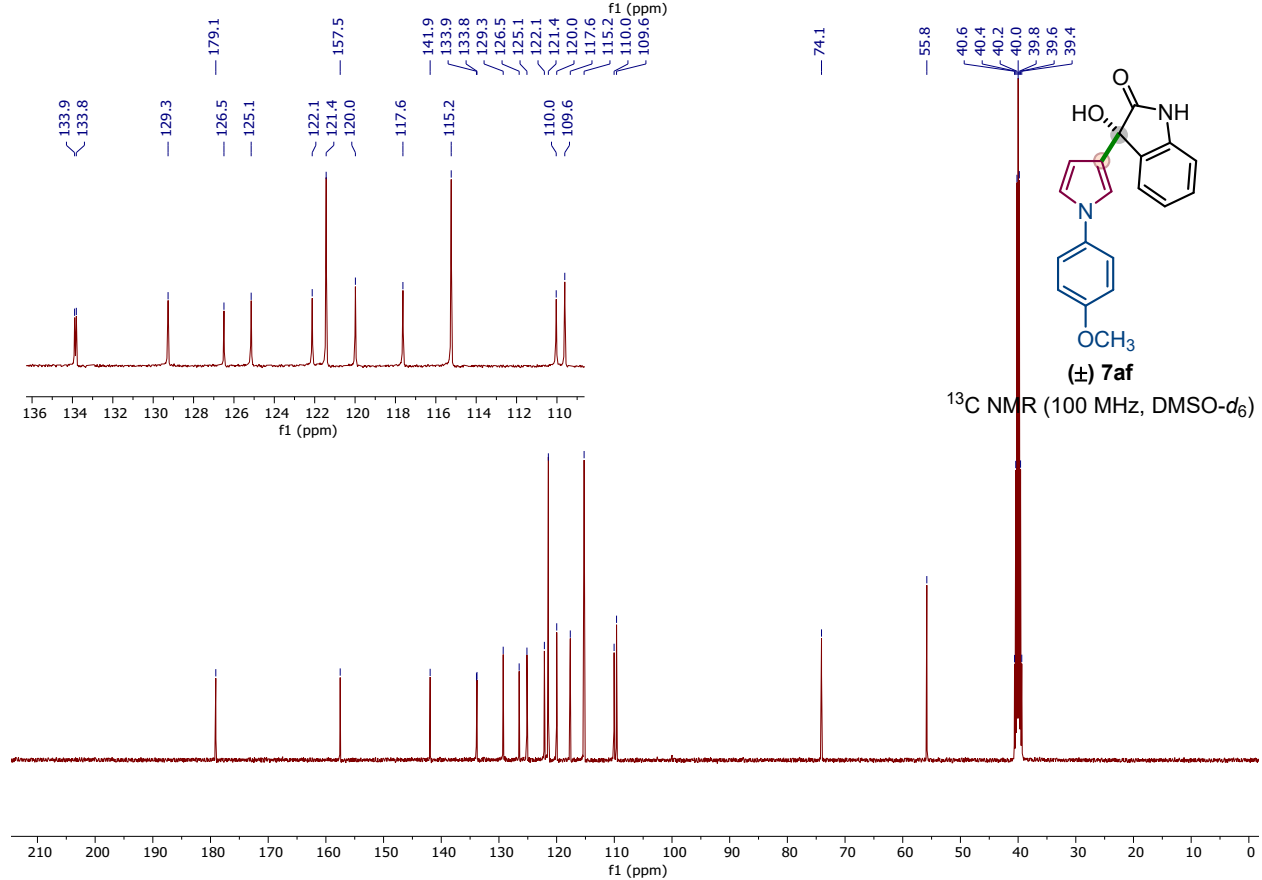

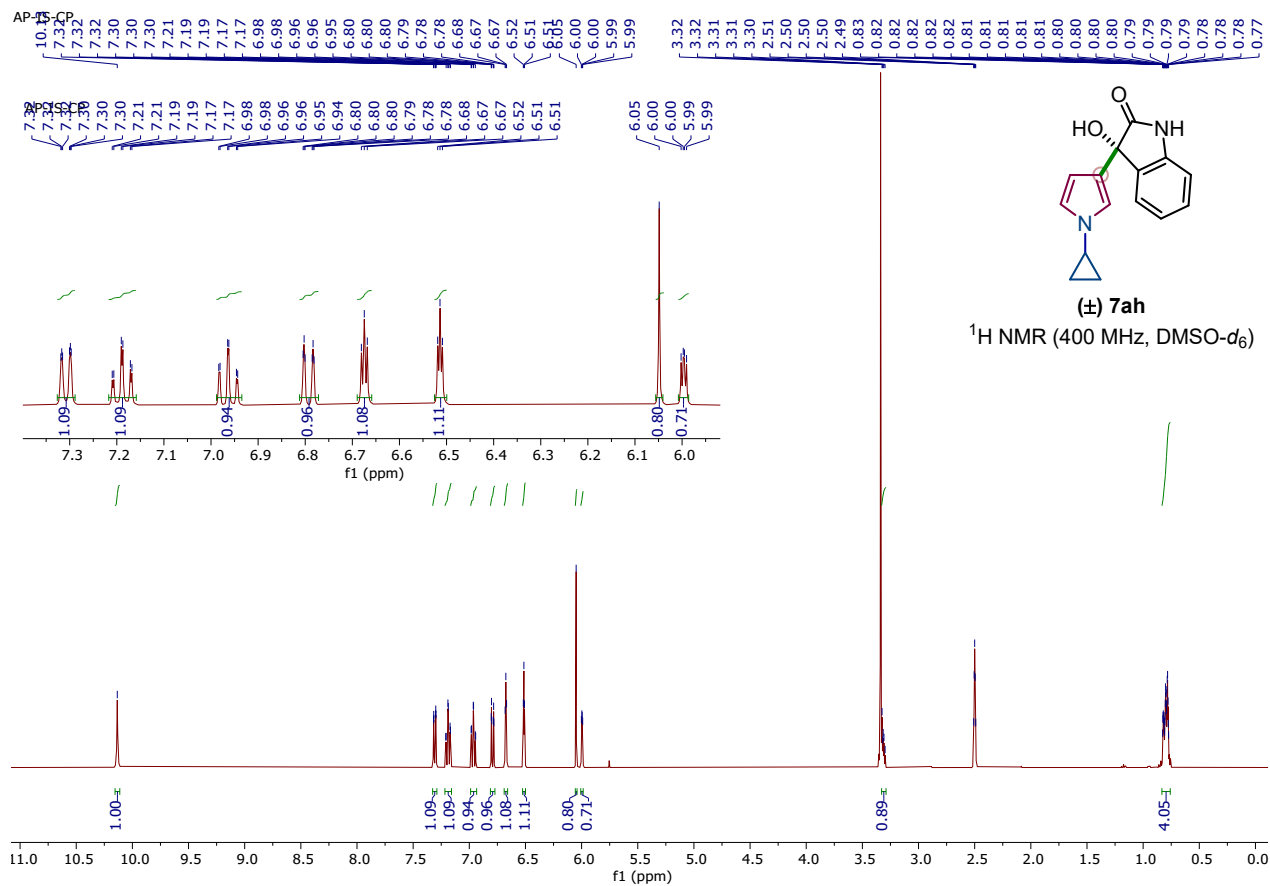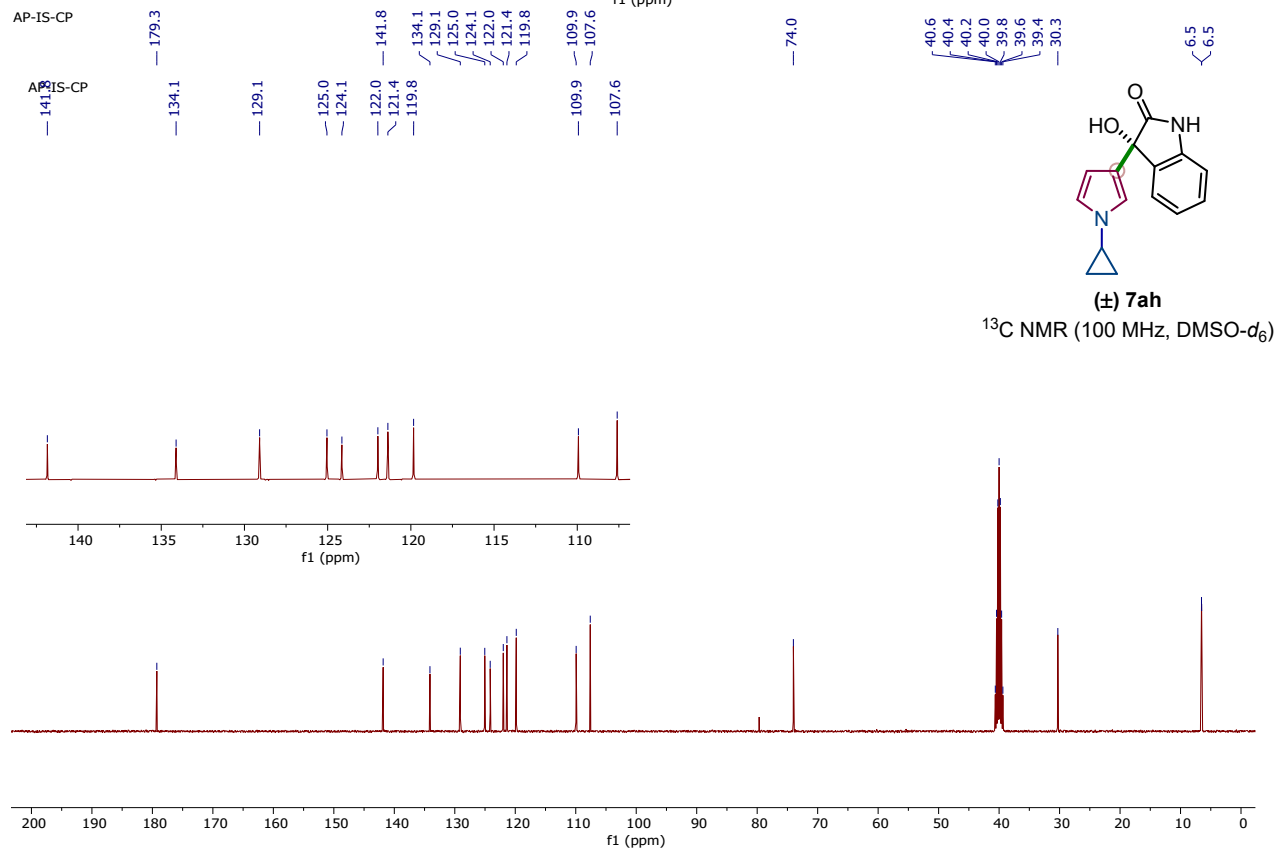

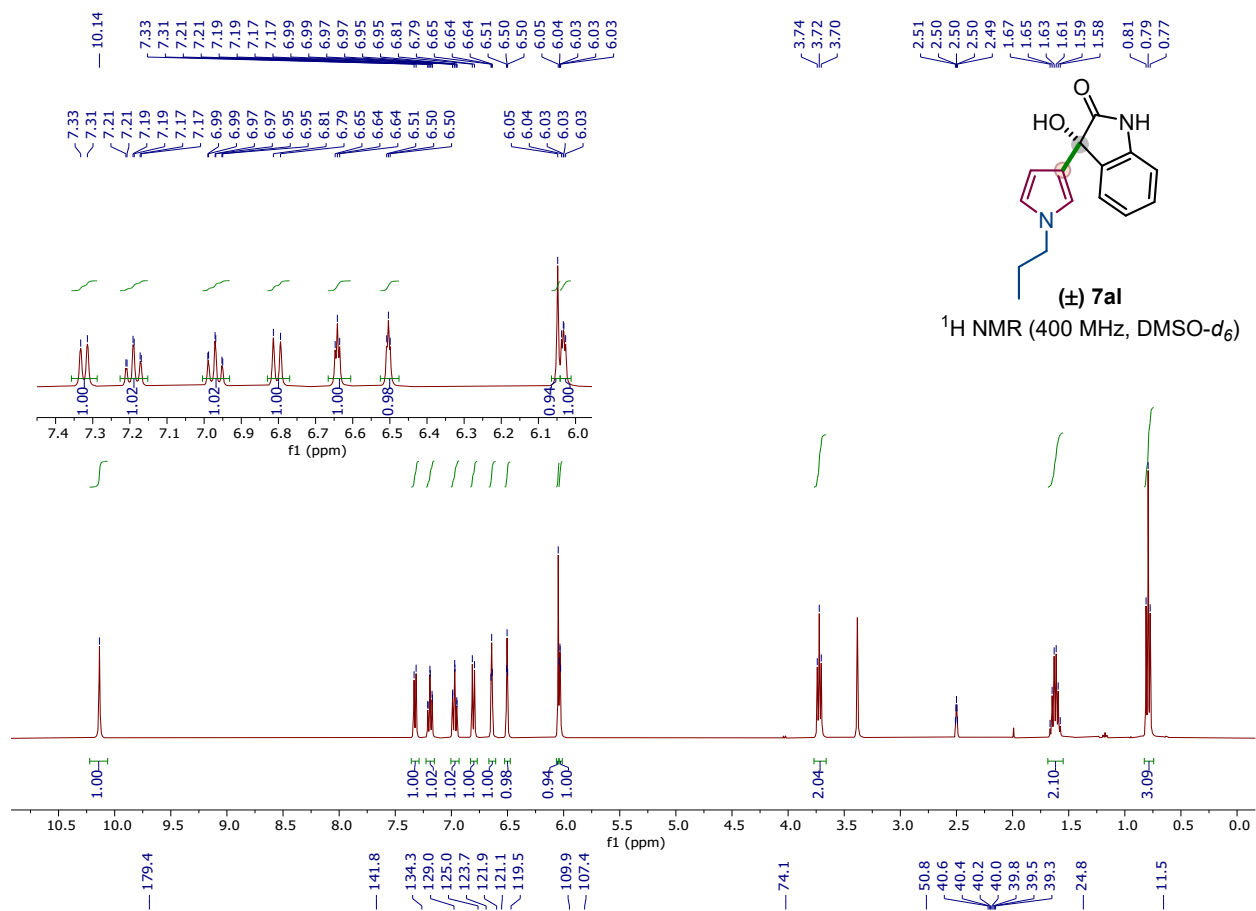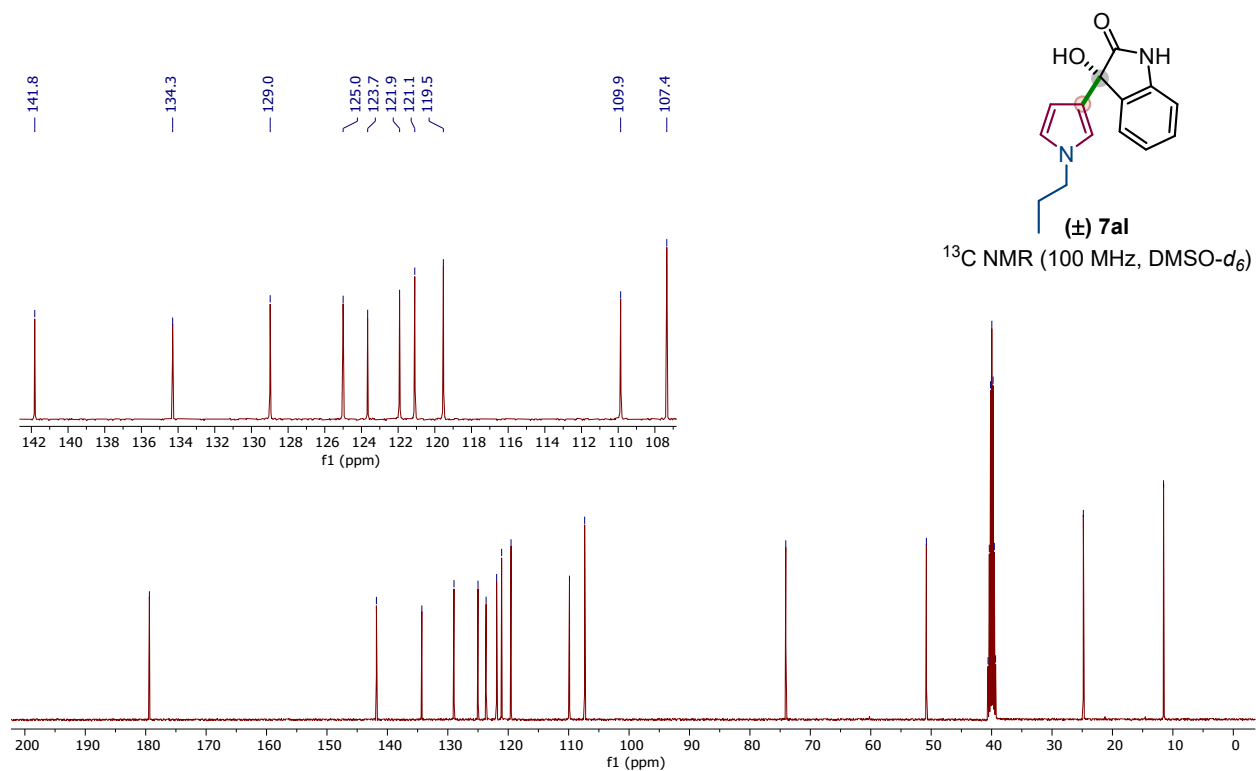



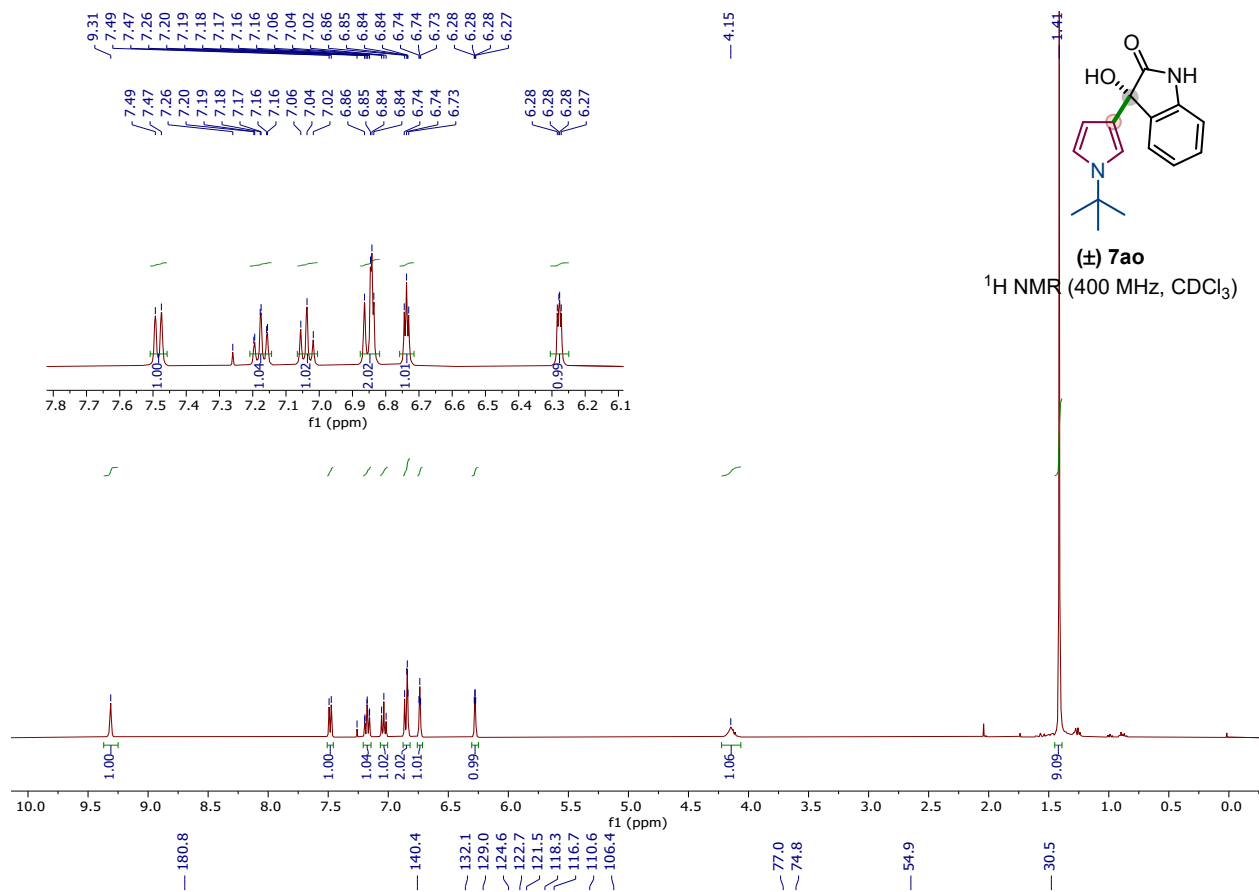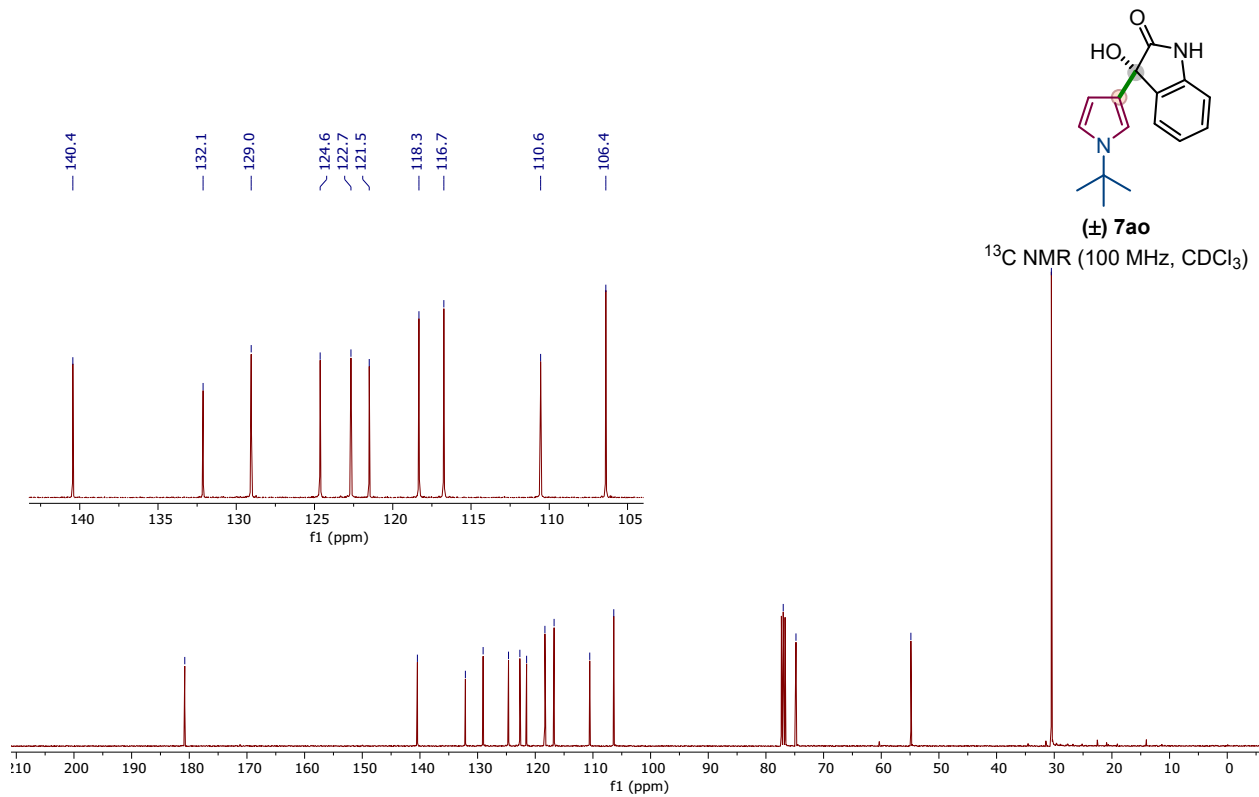



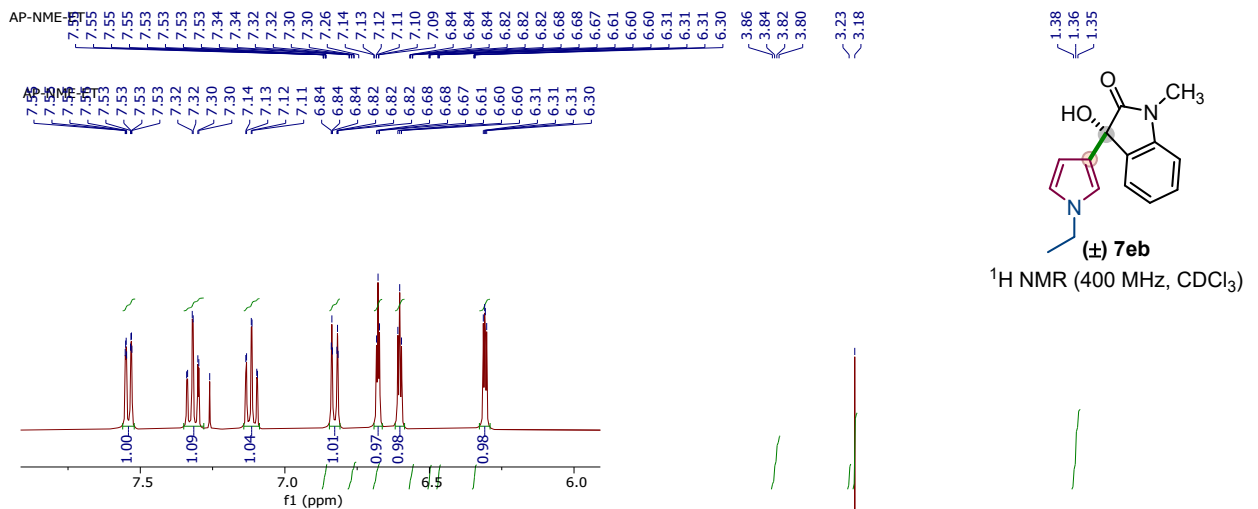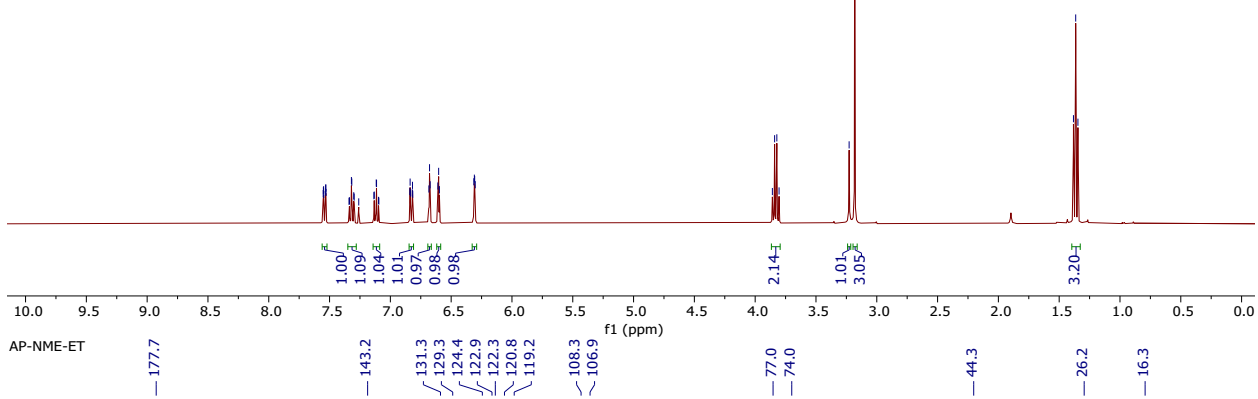

AP-DIK-1

7.75  
7.74  
7.74  
7.38  
7.38  
7.37  
7.37  
7.36  
7.36  
7.36  
7.36  
7.35  
7.35  
7.34  
7.34  
7.34  
7.33  
7.33  
7.32  
7.32  
7.26  
7.18  
7.17  
7.17  
7.17  
7.16  
7.16  
7.16  
7.16  
7.15  
7.15  
7.15  
6.81  
6.81  
6.80  
6.80  
6.67  
6.66  
6.65  
6.65  
5.08  
4.38  
4.36  
4.34  
4.33  
1.40  
1.38  
1.36

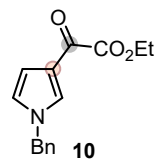

<sup>1</sup>H NMR (400 MHz, CDCl<sub>3</sub>)

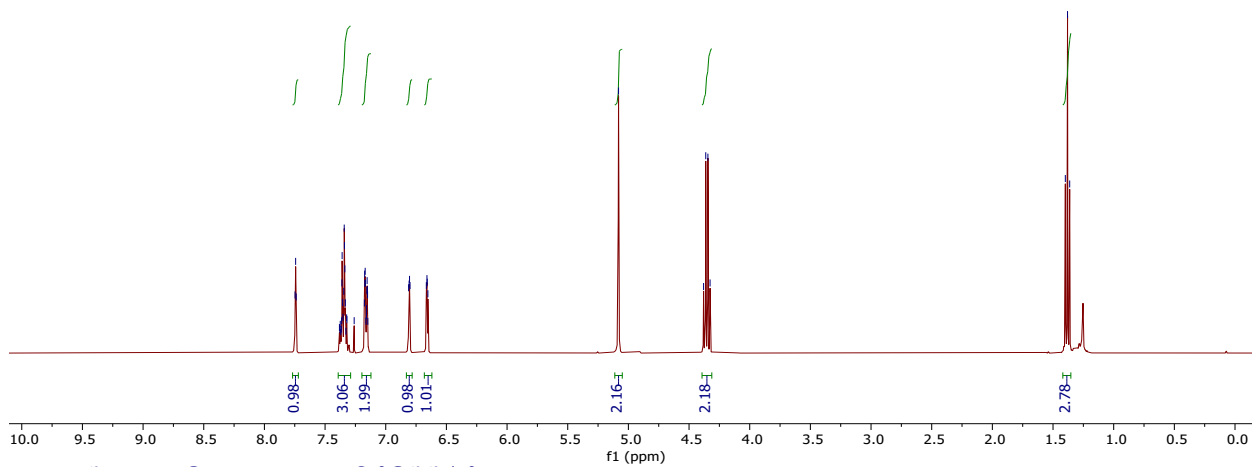

AP-DIK-1

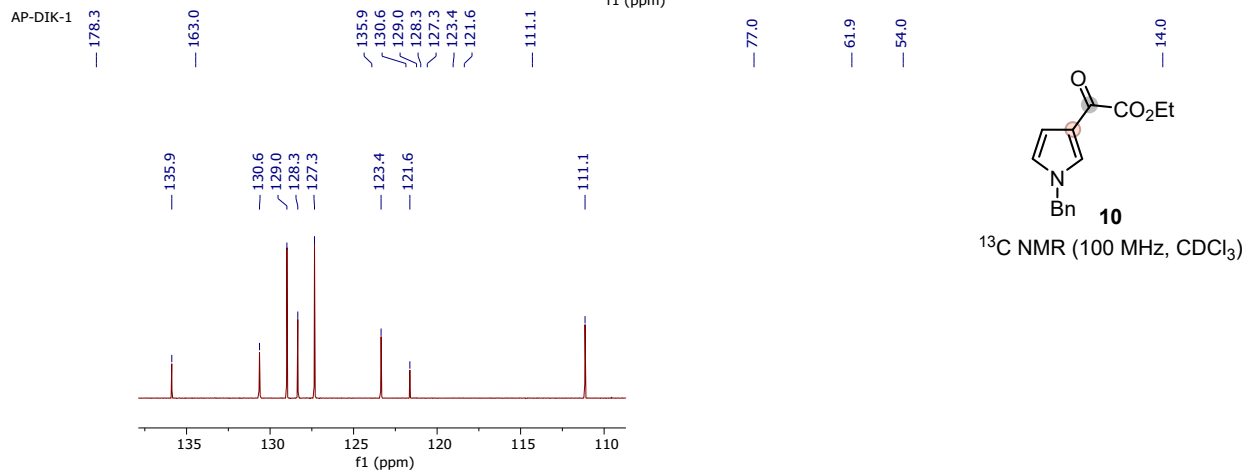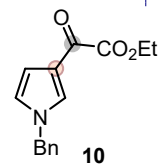

<sup>13</sup>C NMR (100 MHz, CDCl<sub>3</sub>)

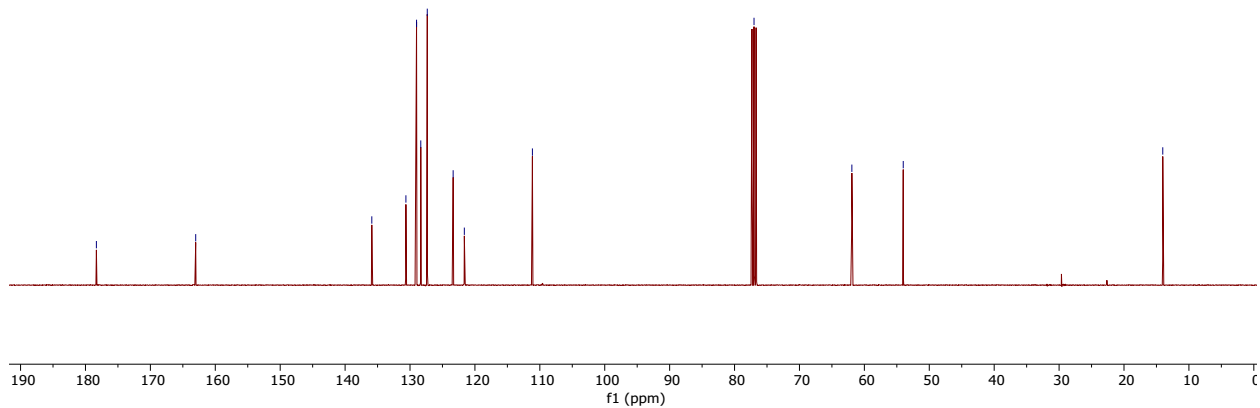



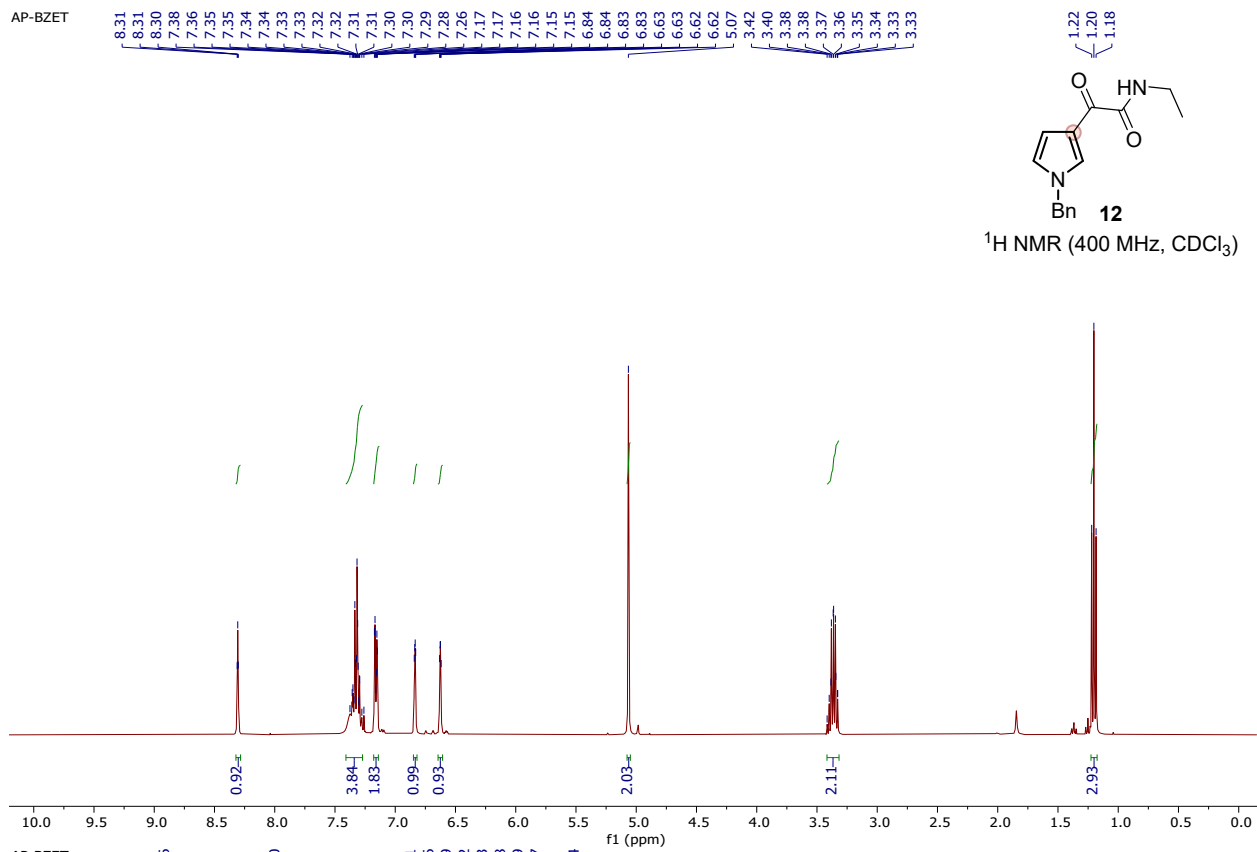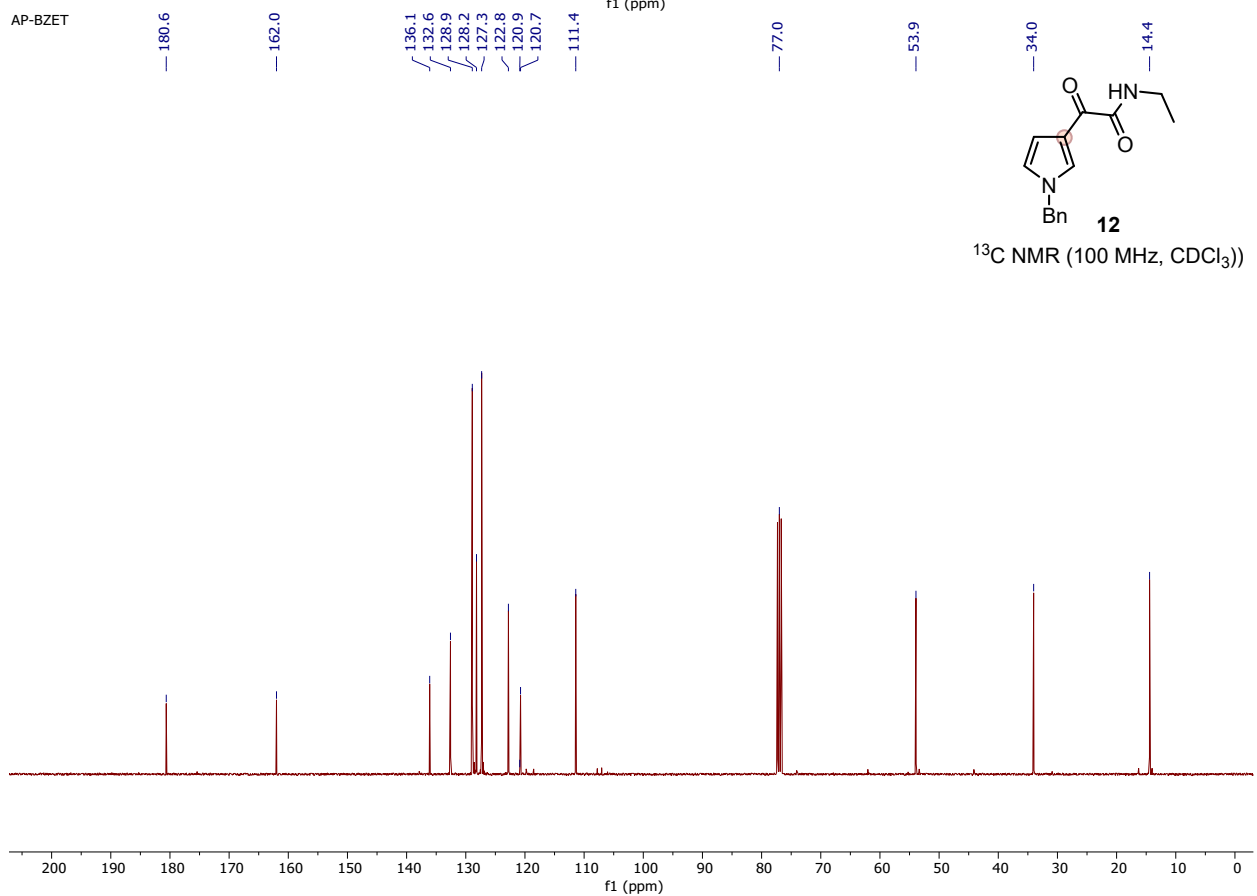

AP-QUI-2

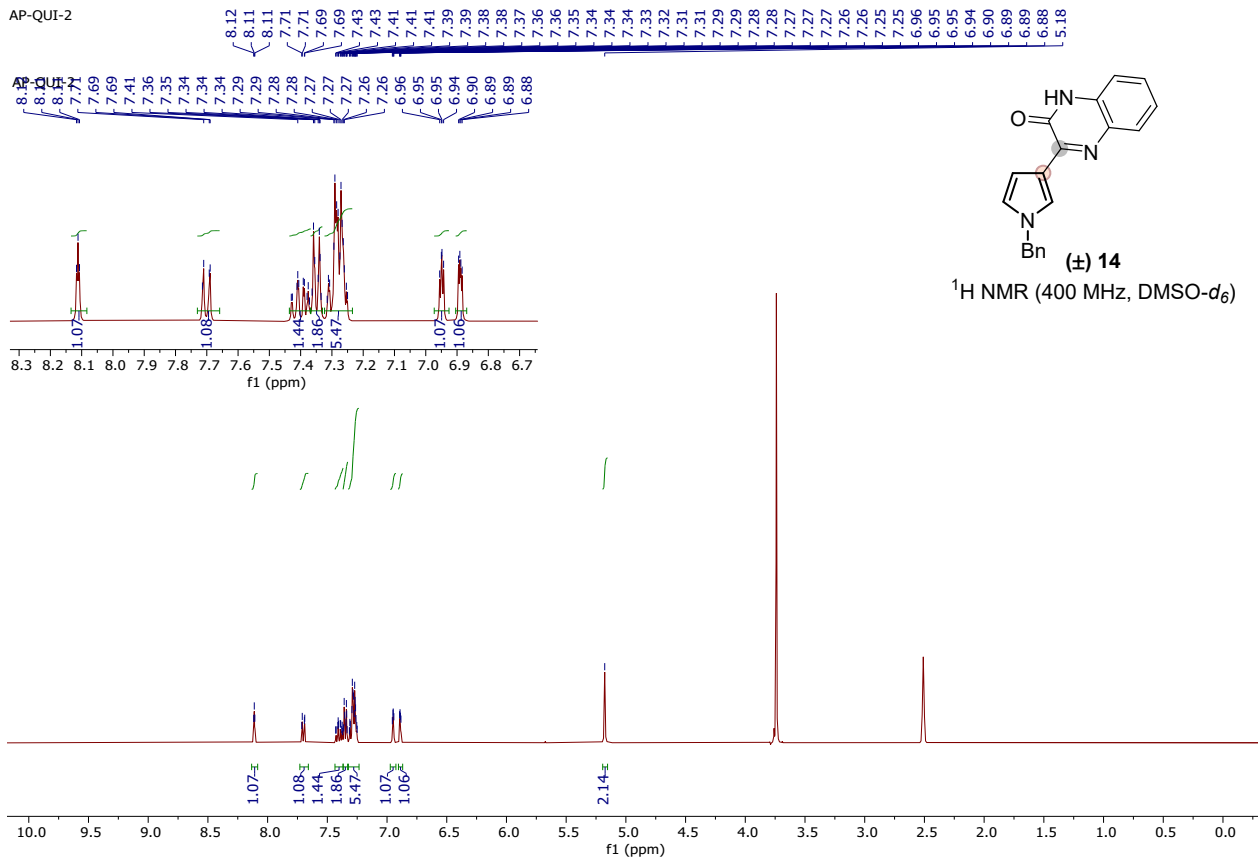

AP-QUI-2

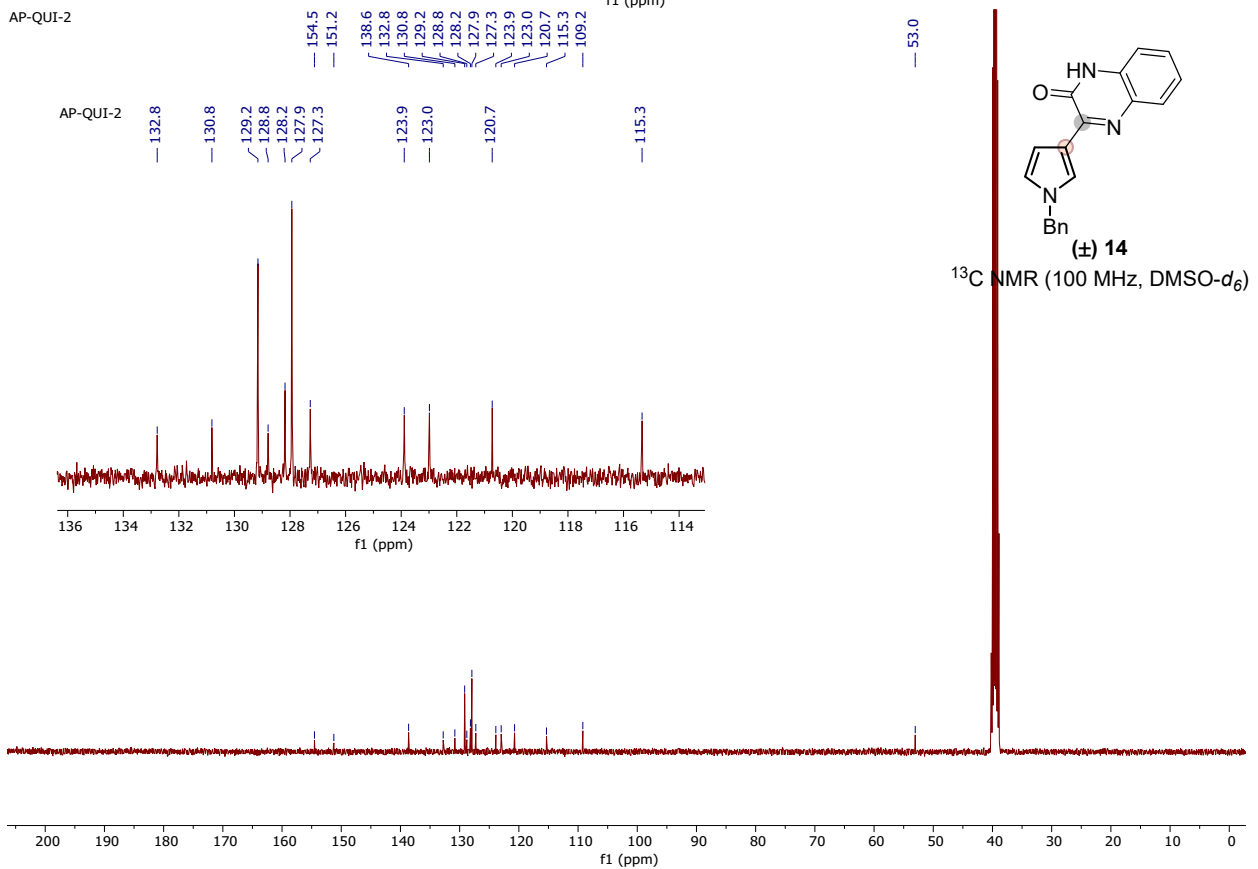

## Single crystal X-ray Diffraction Experiment and Analysis

**Single Crystal XRD Experiments for 7ah:** The single crystal XRD data collection and data reduction were performed using CrysAlis PRO on a single crystal Rigaku Oxford XtaLab Pro Kappa dual home/near diffractometer. The crystals were kept at 93(2) K during data collection using CuK $\alpha$  ( $\lambda = 1.54184 \text{ \AA}$ ) radiation. Using Olex2<sup>[1]</sup>, the structure was solved with the ShelXT<sup>[2]</sup> structure solution program using Intrinsic Phasing and refined with the ShelXL<sup>[3]</sup> refinement package using Least Squares minimisation.

### Single Crystal structure, Cell parameters and structure data of compound (7ah):

The single crystal of compound (7ah) C<sub>15</sub>H<sub>14</sub>N<sub>2</sub>O<sub>2</sub> [exp\_968\_IK-APIS-CP] was crystallized as colorless block through the slow evaporation of (ethyl acetate + hexane + acetone) solvent mixture solution at room temperature. The compound [exp\_968\_IK-APIS-CP] crystallized in monoclinic crystal system with P<sub>2</sub><sub>1</sub>/c space group. One molecule appeared in structure solution in an asymmetric unit ( $Z' = 1$ ) with following crystal unit cell data.

**Crystal Data** for C<sub>15</sub>H<sub>14</sub>N<sub>2</sub>O<sub>2</sub> ( $M = 254.28 \text{ g/mol}$ ): monoclinic, space group P<sub>2</sub><sub>1</sub>/c (no. 14),  $a = 11.1124(2) \text{ \AA}$ ,  $b = 11.30100(10) \text{ \AA}$ ,  $c = 10.6161(2) \text{ \AA}$ ,  $\beta = 109.698(2)^\circ$ ,  $V = 1255.17(4) \text{ \AA}^3$ ,  $Z = 4$ ,  $T = 93(2) \text{ K}$ ,  $\mu(\text{Cu K}\alpha) = 0.737 \text{ mm}^{-1}$ ,  $D_{\text{calc}} = 1.346 \text{ g/cm}^3$ , 13555 reflections measured ( $8.452^\circ \leq 2\theta \leq 159.236^\circ$ ), 2695 unique ( $R_{\text{int}} = 0.0296$ ,  $R_{\text{sigma}} = 0.0230$ ) which were used in all calculations. The final  $R_1$  was 0.0386 ( $I > 2\sigma(I)$ ) and  $wR_2$  was 0.0980 (all data). The crystallographic details of the compound 7ah are deposited to the Cambridge Crystallographic (CCDC 2166129). The ORTEP diagram as crystal structure of 7ah [exp\_968\_IK-APIS-CP] is illustrated in Figure S1. The molecule has one chiral center (C7-R).

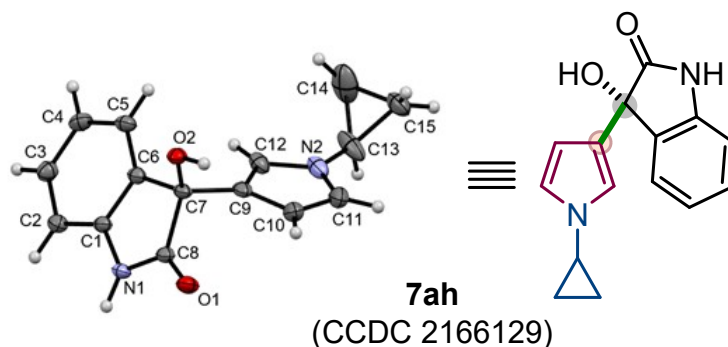

**Figure S1:** The ORTEP diagram of compound 7ah (CCDC 2166129) [exp\_968\_IK-APIS-CP]. (The thermal ellipsoid is drawn at the 50 % probability level.)

The compound crystallized as colorless block in a monoclinic,  $P2_1/c$  space group (CCDC 2166129). One neutral molecule  $C_{15}H_{14}N_2O_2$  found in an asymmetric unit and four molecules are found in a unit cell. The compound has two hydrogen bond donors, N1-H and O2-H, and two hydrogen bond acceptors, O1 and O2. The 3D supramolecular structure is stabilized by hydrogen bond and non-covalent bond interactions.

**Table S1: Crystal data and structure refinement for (7ah) exp\_968\_IK\_APIS-CP\_autored.**

|                                               |                                                               |
|-----------------------------------------------|---------------------------------------------------------------|
| Identification code                           | exp_968_IK_APIS-CP_autored                                    |
| Empirical formula                             | $C_{15}H_{14}N_2O_2$                                          |
| Formula weight                                | 254.28                                                        |
| Temperature/K                                 | 93(2)                                                         |
| Crystal system                                | monoclinic                                                    |
| Space group                                   | $P2_1/c$                                                      |
| $a/\text{\AA}$                                | 11.1124(2)                                                    |
| $b/\text{\AA}$                                | 11.30100(10)                                                  |
| $c/\text{\AA}$                                | 10.6161(2)                                                    |
| $\alpha/^\circ$                               | 90                                                            |
| $\beta/^\circ$                                | 109.698(2)                                                    |
| $\gamma/^\circ$                               | 90                                                            |
| Volume/ $\text{\AA}^3$                        | 1255.17(4)                                                    |
| Z                                             | 4                                                             |
| $\rho_{\text{calc}}/\text{g/cm}^3$            | 1.346                                                         |
| $\mu/\text{mm}^{-1}$                          | 0.737                                                         |
| F(000)                                        | 536.0                                                         |
| Crystal size/ $\text{mm}^3$                   | $0.2 \times 0.15 \times 0.05$                                 |
| Radiation                                     | Cu $K\alpha$ ( $\lambda = 1.54184$ )                          |
| $2\theta$ range for data collection/ $^\circ$ | 8.452 to 159.236                                              |
| Index ranges                                  | $-14 \leq h \leq 13, -13 \leq k \leq 14, -12 \leq l \leq 13$  |
| Reflections collected                         | 13555                                                         |
| Independent reflections                       | 2695 [ $R_{\text{int}} = 0.0296, R_{\text{sigma}} = 0.0230$ ] |
| Data/restraints/parameters                    | 2695/0/173                                                    |
| Goodness-of-fit on $F^2$                      | 1.066                                                         |
| Final R indexes [ $I \geq 2\sigma(I)$ ]       | $R_1 = 0.0386, wR_2 = 0.0964$                                 |
| Final R indexes [all data]                    | $R_1 = 0.0411, wR_2 = 0.0980$                                 |
| Largest diff. peak/hole / $e \text{\AA}^{-3}$ | 0.27/-0.34                                                    |
| CCDC                                          | 2166129                                                       |

**Crystal structure determination of 7ah [exp\_968\_IK\_APIS-CP\_autored]**

**Crystal Data** for compound **7ah**  $C_{15}H_{14}N_2O_2$  ( $M = 254.28$  g/mol): monoclinic, space group  $P2_1/c$  (no. 14),  $a = 11.1124(2) \text{\AA}$ ,  $b = 11.30100(10) \text{\AA}$ ,  $c = 10.6161(2) \text{\AA}$ ,  $\beta = 109.698(2)^\circ$ ,  $V =$

1255.17(4) Å<sup>3</sup>,  $Z = 4$ ,  $T = 93(2)$  K,  $\mu(\text{Cu K}\alpha) = 0.737$  mm<sup>-1</sup>,  $D_{\text{calc}} = 1.346$  g/cm<sup>3</sup>, 13555 reflections measured ( $8.452^\circ \leq 2\Theta \leq 159.236^\circ$ ), 2695 unique ( $R_{\text{int}} = 0.0296$ ,  $R_{\text{sigma}} = 0.0230$ ) which were used in all calculations. The final  $R_1$  was 0.0386 ( $I > 2\sigma(I)$ ) and  $wR_2$  was 0.0980 (all data).

### Refinement model description

Number of restraints - 0, number of constraints - unknown.

#### Details:

1. Fixed Uiso

At 1.2 times of:

All C(H) groups, All C(H,H) groups, All N(H) groups

At 1.5 times of:

All O(H) groups

2.a Ternary CH refined with riding coordinates:

C13(H13)

2.b Secondary CH<sub>2</sub> refined with riding coordinates:

C14(H14A,H14B), C15(H15A,H15B)

2.c Aromatic/amide H refined with riding coordinates:

N1(H1), C2(H2A), C3(H3), C4(H4), C5(H5), C10(H10), C11(H11), C12(H12)

2.d Idealised tetrahedral OH refined as rotating group:

O2(H2)

This report has been created with Olex2, compiled on 2020.11.12 svn.r5f609507 for OlexSys. Please [let us know](#) if there are any errors or if you would like to have additional features.

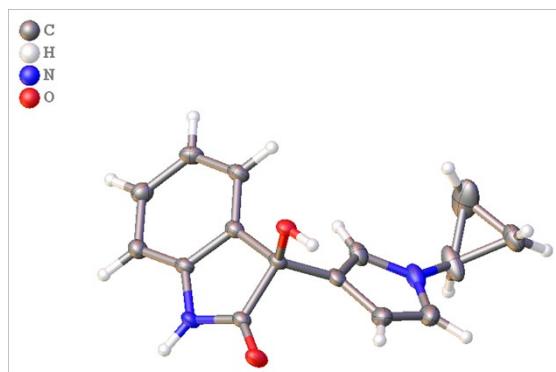

### References:

1. Dolomanov, O.V., Bourhis, L.J., Gildea, R.J, Howard, J.A.K. & Puschmann, H. (2009), J. Appl. Cryst. 42, 339-341.
2. Sheldrick, G.M. (2015). Acta Cryst. A71, 3-8.
3. Sheldrick, G.M. (2015). Acta Cryst. C71, 3-8.

## **Supporting information for the Theoretical Calculation at the DFT-Level**

All the calculations were performed using B3LYP functional<sup>1</sup> with def2-TZVP basis set<sup>2</sup> with RIJCOSX approximation. A correction for dispersion interaction is added using Grimme D3 with Becke-Johnson damping.<sup>3</sup> All the calculations, including geometry optimization and frequencies, were performed using ORCA 4.2 program in the gas phase, with RIJCOSX approximation for Coulomb and exchange integrals.<sup>4</sup>

From the transition states, the paths to the reactants and products were traced back using intrinsic reaction coordinates (IRC) calculations.

### ***References:***

- [1] K. Kim, K. D. Jordan, *J. Phys. Chem.* **1994**, *98*, 10089–10094.
- [2] F. Weigend, R. Ahlrichs, *Phys. Chem. Chem. Phys.* **2005**, *7*, 3297–3305.
- [3] B. R. Brooks, C. L. Brooks III,; A. D. Mackerell Jr, L. Nilsson, R. J. Petrella, B. Roux, Y. Won, G. Archontis, C. Bartels, S. Boresch, A. Caflisch, L. Caves, Q. Cui, A. R. Dinner, M. Feig, S. Fischer, J. Gao, M. Hodoseck, W. Im, K. Kuczera, T. Lazaridis, J. Ma, V. Ovchinnikov, E. Paci, R. W. Pastor, C. B. Post, J. Z. Pu, M. Schaefer, B. Tidor, R. M. Venable, H. L. Woodcock, X. Wu, W. Yang, D. M. York, M. Karplus, *B. J. Comput. Chem.* **2009**, *30*, 1545–1614.
- [4] a) F. Neese, *Wiley Interdiscip. Rev. Comput. Mol. Sci.* **2012**, *2*, 73–78; b) F. Neese, *Wiley Interdiscip. Rev. Comput. Mol. Sci.* **2018**, *8*, 1–6.

**Table S5:** The optimized structures of the molecules.

| Pyrrole <b>5b</b>                                                                                          | Enamine <b>A</b>                                                                                            |
|------------------------------------------------------------------------------------------------------------|-------------------------------------------------------------------------------------------------------------|
| 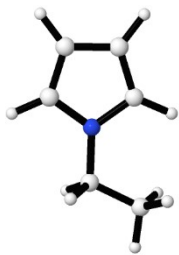<br><small>Jmol</small>   | <br><small>Jmol</small>  |
| Carbonyl <b>3b</b>                                                                                         |                                                                                                             |
| <br><small>Jmol</small>   |                                                                                                             |
| TS-1 C-3 substituted pyrrole                                                                               | TS-2 C-2 substituted pyrrole                                                                                |
| <br><small>Jmol</small> | <br><small>Jmol</small> |
| Compound <b>4bb</b> C-3 substituted Pyrrole                                                                | Compound <b>8</b> C-2 substituted Pyrrole                                                                   |
| <br><small>Jmol</small> | <br><small>Jmol</small> |

**Figure S6:** The pictures of the frontier orbitals are given below

|                                                                                    |                                                                                    |                                                                                      |
|------------------------------------------------------------------------------------|------------------------------------------------------------------------------------|--------------------------------------------------------------------------------------|
| 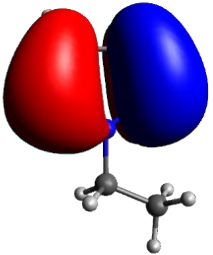  |   |   |
| <p>a) OMO of preformed Pyrrole <b>5b</b> (-5.6 eV)</p>                             | <p>b) OMO of in situ enamine-A (-5.37 eV)</p>                                      | <p>c) HOMO of carbonyl <b>3b</b> (-7.1 eV)</p>                                       |
|  |  |  |
| <p>e) LUMO of preformed pyrrole <b>5b</b> (-0.73 eV)</p>                           | <p>f) LUMO of in situ enamine-A (-0.68eV)</p>                                      | <p>g) LUMO Isatin <b>3b</b> (-2.04 eV)</p>                                           |



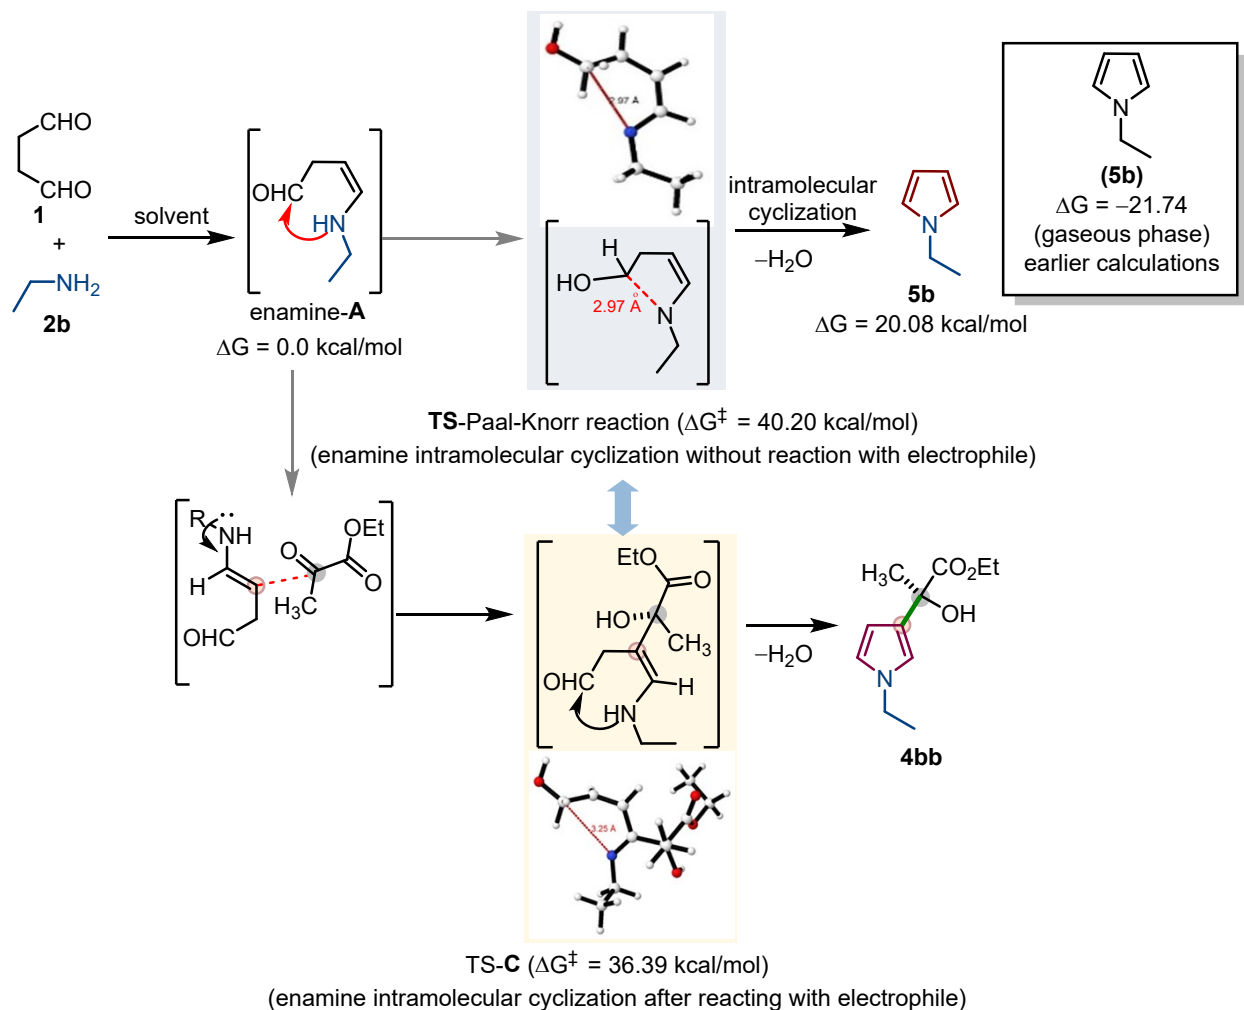

**Figure S7:** Separate DFT-Calculations were performed for the comparison between the TS-Paal-Knorr reaction (cyclization without reaction with reactive carbonyls) and TS-C (cyclization after reaction with reactive carbonyls) in EtOH as suggested to show the comparison between cyclization steps.

## XYZ coordinates, energies, and frequencies

Note: All thermochemistry calculations are done at 298.15K and 1.00 atm

### Pyrrole 5b

#### GIBBS FREE ENERGY

The Gibbs free energy is  $G = H - T*S$

Total enthalpy ... -288.59189803 Eh  
Total entropy correction ... -0.03630735 Eh -22.78 kcal/mol

Final Gibbs free energy ... -288.62820538 Eh

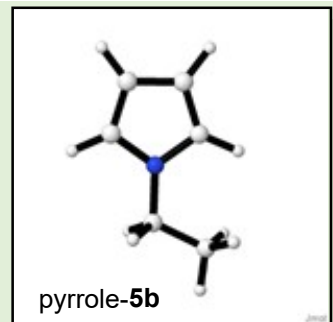

|   |                   |                   |                   |
|---|-------------------|-------------------|-------------------|
| C | -6.44938131080991 | 2.08976375490413  | -0.01401379259410 |
| C | -5.03658755337243 | 1.96247900504482  | -0.00380859766865 |
| C | -6.97114542771052 | 0.81788632815014  | -0.00771567667738 |
| C | -4.74710255785369 | 0.61710952257081  | 0.00853714105486  |
| N | -5.93124096553293 | -0.07871852436392 | 0.00518789622844  |
| C | -6.11327785552268 | -1.52654186552911 | 0.03871334324288  |
| C | -4.81387030159236 | -2.31225011171962 | -0.00960083767943 |
| H | -7.01738226019185 | 3.00505330178139  | -0.02645574955572 |
| H | -4.31291392676473 | 2.76043881406363  | -0.00738647226326 |
| H | -7.99228655986177 | 0.47406684115632  | -0.01086517734016 |
| H | -3.79881939663624 | 0.11199208339819  | 0.01716208424690  |
| H | -6.74347630116981 | -1.81041649391319 | -0.80811026605862 |
| H | -6.66283452699028 | -1.78535292487801 | 0.94798407469695  |
| H | -4.25510665815108 | -2.10822510027289 | -0.92358984536166 |
| H | -5.04524225683625 | -3.37807597501285 | 0.01574230353045  |
| H | -4.17527214100341 | -2.08805865537984 | 0.84517957219850  |

### Enamine A

#### GIBBS FREE ENERGY

The Gibbs free energy is  $G = H - T*S$

Total enthalpy ... -364.97203725 Eh  
Total entropy correction ... -0.04526842 Eh -28.41 kcal/mol

Final Gibbs free energy ... -365.01730566 Eh

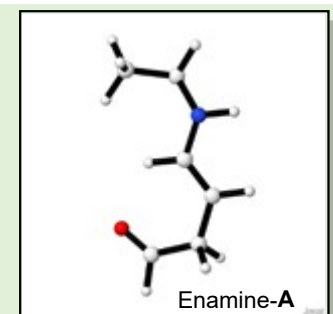

|   |                   |                  |                   |
|---|-------------------|------------------|-------------------|
| C | -7.68869262374191 | 3.39050976181050 | 0.27470219910227  |
| C | -6.32321000444829 | 3.86274477398972 | -0.21124366643282 |
| N | -5.20682821832376 | 3.14462970455977 | 0.40177328696638  |

|   |                   |                   |                   |
|---|-------------------|-------------------|-------------------|
| C | -5.01408547205674 | 1.80220312260684  | 0.13531192468407  |
| H | -5.91978851475246 | 1.22944146845852  | -0.00008779985664 |
| C | -3.82072909589716 | 1.19641051979073  | 0.08605972054396  |
| C | -3.55593525667982 | -0.26980941542049 | -0.04241438338372 |
| C | -4.66617924681410 | -1.22971897539466 | -0.36211280686736 |
| O | -5.82003333970990 | -0.96580511946825 | -0.58565926221135 |
| H | -4.32446077698447 | -2.28891298821473 | -0.38265872512038 |
| H | -8.47364204713658 | 3.96972009080371  | -0.21491719527599 |
| H | -7.78388998913074 | 3.52574749829683  | 1.35389912266869  |
| H | -7.86309574233248 | 2.33974528835842  | 0.03729082897747  |
| H | -6.20019412248842 | 4.91346576365122  | 0.05864422639940  |
| H | -6.28168665696585 | 3.80192514454775  | -1.30821834411296 |
| H | -4.35131441150701 | 3.68073393061466  | 0.41650885970703  |
| H | -2.92724046920435 | 1.80447020744928  | 0.21074655560858  |
| H | -3.08868455647035 | -0.67354538085738 | 0.87126831657672  |
| H | -2.79195945535545 | -0.46348539558252 | -0.81146285797338 |

### Carbonyl 3b

#### GIBBS FREE ENERGY

The Gibbs free energy is  $G = H - T \cdot S$

Total enthalpy ... **-420.85187437 Eh**

Total entropy correction ... **-0.04463288 Eh**    **-28.01 kcal/mol**

Final Gibbs free energy ... **-420.89650725 Eh**

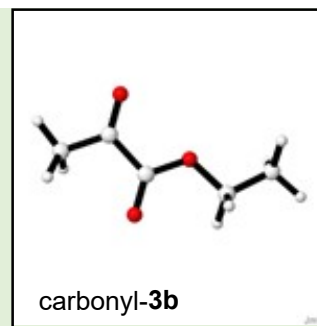

|   |                   |                  |                   |
|---|-------------------|------------------|-------------------|
| C | -8.32240629167295 | 2.66786043948642 | -0.25712174566105 |
| C | -7.03592832017822 | 3.43847867702001 | -0.18447028853187 |
| C | -5.81292225439737 | 2.61691927915379 | 0.28825919121762  |
| O | -5.93285970738520 | 1.59325438501548 | 0.91628604576484  |
| O | -4.66299349467938 | 3.18077374488621 | -0.06215591645271 |
| C | -3.46042109355526 | 2.50958734230496 | 0.39092595374772  |
| C | -2.26944881705589 | 3.19028200878813 | -0.23786447022732 |
| O | -6.92915266034633 | 4.61012445170145 | -0.43539150595262 |
| H | -8.23109356157753 | 1.87192152638982 | -1.00092907392663 |
| H | -9.13299373315147 | 3.34061776036995 | -0.52569496238843 |
| H | -8.51988030549289 | 2.17282169301353 | 0.69509467101600  |
| H | -3.52677693034968 | 1.45820282350464 | 0.10805413954693  |
| H | -3.43552111357089 | 2.57044527164312 | 1.48044415351876  |
| H | -2.29791643815795 | 3.10564493100973 | -1.32503279240618 |
| H | -1.35420334564422 | 2.71374822507872 | 0.11895172803509  |
| H | -2.23424193278467 | 4.24618744063401 | 0.03419487269986  |

## Compound 4bb

### GIBBS FREE ENERGY

The Gibbs free energy is  $G = H - T \cdot S$

Total enthalpy ... -709.45985728 Eh

Total entropy correction ... -0.05587660 Eh -35.06 kcal/mol

Final Gibbs free energy ... -709.51573388 Eh

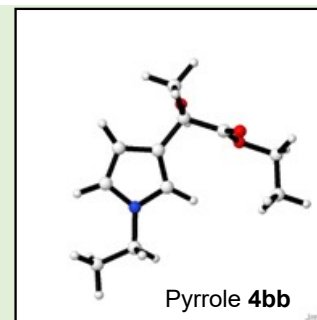

|   |                   |                   |                   |
|---|-------------------|-------------------|-------------------|
| C | -5.11568043446146 | 1.92168647445038  | -0.13120799394969 |
| C | -3.81898204775734 | 1.33681275282077  | -0.05196959423962 |
| C | -6.03192278867211 | 0.89986591207020  | -0.10390444899715 |
| C | -4.00537326099624 | -0.02749389769475 | 0.00594469128230  |
| N | -5.35066300376423 | -0.29136504077146 | -0.02584163781691 |
| C | -5.91631566993722 | -1.61884943700305 | 0.18647557280803  |
| C | -7.36679070411274 | -1.73402214966304 | -0.25107474129669 |
| C | -2.51058611695563 | 2.08973505196779  | -0.05441815227467 |
| C | -2.55766122685516 | 3.29202556296156  | 0.88303332157728  |
| O | -2.22119240871215 | 2.6212224427501   | -1.34934435662375 |
| C | -1.38476752866017 | 1.14264470160543  | 0.40571731130998  |
| O | -1.07126219642694 | 0.95447036443186  | 1.55267400491546  |
| O | -0.80084226446174 | 0.52395394788091  | -0.64012329872922 |
| C | 0.26671530488554  | -0.40125961447288 | -0.33640240946824 |
| C | -0.27107487802917 | -1.78618917157468 | -0.03522664131450 |
| H | -5.34940057786922 | 2.96913526230777  | -0.21981623981882 |
| H | -7.10526874003048 | 0.93465952860547  | -0.14971240221009 |
| H | -5.82756474842560 | -1.88178104379320 | 1.24540658478315  |
| H | -5.30177123369848 | -2.32705082179919 | -0.37293386276181 |
| H | -8.01398542066188 | -1.07487118428488 | 0.32742641432565  |
| H | -7.71044643706775 | -2.75587745208218 | -0.08520698946906 |
| H | -7.48674393123044 | -1.49177403511622 | -1.30835534955918 |
| H | -3.33131887156918 | 3.97750265922429  | 0.54204611708747  |
| H | -1.60058072896731 | 3.81318232789975  | 0.86862573783789  |
| H | -2.77852692004687 | 2.96981496625229  | 1.89784593476094  |
| H | -2.17109638243723 | 1.88313318596179  | -1.96753991456097 |
| H | 0.83854482531419  | -0.00879137069359 | 0.50300659369879  |
| H | 0.88908575902393  | -0.39874247108156 | -1.22983703682720 |
| H | -0.89914421112053 | -1.77178278330894 | 0.85539737542013  |
| H | 0.55987379933013  | -2.47076224447193 | 0.14709710728499  |
| H | -0.85147817381481 | -2.16794311483327 | -0.87664353572864 |
| H | -3.29133878181142 | -0.82949911007048 | 0.08865183855408  |

## Compound 8

### GIBBS FREE ENERGY

The Gibbs free energy is  $G = H - T \cdot S$

Total enthalpy ... -709.46325075 Eh

Total entropy correction ... -0.05877106 Eh -36.88 kcal/mol

Final Gibbs free energy ... -709.52202181 Eh

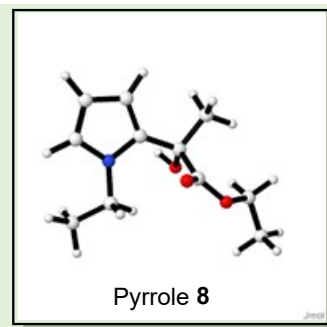

|   |                   |                   |                   |
|---|-------------------|-------------------|-------------------|
| C | -6.28737338405470 | 2.60749527605171  | 0.18209572904559  |
| C | -4.88265327539720 | 2.77226939515001  | 0.18020559412357  |
| C | -6.53278737991120 | 1.25819449294884  | 0.09860260108777  |
| C | -4.30838768833968 | 1.51851574484477  | 0.09394091401276  |
| N | -5.33575847500712 | 0.59369730148341  | 0.03458649540568  |
| C | -5.18488943009238 | -0.86167302737860 | 0.05780049143947  |
| C | -6.35601385982159 | -1.59811478326670 | -0.57508516704725 |
| C | -2.85409845836065 | 1.15793520825115  | -0.00335540317371 |
| C | -1.98126478652600 | 2.41114034083559  | 0.14752789153226  |
| O | -2.59433519897681 | 0.52432680686381  | -1.28103654535435 |
| C | -2.44093775132415 | 0.16304676704212  | 1.11775858117921  |
| O | -3.09833108966049 | 0.06018640833439  | 2.11868180946133  |
| O | -1.33507821964298 | -0.59126786544846 | 0.99978175100919  |
| C | -0.22152845008354 | -0.39138293128732 | 0.09989481605219  |
| C | 0.40573870793913  | -1.74593429761455 | -0.14941873689803 |
| H | -7.03232133593001 | 3.38374960981574  | 0.23430689303618  |
| H | -4.35325806288103 | 3.70700989783878  | 0.24275421061835  |
| H | -7.46599719493411 | 0.72616326277419  | 0.06914790750224  |
| H | -5.04634943874633 | -1.18335401921404 | 1.09133806202623  |
| H | -4.27112147074308 | -1.10113984714769 | -0.48385704641801 |
| H | -7.27755079061788 | -1.46740850146891 | -0.00799084444839 |
| H | -6.13209521705826 | -2.66582603216770 | -0.58866723144868 |
| H | -6.53117191857112 | -1.26809755384596 | -1.60070647525059 |
| H | -2.28461105121461 | 3.16109405458372  | -0.58181250408799 |
| H | -0.93749374547717 | 2.16597934033755  | -0.03316825811822 |
| H | -2.08357970934558 | 2.83347491486760  | 1.14704333565517  |
| H | -3.09813255555656 | 1.02455868269947  | -1.93448483170758 |
| H | 0.47985910062481  | 0.27437006078857  | 0.61021631829178  |
| H | -0.55404662837190 | 0.06482215255993  | -0.82646152830427 |
| H | 0.68648006563487  | -2.22322094129469 | 0.78985575702825  |
| H | 1.30307099943272  | -1.63169917109220 | -0.76076350375373 |
| H | -0.28933230698521 | -2.39765074684457 | -0.67977108249641 |

**TS-1****GIBBS FREE ENERGY**The Gibbs free energy is  $G = H - T \cdot S$ 

Total enthalpy ... -785.82742070 Eh  
 Total entropy correction ... -0.06329099 Eh -39.72 kcal/mol

Final Gibbs free energy ... -785.89071169 Eh

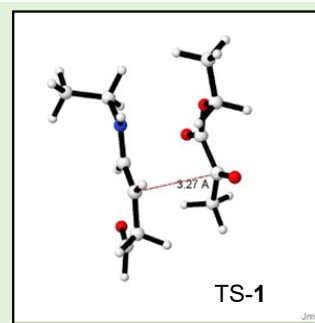

|   |                   |                   |                   |
|---|-------------------|-------------------|-------------------|
| C | -5.29133752571890 | 5.04178394837014  | -0.71835832780240 |
| C | -3.80426535349049 | 4.67945940948909  | -0.75116685228423 |
| N | -3.38365651310053 | 3.78681919061243  | 0.31097722264852  |
| C | -3.45538686414169 | 2.42141774131178  | 0.22063657730331  |
| H | -3.80754089054184 | 2.04731431346972  | -0.74304309439051 |
| C | -3.09563683944884 | 1.55100379909344  | 1.19286913884512  |
| C | -3.20774096126491 | 0.05558283843794  | 1.16458500840468  |
| C | -3.78252954712974 | -0.65024845626035 | -0.03532213261965 |
| O | -4.00870084914298 | -0.17651054637403 | -1.12371970825549 |
| H | -3.98407222140329 | -1.73981392118007 | 0.15347315814429  |
| H | -5.54325876354297 | 5.75393947349902  | -1.52088628976095 |
| H | -5.56631696979766 | 5.50764600222223  | 0.24315074991692  |
| H | -5.91686045397941 | 4.14415736850711  | -0.85022105683365 |
| H | -3.18938410308886 | 5.59328011309438  | -0.69348840872703 |
| H | -3.53790138317894 | 4.20531966102906  | -1.70871071697005 |
| H | -3.23310740697015 | 4.19128559613507  | 1.22800944704228  |
| H | -2.70868129639419 | 1.95556658604785  | 2.13685966684515  |
| H | -3.78843057504510 | -0.31779744410460 | 2.03321275032246  |
| H | -2.21425805682510 | -0.42515896218809 | 1.31561315788976  |
| C | -0.25486752583522 | 1.55731333573309  | -0.42573494136081 |
| C | -0.57120726975885 | 0.31051588831647  | -1.20364509984048 |
| O | 0.35692612631444  | 1.56203377413314  | 0.61820363470221  |
| C | -0.71009870415444 | 2.86492298929053  | -1.12426532977047 |
| O | -1.26895693601182 | 2.80344127568055  | -2.19204076964937 |
| O | -0.43383113081460 | 4.04757431477340  | -0.57463209432933 |
| C | 0.00592945480154  | 4.27256068880128  | 0.77844403982302  |
| C | -0.07448505218950 | 5.76507335227649  | 1.01389816216329  |
| H | -1.62474944631433 | 0.29567260353015  | -1.51310526866667 |
| H | -0.31307456415987 | -0.56717985784850 | -0.59702143254310 |
| H | 0.02249118863109  | 0.30857704006591  | -2.13279331680601 |
| H | 1.02926108629356  | 3.89335115497950  | 0.90827265236158  |
| H | -0.63898071743318 | 3.71214847204225  | 1.47007735093977  |
| H | 0.56247453793667  | 6.30746145195129  | 0.29927509250991  |
| H | 0.26607471078318  | 6.00634130255869  | 2.03331819928958  |
| H | -1.10755918388007 | 6.12541550250004  | 0.88907883145829  |

-----  
**VIBRATIONAL FREQUENCIES**  
-----

Scaling factor for frequencies = 1.000000000 (already applied!)

|                      |                           |     |                            |      |                            |
|----------------------|---------------------------|-----|----------------------------|------|----------------------------|
| 0:                   | 0.00 cm** <sup>-1</sup>   | 36: | 704.54 cm** <sup>-1</sup>  | 73:  | 1468.09 cm** <sup>-1</sup> |
| 1:                   | 0.00 cm** <sup>-1</sup>   | 37: | 707.62 cm** <sup>-1</sup>  | 74:  | 1481.28 cm** <sup>-1</sup> |
| 2:                   | 0.00 cm** <sup>-1</sup>   | 38: | 724.29 cm** <sup>-1</sup>  | 75:  | 1490.89 cm** <sup>-1</sup> |
| 3:                   | 0.00 cm** <sup>-1</sup>   | 39: | 788.19 cm** <sup>-1</sup>  | 76:  | 1495.53 cm** <sup>-1</sup> |
| 4:                   | 0.00 cm** <sup>-1</sup>   | 40: | 826.34 cm** <sup>-1</sup>  | 77:  | 1498.01 cm** <sup>-1</sup> |
| 5:                   | 0.00 cm** <sup>-1</sup>   | 41: | 835.64 cm** <sup>-1</sup>  | 78:  | 1504.63 cm** <sup>-1</sup> |
| 6:                   | -58.75 cm** <sup>-1</sup> | 42: | 851.91 cm** <sup>-1</sup>  | 79:  | 1516.06 cm** <sup>-1</sup> |
| ***imaginary mode*** |                           |     |                            |      |                            |
| 7:                   | 46.32 cm** <sup>-1</sup>  | 43: | 860.66 cm** <sup>-1</sup>  | 80:  | 1521.41 cm** <sup>-1</sup> |
| 8:                   | 56.63 cm** <sup>-1</sup>  | 44: | 917.88 cm** <sup>-1</sup>  | 81:  | 1525.95 cm** <sup>-1</sup> |
| 9:                   | 68.89 cm** <sup>-1</sup>  | 45: | 947.36 cm** <sup>-1</sup>  | 82:  | 1688.86 cm** <sup>-1</sup> |
| 10:                  | 78.74 cm** <sup>-1</sup>  | 46: | 992.26 cm** <sup>-1</sup>  | 83:  | 1759.94 cm** <sup>-1</sup> |
| 11:                  | 86.02 cm** <sup>-1</sup>  | 47: | 1038.60 cm** <sup>-1</sup> | 84:  | 1765.88 cm** <sup>-1</sup> |
| 12:                  | 99.53 cm** <sup>-1</sup>  | 48: | 1044.78 cm** <sup>-1</sup> | 85:  | 1778.53 cm** <sup>-1</sup> |
| 13:                  | 115.21 cm** <sup>-1</sup> | 49: | 1049.80 cm** <sup>-1</sup> | 86:  | 2754.64 cm** <sup>-1</sup> |
| 14:                  | 127.22 cm** <sup>-1</sup> | 50: | 1054.89 cm** <sup>-1</sup> | 87:  | 2851.82 cm** <sup>-1</sup> |
| 15:                  | 146.68 cm** <sup>-1</sup> | 51: | 1058.79 cm** <sup>-1</sup> | 88:  | 2892.23 cm** <sup>-1</sup> |
| 16:                  | 170.80 cm** <sup>-1</sup> | 52: | 1068.45 cm** <sup>-1</sup> | 89:  | 2938.94 cm** <sup>-1</sup> |
| 17:                  | 174.07 cm** <sup>-1</sup> | 53: | 1116.49 cm** <sup>-1</sup> | 90:  | 2949.84 cm** <sup>-1</sup> |
| 18:                  | 190.73 cm** <sup>-1</sup> | 54: | 1139.89 cm** <sup>-1</sup> | 91:  | 2955.37 cm** <sup>-1</sup> |
| 19:                  | 209.23 cm** <sup>-1</sup> | 55: | 1170.78 cm** <sup>-1</sup> | 92:  | 2963.76 cm** <sup>-1</sup> |
| 20:                  | 231.41 cm** <sup>-1</sup> | 56: | 1180.25 cm** <sup>-1</sup> | 93:  | 2976.91 cm** <sup>-1</sup> |
| 21:                  | 269.39 cm** <sup>-1</sup> | 57: | 1188.87 cm** <sup>-1</sup> | 94:  | 2981.39 cm** <sup>-1</sup> |
| 22:                  | 280.45 cm** <sup>-1</sup> | 58: | 1246.92 cm** <sup>-1</sup> | 95:  | 3001.64 cm** <sup>-1</sup> |
| 23:                  | 297.99 cm** <sup>-1</sup> | 59: | 1271.00 cm** <sup>-1</sup> | 96:  | 3002.57 cm** <sup>-1</sup> |
| 24:                  | 337.75 cm** <sup>-1</sup> | 60: | 1299.67 cm** <sup>-1</sup> | 97:  | 3008.30 cm** <sup>-1</sup> |
| 25:                  | 355.23 cm** <sup>-1</sup> | 61: | 1307.68 cm** <sup>-1</sup> | 98:  | 3018.50 cm** <sup>-1</sup> |
| 26:                  | 359.20 cm** <sup>-1</sup> | 62: | 1320.19 cm** <sup>-1</sup> | 99:  | 3022.44 cm** <sup>-1</sup> |
| 27:                  | 368.71 cm** <sup>-1</sup> | 63: | 1347.65 cm** <sup>-1</sup> | 100: | 3024.99 cm** <sup>-1</sup> |
| 28:                  | 386.72 cm** <sup>-1</sup> | 64: | 1366.66 cm** <sup>-1</sup> | 101: | 3030.48 cm** <sup>-1</sup> |
| 29:                  | 410.00 cm** <sup>-1</sup> | 65: | 1395.34 cm** <sup>-1</sup> | 102: | 3068.10 cm** <sup>-1</sup> |
| 30:                  | 424.31 cm** <sup>-1</sup> | 66: | 1410.61 cm** <sup>-1</sup> | 103: | 3109.70 cm** <sup>-1</sup> |
| 31:                  | 439.20 cm** <sup>-1</sup> | 67: | 1414.23 cm** <sup>-1</sup> | 104: | 3521.12 cm** <sup>-1</sup> |
| 32:                  | 482.74 cm** <sup>-1</sup> | 68: | 1416.63 cm** <sup>-1</sup> |      |                            |
| 33:                  | 518.86 cm** <sup>-1</sup> | 69: | 1429.08 cm** <sup>-1</sup> |      |                            |
| 34:                  | 561.97 cm** <sup>-1</sup> | 70: | 1433.33 cm** <sup>-1</sup> |      |                            |
| 35:                  | 620.93 cm** <sup>-1</sup> | 71: | 1439.80 cm** <sup>-1</sup> |      |                            |
|                      |                           | 72: | 1450.50 cm** <sup>-1</sup> |      |                            |

## TS-2

### GIBBS FREE ENERGY

The Gibbs free energy is  $G = H - T \cdot S$

Total enthalpy ... -709.43509124 Eh

Total entropy correction ... -0.05773824 Eh -36.23 kcal/mol

Final Gibbs free energy ... -709.49282948 Eh

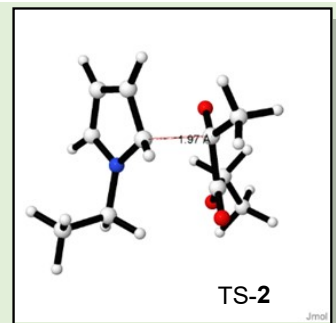

|   |                   |                   |                   |
|---|-------------------|-------------------|-------------------|
| C | -5.20139091652128 | 1.90154914003427  | -1.80204903854822 |
| C | -4.59119508431160 | 2.53478647917973  | -0.71604133090565 |
| C | -5.38688541382182 | 0.56670572994587  | -1.46555490098565 |
| C | -4.33025328847540 | 1.50758000551729  | 0.31777668551074  |
| N | -4.90520260860648 | 0.34075529057403  | -0.17465415503159 |
| C | -5.25858099721471 | -0.82621034522594 | 0.62487134222106  |
| C | -6.66561063652616 | -0.71857326038373 | 1.21368819454015  |
| C | -2.36571957752660 | 1.45809389070201  | 0.32749816253754  |
| C | -1.97686117493546 | 2.62536855900009  | 1.21928879706243  |
| O | -2.18625219891002 | 1.58301019917433  | -0.95966635328915 |
| C | -2.21688904120407 | 0.10090519697078  | 0.97716077932218  |
| O | -2.42217213156625 | -0.05292979218749 | 2.16411611821118  |
| O | -2.02785255701637 | -0.98230143815383 | 0.20084129814318  |
| C | -1.30520271582218 | -0.98585871717390 | -1.04173749017907 |
| C | -0.52061330638494 | -2.28445916894071 | -1.09527660209496 |
| H | -5.46114562592078 | 2.35683314522615  | -2.75593917906816 |
| H | -4.29379147743965 | 3.57629218974996  | -0.62508032499492 |
| H | -5.82205279305907 | -0.24990803021717 | -2.03869047609438 |
| H | -4.51118258192352 | -0.93779193428093 | 1.42134897710417  |
| H | -5.16462174068060 | -1.71426601254667 | -0.02028817848911 |
| H | -6.74217771148363 | 0.14825337415014  | 1.88922431697048  |
| H | -6.91440032868560 | -1.62177096803169 | 1.79292816172104  |
| H | -7.42096968105206 | -0.59588546560680 | 0.42093351550804  |
| H | -2.42150939460031 | 3.55404185218630  | 0.82965996367945  |
| H | -0.88174853709233 | 2.75585698517291  | 1.20180875814703  |
| H | -2.28943552667477 | 2.46484433712124  | 2.26003646209917  |
| H | -0.63945871407253 | -0.11259866186153 | -1.10089068819710 |
| H | -2.02397365180595 | -0.89768963012225 | -1.87038911898956 |
| H | 0.20236990870624  | -2.33685719626919 | -0.26607237007673 |
| H | 0.03379931493725  | -2.36074106932066 | -2.04457924276468 |
| H | -1.19613127769447 | -3.14989395292323 | -1.01043593034000 |
| H | -4.43420853261122 | 1.69140926854038  | 1.39626384727113  |

### VIBRATIONAL FREQUENCIES



Scaling factor for frequencies = 1.000000000 (already applied!)

|                      |                            |     |                            |     |                            |
|----------------------|----------------------------|-----|----------------------------|-----|----------------------------|
| 0:                   | 0.00 cm** <sup>-1</sup>    | 43: | 975.62 cm** <sup>-1</sup>  | 87: | 3001.48 cm** <sup>-1</sup> |
| 1:                   | 0.00 cm** <sup>-1</sup>    | 44: | 985.67 cm** <sup>-1</sup>  | 88: | 3011.80 cm** <sup>-1</sup> |
| 2:                   | 0.00 cm** <sup>-1</sup>    | 45: | 1022.49 cm** <sup>-1</sup> | 89: | 3012.65 cm** <sup>-1</sup> |
| 3:                   | 0.00 cm** <sup>-1</sup>    | 46: | 1050.87 cm** <sup>-1</sup> | 90: | 3023.00 cm** <sup>-1</sup> |
| 4:                   | 0.00 cm** <sup>-1</sup>    | 47: | 1074.33 cm** <sup>-1</sup> | 91: | 3037.44 cm** <sup>-1</sup> |
| 5:                   | 0.00 cm** <sup>-1</sup>    | 48: | 1090.53 cm** <sup>-1</sup> | 92: | 3040.89 cm** <sup>-1</sup> |
| 6:                   | -345.76 cm** <sup>-1</sup> | 49: | 1106.26 cm** <sup>-1</sup> | 93: | 3137.39 cm** <sup>-1</sup> |
| ***imaginary mode*** |                            |     |                            |     |                            |
| 7:                   | 49.35 cm** <sup>-1</sup>   | 50: | 1111.05 cm** <sup>-1</sup> | 94: | 3151.41 cm** <sup>-1</sup> |
| 8:                   | 62.88 cm** <sup>-1</sup>   | 51: | 1124.02 cm** <sup>-1</sup> | 95: | 3164.73 cm** <sup>-1</sup> |
| 9:                   | 106.22 cm** <sup>-1</sup>  | 52: | 1130.52 cm** <sup>-1</sup> |     |                            |
| 10:                  | 116.98 cm** <sup>-1</sup>  | 53: | 1143.42 cm** <sup>-1</sup> |     |                            |
| 11:                  | 132.34 cm** <sup>-1</sup>  | 54: | 1189.38 cm** <sup>-1</sup> |     |                            |
| 12:                  | 142.78 cm** <sup>-1</sup>  | 55: | 1199.07 cm** <sup>-1</sup> |     |                            |
| 13:                  | 150.52 cm** <sup>-1</sup>  | 56: | 1248.68 cm** <sup>-1</sup> |     |                            |
| 14:                  | 175.11 cm** <sup>-1</sup>  | 57: | 1260.46 cm** <sup>-1</sup> |     |                            |
| 15:                  | 208.73 cm** <sup>-1</sup>  | 58: | 1289.56 cm** <sup>-1</sup> |     |                            |
| 16:                  | 217.90 cm** <sup>-1</sup>  | 59: | 1316.12 cm** <sup>-1</sup> |     |                            |
| 17:                  | 257.59 cm** <sup>-1</sup>  | 60: | 1323.74 cm** <sup>-1</sup> |     |                            |
| 18:                  | 297.00 cm** <sup>-1</sup>  | 61: | 1368.12 cm** <sup>-1</sup> |     |                            |
| 19:                  | 302.97 cm** <sup>-1</sup>  | 62: | 1384.26 cm** <sup>-1</sup> |     |                            |
| 20:                  | 323.76 cm** <sup>-1</sup>  | 63: | 1410.51 cm** <sup>-1</sup> |     |                            |
| 21:                  | 339.95 cm** <sup>-1</sup>  | 64: | 1411.92 cm** <sup>-1</sup> |     |                            |
| 22:                  | 360.32 cm** <sup>-1</sup>  | 65: | 1416.02 cm** <sup>-1</sup> |     |                            |
| 23:                  | 375.82 cm** <sup>-1</sup>  | 66: | 1430.36 cm** <sup>-1</sup> |     |                            |
| 24:                  | 399.08 cm** <sup>-1</sup>  | 67: | 1434.98 cm** <sup>-1</sup> |     |                            |
| 25:                  | 416.92 cm** <sup>-1</sup>  | 68: | 1444.37 cm** <sup>-1</sup> |     |                            |
| 26:                  | 432.12 cm** <sup>-1</sup>  | 69: | 1486.69 cm** <sup>-1</sup> |     |                            |
| 27:                  | 556.54 cm** <sup>-1</sup>  | 70: | 1491.71 cm** <sup>-1</sup> |     |                            |
| 28:                  | 569.97 cm** <sup>-1</sup>  | 71: | 1493.76 cm** <sup>-1</sup> |     |                            |
| 29:                  | 587.21 cm** <sup>-1</sup>  | 72: | 1500.32 cm** <sup>-1</sup> |     |                            |
| 30:                  | 597.89 cm** <sup>-1</sup>  | 73: | 1501.44 cm** <sup>-1</sup> |     |                            |
| 31:                  | 640.49 cm** <sup>-1</sup>  | 74: | 1502.14 cm** <sup>-1</sup> |     |                            |
| 32:                  | 703.88 cm** <sup>-1</sup>  | 75: | 1508.06 cm** <sup>-1</sup> |     |                            |
| 33:                  | 717.81 cm** <sup>-1</sup>  | 76: | 1524.80 cm** <sup>-1</sup> |     |                            |
| 34:                  | 742.24 cm** <sup>-1</sup>  | 77: | 1527.03 cm** <sup>-1</sup> |     |                            |
| 35:                  | 759.68 cm** <sup>-1</sup>  | 78: | 1706.11 cm** <sup>-1</sup> |     |                            |
| 36:                  | 833.41 cm** <sup>-1</sup>  | 79: | 2948.08 cm** <sup>-1</sup> |     |                            |
| 37:                  | 846.46 cm** <sup>-1</sup>  | 80: | 2948.84 cm** <sup>-1</sup> |     |                            |
| 38:                  | 854.39 cm** <sup>-1</sup>  | 81: | 2951.00 cm** <sup>-1</sup> |     |                            |
| 39:                  | 902.75 cm** <sup>-1</sup>  | 82: | 2967.37 cm** <sup>-1</sup> |     |                            |
| 40:                  | 927.40 cm** <sup>-1</sup>  | 83: | 2968.67 cm** <sup>-1</sup> |     |                            |
| 41:                  | 937.15 cm** <sup>-1</sup>  | 84: | 2993.61 cm** <sup>-1</sup> |     |                            |
| 42:                  | 963.99 cm** <sup>-1</sup>  | 85: | 2994.73 cm** <sup>-1</sup> |     |                            |
|                      |                            | 86: | 2998.72 cm** <sup>-1</sup> |     |                            |

## TS-Paal-Knorr cyclization

### GIBBS FREE ENERGY

The Gibbs free energy is  $G = H - T \cdot S$

Total enthalpy : -364.9206796 Eh

Total entropy correction : -0.04267934 Eh -26.78 kcal/mol

Final Gibbs free energy : -364.96335891 Eh

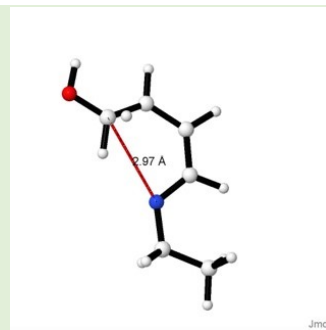

### Xyz coordinates

|   |                   |                   |                   |
|---|-------------------|-------------------|-------------------|
| C | -1.97270210333040 | -0.57580951822897 | 0.09097337490660  |
| C | -1.79594873403213 | 0.78286392844580  | -0.05908304134773 |
| C | -0.51578444265479 | 1.44961720308210  | 0.12206103412973  |
| C | 0.76518728436389  | 0.87091205708422  | 0.04881537287464  |
| N | 0.96893566327021  | -0.39374181809837 | -0.24863189881249 |
| C | 2.29982631786412  | -0.95109266561643 | -0.25160509029623 |
| C | 3.49603996884709  | -0.05522212785513 | 0.07293898806133  |
| O | -3.14898745864219 | -1.20984556443372 | -0.08839004080138 |
| H | -1.10113406279017 | -1.23828002758972 | 0.04507412503515  |
| H | -2.68394455981246 | 1.42067693310508  | -0.14926205061769 |
| H | -3.85997512139717 | -0.55706164353667 | -0.17423493506045 |
| H | -0.55130117056799 | 2.52555859428717  | 0.31654967311088  |
| H | 1.60440301010674  | 1.55624498445625  | 0.25607070073712  |
| H | -1.71476073998640 | -0.63928465011339 | 1.78653653829565  |
| H | 2.28554486532063  | -1.81045885042418 | 0.44888027670966  |
| H | 2.44900151709002  | -1.42105760668798 | -1.24397512892297 |
| H | 3.59177999185555  | 0.78024748890605  | -0.63967345844625 |
| H | 3.42973154184863  | 0.37024439103889  | 1.08742386592078  |
| H | 4.42448823264680  | -0.64521110782100 | 0.01923169452366  |

### VIBRATIONAL FREQUENCIES

Scaling factor for frequencies = 1.000000000 (already applied!)

|                      |                           |     |                         |     |                         |
|----------------------|---------------------------|-----|-------------------------|-----|-------------------------|
| 0:                   | 0.00 cm <sup>-1</sup>     | 8:  | 120.52 cm <sup>-1</sup> | 17: | 536.63 cm <sup>-1</sup> |
| 1:                   | 0.00 cm <sup>-1</sup>     | 9:  | 173.79 cm <sup>-1</sup> | 18: | 575.95 cm <sup>-1</sup> |
| 2:                   | 0.00 cm <sup>-1</sup>     | 10: | 223.02 cm <sup>-1</sup> | 19: | 739.88 cm <sup>-1</sup> |
| 3:                   | 0.00 cm <sup>-1</sup>     | 11: | 235.32 cm <sup>-1</sup> | 20: | 755.21 cm <sup>-1</sup> |
| 4:                   | 0.00 cm <sup>-1</sup>     | 12: | 275.06 cm <sup>-1</sup> | 21: | 807.76 cm <sup>-1</sup> |
| 5:                   | 0.00 cm <sup>-1</sup>     | 13: | 325.67 cm <sup>-1</sup> | 22: | 836.98 cm <sup>-1</sup> |
| 6:                   | -1039.38 cm <sup>-1</sup> | 14: | 389.12 cm <sup>-1</sup> | 23: | 910.79 cm <sup>-1</sup> |
| ***imaginary mode*** |                           | 15: | 436.16 cm <sup>-1</sup> | 24: | 956.04 cm <sup>-1</sup> |
| 7:                   | 108.92 cm <sup>-1</sup>   | 16: | 451.66 cm <sup>-1</sup> | 25: | 984.01 cm <sup>-1</sup> |

26: 1012.43 cm<sup>\*\*</sup>-1  
27: 1027.68 cm<sup>\*\*</sup>-1  
28: 1057.75 cm<sup>\*\*</sup>-1  
29: 1096.46 cm<sup>\*\*</sup>-1  
30: 1145.32 cm<sup>\*\*</sup>-1  
31: 1147.40 cm<sup>\*\*</sup>-1  
32: 1182.02 cm<sup>\*\*</sup>-1  
33: 1216.60 cm<sup>\*\*</sup>-1  
34: 1295.04 cm<sup>\*\*</sup>-1  
35: 1317.20 cm<sup>\*\*</sup>-1  
36: 1321.36 cm<sup>\*\*</sup>-1  
37: 1348.07 cm<sup>\*\*</sup>-1  
38: 1400.24 cm<sup>\*\*</sup>-1  
39: 1415.91 cm<sup>\*\*</sup>-1  
40: 1419.29 cm<sup>\*\*</sup>-1  
41: 1463.87 cm<sup>\*\*</sup>-1  
42: 1477.41 cm<sup>\*\*</sup>-1  
43: 1486.34 cm<sup>\*\*</sup>-1  
44: 1496.34 cm<sup>\*\*</sup>-1  
45: 1552.77 cm<sup>\*\*</sup>-1  
46: 1618.06 cm<sup>\*\*</sup>-1  
47: 2893.97 cm<sup>\*\*</sup>-1  
48: 2899.71 cm<sup>\*\*</sup>-1  
49: 2944.36 cm<sup>\*\*</sup>-1  
50: 2969.72 cm<sup>\*\*</sup>-1  
51: 2997.41 cm<sup>\*\*</sup>-1  
52: 3004.80 cm<sup>\*\*</sup>-1  
53: 3049.03 cm<sup>\*\*</sup>-1  
54: 3073.25 cm<sup>\*\*</sup>-1  
55: 3083.08 cm<sup>\*\*</sup>-1  
56: 3732.52 cm<sup>\*\*</sup>-1

## TS-C

### GIBBS FREE ENERGY

The Gibbs free energy is  $G = H - T \cdot S$

Total enthalpy : -785.72930296 Eh

Total entropy correction : -0.06109137 Eh -38.34 kcal/mol

Final Gibbs free energy : -785.79039432 Eh

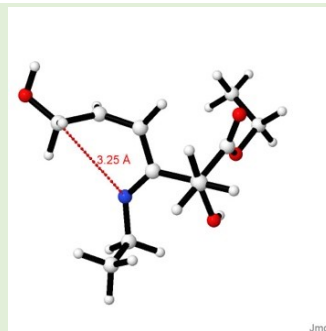

|   |                   |                   |                   |
|---|-------------------|-------------------|-------------------|
| C | -1.45968968598785 | -0.42333009324673 | 1.44763998300493  |
| C | -1.83378813078774 | 0.27994234593954  | 0.18079929090182  |
| C | -1.02013087787744 | 1.35722925348894  | -0.37865816911443 |
| C | 0.24199782203921  | 1.11865347507376  | -0.99558904749358 |
| N | 0.65745068872653  | -0.12380580189241 | -1.00392849476568 |
| C | 1.93840436316877  | -0.61814755454417 | -1.45568240458805 |
| C | 2.95558957674632  | -0.60911359480517 | -0.30691818187236 |
| O | -2.54942593203810 | -1.06956010004245 | 2.07200126318452  |
| H | -0.72065053611211 | -1.21226941757496 | 1.20530304855177  |
| H | -2.55831172264173 | -0.23902882596172 | -0.46246457137672 |
| H | -3.23383661111239 | -0.40299042705632 | 2.22016073340955  |
| H | -1.37669854190591 | 2.39121228283144  | -0.29443587532884 |
| H | -0.93849852160214 | 0.28224217841265  | 2.13036942991680  |
| H | 1.78097301052280  | -1.66554887860434 | -1.76720886405643 |
| H | 2.36317404798669  | -0.06486019828948 | -2.30344511199335 |
| H | 3.21846362698857  | 0.42237234781069  | -0.02635989567362 |
| H | 2.54714646883923  | -1.11646770963493 | 0.58126935120622  |
| H | 3.87944668976228  | -1.12587610765550 | -0.61149268365668 |
| H | 1.58008688058682  | 1.84687025075873  | -3.28717595467942 |
| C | 0.99787975919528  | 2.38340841663111  | -1.52451097017635 |
| C | 1.64349498305372  | 3.13296129942430  | -0.36127319223844 |
| C | -0.04400750408912 | 3.28138066009583  | -2.22007751904134 |
| O | 2.01783357353940  | 2.08699086085342  | -2.45713313410666 |
| O | -0.26909107631237 | 2.83262728088658  | -3.47000835958500 |
| O | -0.60463041267810 | 4.22902466485177  | -1.73040635729688 |
| H | 2.36801428514308  | 2.47598918769567  | 0.13907483623982  |
| H | 2.16973881508199  | 4.02044579354637  | -0.74155467951968 |
| H | 0.88550091924115  | 3.45223918816468  | 0.36476303214100  |
| C | -1.29127571291777 | 3.49212429157253  | -4.24582921122097 |
| C | -2.66133418584883 | 2.91718875723629  | -3.93656025040433 |
| H | -1.00409949436542 | 3.31935379445130  | -5.29264159554573 |
| H | -1.25213170277273 | 4.57012917665320  | -4.03227669201895 |
| H | -2.67838656255031 | 1.82969594169768  | -4.10734200802937 |
| H | -3.41898002986208 | 3.38321671580241  | -4.58659630157354 |
| H | -2.93912826915971 | 3.11510054542920  | -2.89061144319994 |

-----  
 VIBRATIONAL FREQUENCIES  
 -----

Scaling factor for frequencies = 1.00000000 (already applied!)

|                      |                            |     |                            |     |                            |
|----------------------|----------------------------|-----|----------------------------|-----|----------------------------|
| 0:                   | 0.00 cm** <sup>-1</sup>    | 32: | 501.78 cm** <sup>-1</sup>  | 65: | 1341.83 cm** <sup>-1</sup> |
| 1:                   | 0.00 cm** <sup>-1</sup>    | 33: | 530.88 cm** <sup>-1</sup>  | 66: | 1365.63 cm** <sup>-1</sup> |
| 2:                   | 0.00 cm** <sup>-1</sup>    | 34: | 574.93 cm** <sup>-1</sup>  | 67: | 1381.05 cm** <sup>-1</sup> |
| 3:                   | 0.00 cm** <sup>-1</sup>    | 35: | 603.54 cm** <sup>-1</sup>  | 68: | 1382.77 cm** <sup>-1</sup> |
| 4:                   | 0.00 cm** <sup>-1</sup>    | 36: | 626.96 cm** <sup>-1</sup>  | 69: | 1400.20 cm** <sup>-1</sup> |
| 5:                   | 0.00 cm** <sup>-1</sup>    | 37: | 689.96 cm** <sup>-1</sup>  | 70: | 1406.32 cm** <sup>-1</sup> |
| 6:                   | -201.39 cm** <sup>-1</sup> | 38: | 739.89 cm** <sup>-1</sup>  | 71: | 1415.93 cm** <sup>-1</sup> |
| ***imaginary mode*** |                            |     |                            |     |                            |
| 7:                   | 12.24 cm** <sup>-1</sup>   | 39: | 750.52 cm** <sup>-1</sup>  | 72: | 1417.16 cm** <sup>-1</sup> |
| 8:                   | 20.92 cm** <sup>-1</sup>   | 40: | 801.76 cm** <sup>-1</sup>  | 73: | 1423.34 cm** <sup>-1</sup> |
| 9:                   | 43.75 cm** <sup>-1</sup>   | 41: | 835.88 cm** <sup>-1</sup>  | 74: | 1430.03 cm** <sup>-1</sup> |
| 10:                  | 62.26 cm** <sup>-1</sup>   | 42: | 852.38 cm** <sup>-1</sup>  | 75: | 1473.52 cm** <sup>-1</sup> |
| 11:                  | 92.98 cm** <sup>-1</sup>   | 43: | 863.90 cm** <sup>-1</sup>  | 76: | 1477.44 cm** <sup>-1</sup> |
| 12:                  | 99.14 cm** <sup>-1</sup>   | 44: | 879.61 cm** <sup>-1</sup>  | 77: | 1480.25 cm** <sup>-1</sup> |
| 13:                  | 108.15 cm** <sup>-1</sup>  | 45: | 909.04 cm** <sup>-1</sup>  | 78: | 1483.38 cm** <sup>-1</sup> |
| 14:                  | 126.84 cm** <sup>-1</sup>  | 46: | 931.27 cm** <sup>-1</sup>  | 79: | 1486.04 cm** <sup>-1</sup> |
| 15:                  | 170.44 cm** <sup>-1</sup>  | 47: | 968.11 cm** <sup>-1</sup>  | 80: | 1486.80 cm** <sup>-1</sup> |
| 16:                  | 172.62 cm** <sup>-1</sup>  | 48: | 1019.38 cm** <sup>-1</sup> | 81: | 1489.76 cm** <sup>-1</sup> |
| 17:                  | 211.32 cm** <sup>-1</sup>  | 49: | 1023.47 cm** <sup>-1</sup> | 82: | 1502.39 cm** <sup>-1</sup> |
| 18:                  | 247.17 cm** <sup>-1</sup>  | 50: | 1037.40 cm** <sup>-1</sup> | 83: | 1507.64 cm** <sup>-1</sup> |
| 19:                  | 290.82 cm** <sup>-1</sup>  | 51: | 1070.70 cm** <sup>-1</sup> | 84: | 1515.87 cm** <sup>-1</sup> |
| 20:                  | 298.62 cm** <sup>-1</sup>  | 52: | 1085.67 cm** <sup>-1</sup> | 85: | 1764.97 cm** <sup>-1</sup> |
| 21:                  | 302.70 cm** <sup>-1</sup>  | 53: | 1094.48 cm** <sup>-1</sup> | 86: | 2871.66 cm** <sup>-1</sup> |
| 22:                  | 307.79 cm** <sup>-1</sup>  | 54: | 1115.32 cm** <sup>-1</sup> | 87: | 2899.38 cm** <sup>-1</sup> |
| 23:                  | 337.15 cm** <sup>-1</sup>  | 55: | 1121.87 cm** <sup>-1</sup> | 88: | 2922.24 cm** <sup>-1</sup> |
| 24:                  | 353.17 cm** <sup>-1</sup>  | 56: | 1149.83 cm** <sup>-1</sup> | 89: | 2945.85 cm** <sup>-1</sup> |
| 25:                  | 355.96 cm** <sup>-1</sup>  | 57: | 1165.31 cm** <sup>-1</sup> | 90: | 2955.75 cm** <sup>-1</sup> |
| 26:                  | 365.57 cm** <sup>-1</sup>  | 58: | 1177.64 cm** <sup>-1</sup> | 91: | 2975.32 cm** <sup>-1</sup> |
| 27:                  | 376.30 cm** <sup>-1</sup>  | 59: | 1180.62 cm** <sup>-1</sup> | 92: | 2983.43 cm** <sup>-1</sup> |
| 28:                  | 403.84 cm** <sup>-1</sup>  | 60: | 1205.07 cm** <sup>-1</sup> | 93: | 2998.20 cm** <sup>-1</sup> |
| 29:                  | 409.92 cm** <sup>-1</sup>  | 61: | 1209.66 cm** <sup>-1</sup> | 94: | 3008.34 cm** <sup>-1</sup> |
| 30:                  | 421.96 cm** <sup>-1</sup>  | 62: | 1246.83 cm** <sup>-1</sup> | 95: | 3012.28 cm** <sup>-1</sup> |
| 31:                  | 456.98 cm** <sup>-1</sup>  | 63: | 1291.19 cm** <sup>-1</sup> | 96: | 3017.17 cm** <sup>-1</sup> |
|                      |                            | 64: | 1317.18 cm** <sup>-1</sup> |     |                            |
